# Supplementary material for: A new chiral C1-symmetric NHC-catalyzed addition to α-aryl substituted α,β-disubstituted enals: enantioselective synthesis of fully functionalized dihydropyranones
Source: Royal Society of Chemistry journal article supplement (doi:10.1039/c5cc00118h), 2015-01-01
Supplement: c5cc00118h1.pdf [file c5cc00118h1.pdf]

**A New Chiral C<sub>1</sub>-Symmetric NHC-Catalyzed Addition to  $\alpha$ -Aryl Substituted  
 $\alpha,\beta$ -Disubstituted Enals: Enantioselective Synthesis of Fully Functionalized  
Dihydropyranones**

Hong Lu, Jin-Yu Liu, Chen-Guang Li, Jun-Bing Lin, Yong-Min Liang and Peng-Fei Xu\*

*State Key Laboratory of Applied Organic Chemistry, College of Chemistry and Chemical Engineering,*

*Lanzhou University, Lanzhou 730000, P. R. China*

## Contents

|                                                                                                             |     |
|-------------------------------------------------------------------------------------------------------------|-----|
| 1. General Information.....                                                                                 | S3  |
| 2. Preparation and Spectral Data of $\alpha$ -Aryl Substituted $\alpha,\beta$ -Disubstituted Aldehydes..... | S4  |
| 2.1 General Procedure for $\alpha$ -Aryl Substituted $\alpha,\beta$ -Disubstituted Aldehydes.....           | S4  |
| 2.2 Spectral Data of Substrates.....                                                                        | S5  |
| 3. General Procedure for the Synthesis of Chiral N-Heterocyclic Carbene Catalysts.....                      | S9  |
| 4. General Procedure and Spectral Data of Products.....                                                     | S13 |
| 4.1 General Procedure for the Synthesis of Dihydropyranones.....                                            | S13 |
| 4.2. Analytical data of Dihydropyranones.....                                                               | S14 |
| 5. X-ray Crystallographic Data.....                                                                         | S25 |
| 6. NMR and HPLC spectrogram.....                                                                            | S26 |

## 1. General Information

Chemicals and solvents were either purchased from commercial suppliers or purified by standard techniques. Analytical thin-layer chromatography (TLC) was performed on silicycle silica gel plates with F-254 indicator and compounds were visualized by irradiation with UV light. Flash chromatography was carried out utilizing silica gel 200-300 mesh.  $^1\text{H}$  NMR,  $^{13}\text{C}$  NMR spectra were recorded on a Bruker AM-400 spectrometer (400 MHz  $^1\text{H}$ , 100 MHz  $^{13}\text{C}$ ). The spectra were recorded in  $\text{CDCl}_3$  as the solvent at room temperature,  $^1\text{H}$  and  $^{13}\text{C}$  NMR chemical shifts are reported in ppm relative to either the residual solvent peak ( $^{13}\text{C}$ ) ( $\delta = 77.00$  ppm) or TMS ( $^1\text{H}$ ) ( $\delta = 0$  ppm) as an internal standard. Data for  $^1\text{H}$  NMR are reported as follows: chemical shift ( $\delta$  ppm), multiplicity (s = singlet, d = doublet, t = triplet, m = multiplet, dd = doublet), integration, coupling constant (Hz) and assignment. Data for  $^{13}\text{C}$  NMR are reported as chemical shift. IR spectra were recorded using Nicolet NEXUS 670 FT-IR instrument and are reported in wavenumbers ( $\text{cm}^{-1}$ ). HRMS were performed on Bruker Apex II mass instrument (ESI). Enantiomeric excess values were determined by HPLC with employing a Daicel Chirapak AD-H/OD-H/OJ-H on Agilent 1100 series and Waters 600 Deltaeluting with *i*-PrOH and *n*-hexane. Optical rotation was measured on the Perkin Elmer 341 polarimeter with  $[\alpha]_{\text{D}}$  values reported in degrees; concentration (c) is in g/100 mL.

## 2. Preparation and Spectral Data of $\alpha$ -Aryl Substituted $\alpha,\beta$ -Disubstituted Aldehydes

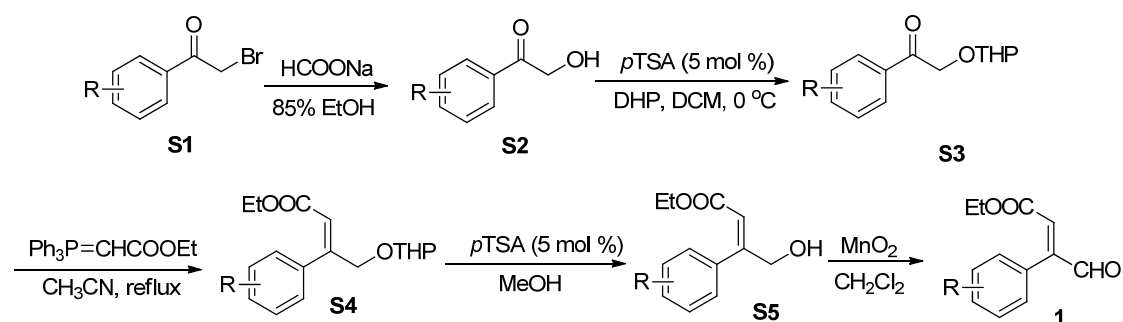

### 2.1 General Procedure for $\alpha$ -Aryl Substituted $\alpha,\beta$ -Disubstituted Aldehydes

A solution of **S1** (35 mmol) of  $\alpha$ -bromo ketone and 15.0g (220 mmol) of sodium formate in 90 mL 85% ethanol was heated to reflux for 12h. After the reaction was completed, the mixture was cool to ambient temperature, and ethanol was removed in *vacuo*, diluted with water (20 mL), aqueous layer was extracted with ethyl acetate (3  $\times$  40 mL), and the combined organic phases were dried over Na<sub>2</sub>SO<sub>4</sub>, filtered and concentrated. The ketols **S2** were recrystallized from 95% ethanol.

A 250 mL flame-dried round bottom flask was charged with **S2** (22 mmol) and *p*-toluenesulfonic acid 230 mg (1.1 mmol) under a dry N<sub>2</sub> atmosphere. After DCM (130 mL) was added to the flask, the mixture was cooled to 0 °C. 3,4-dihydro-2H-pyran (DHP) 9.26 g (110 mmol) was then added dropwise to the mixture. After a further 2 hours of stirring at 0 °C (determined by TLC), the reaction mixture was quenched with saturated NaHCO<sub>3</sub>. The organic layer was separated and the aqueous layer was extracted into DCM (3  $\times$  20 mL). The combined organics were washed with brine, dried over Na<sub>2</sub>SO<sub>4</sub>, filtered, and concentrated in *vacuo*, and purified with flash chromatography (eluent, ethyl acetate/petroleum ether 1/9) to yield crude product **S3**.

The crude product **S3** (10 mmol) was dissolved in acetonitrile (20 mL) in a 50 mL round bottom flask, ethyl 2-(triphenylphosphoranylidene)acetate 4.0 g (12 mmol) was added to the solution. The mixture was refluxed for 12 h. The mixture was evaporated to distill off one third of acetonitrile, and then continued to react for about 12 h (determined by TLC) until the reaction was complete. Solvent was distilled off, the concentrate was extracted with ether and washed with water. The combined organics were dried over Na<sub>2</sub>SO<sub>4</sub>, filtered, and concentrated in *vacuo*, and purified with flash chromatography (eluent, ethyl acetate/petroleum ether 1/9) to yield crude coupling product **S4**.

The crude product **S4** (7.5 mmol) was dissolved in MeOH (40 mL) and then cooled to 0 °C. *p*-Toluenesulfonic acid 71.3 mg (0.375 mmol) was added to the mixture. The reaction was brought to ambient temperature. After a further 3 hours of stirring at ambient temperature (determined by TLC), the reaction mixture was quenched with saturated NaHCO<sub>3</sub> at 0 °C. MeOH was distilled off, and the concentrate was extracted with ethyl acetate (3 × 20 mL). The combined organics were washed with brine, dried over Na<sub>2</sub>SO<sub>4</sub>, filtered, and concentrated in *vacuo*, yielding **S5** that was used directly without further purification in the next step.

To a stirred solution of **S5** (5 mmol) in CH<sub>2</sub>Cl<sub>2</sub> (50 ml) was added MnO<sub>2</sub> (55 mol) at room temperature. After completion of the reaction (monitored by TLC), MnO<sub>2</sub> was removed, and the organic layers were concentrated in *vacuo*, the crude product was purified by silica gel column chromatography using (eluent, ethyl acetate/petroleum ether 1/8) to afford pure  $\alpha,\beta$ -unsaturated aldehyde **1** as light yellow liquid.

## 2.2 Spectral Data of Substrates

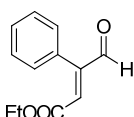

**(E)-ethyl 4-oxo-3-phenylbut-2-enoate (1a)** <sup>1</sup>H NMR (400 MHz, CDCl<sub>3</sub>):  $\delta$  = 9.73 (s, 1H), 7.40–7.36 (m, 3H), 7.25–7.20 (m, 2H), 6.69 (s, 1H), 4.11 (q,  $J$  = 7.2 Hz, 2H), 1.10 (t,  $J$  = 7.2 Hz, 3H); <sup>13</sup>C NMR (100 MHz, CDCl<sub>3</sub>):  $\delta$  = 192.7, 165.0, 149.3, 136.0, 131.2, 128.9, 128.8, 127.8, 61.1, 13.6.

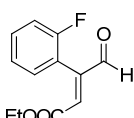

**(E)-ethyl 3-(2-fluorophenyl)-4-oxobut-2-enoate (1b)** <sup>1</sup>H NMR (400 MHz, CDCl<sub>3</sub>):  $\delta$  = 9.74 (s, 1H), 7.42–7.36 (m, 1H), 7.19–7.14 (m, 2H), 7.10 (t, 1H), 6.84 (s, 1H), 4.17–4.12 (d,  $J$  = 7.2 Hz, 2H), 1.14 (t,  $J$  = 7.2 Hz, 3H); <sup>13</sup>C NMR (100 MHz, CDCl<sub>3</sub>):  $\delta$  = 191.7, 164.3, 160.7, 158.3, 144.6, 137.8, 130.9, 130.89, 130.7, 130.69, 123.64, 123.61, 119.5, 119.3, 115.4, 115.2, 61.3, 13.7.

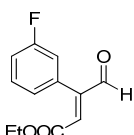

**(E)-ethyl 3-(3-chlorophenyl)-4-oxobut-2-enoate (1c)** <sup>1</sup>H NMR (400 MHz, CDCl<sub>3</sub>):  $\delta$  = 9.75 (s, 1H), 7.40–7.34 (m, 1H), 7.13–7.08 (td,  $J$  = 2.4 Hz,  $J$  = 3.6 Hz, 1H), 7.00–6.94 (m, 2H), 6.74 (s, 1H), 4.16 (q,  $J$  = 7.2 Hz, 2H), 1.15 (t,  $J$  = 7.2 Hz, 3H); <sup>13</sup>C NMR

(100 MHz, CDCl<sub>3</sub>):  $\delta$  = 192.1, 164.6, 163.4, 160.9, 148.2, 137.0, 133.2, 133.1, 129.5, 129.46, 124.7, 116.2, 116.0, 115.8, 61.3, 13.7.

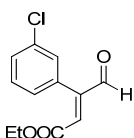

**(E)-ethyl 3-(3-chlorophenyl)-4-oxobut-2-enoate (1d)** <sup>1</sup>H NMR (400 MHz, CDCl<sub>3</sub>):  $\delta$  = 9.73 (s, 1H), 7.39–7.31 (m, 2H), 7.22 (s, 1H), 7.11 (d,  $J$  = 7.6 Hz, 1H), 6.73 (s, 1H), 4.16 (q,  $J$  = 7.2 Hz, 2H), 1.15 (t,  $J$  = 7.2 Hz, 3H); <sup>13</sup>C NMR (100 MHz, CDCl<sub>3</sub>):  $\delta$  = 192.1, 164.5, 148.1, 137.0, 133.7, 132.8, 129.1, 129.0, 128.9, 127.1, 61.4, 13.7.

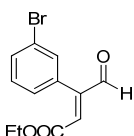

**(E)-ethyl 3-(3-bromophenyl)-4-oxobut-2-enoate (1e)** <sup>1</sup>H NMR (400 MHz, CDCl<sub>3</sub>):  $\delta$  = 9.70 (s, 1H), 7.53–7.50 (m, 1H), 7.37 (t,  $J$  = 2.0 Hz, 1H), 7.26 (t,  $J$  = 8.0 Hz, 1H), 7.16–7.13 (m, 1H), 6.72 (s, 1H), 4.13 (q,  $J$  = 7.2 Hz, 2H), 1.14 (t,  $J$  = 7.2 Hz, 3H); <sup>13</sup>C NMR (100 MHz, CDCl<sub>3</sub>):  $\delta$  = 192.0, 164.4, 147.8, 137.0, 133.0, 131.8, 131.7, 129.3, 127.5, 121.7, 61.3, 13.7.

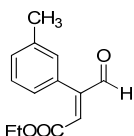

**(E)-ethyl 4-oxo-3-(m-tolyl)but-2-enoate (1f)** <sup>1</sup>H NMR (400 MHz, CDCl<sub>3</sub>):  $\delta$  = 9.74 (s, 1H), 7.27 (q,  $J$  = 7.6 Hz, 1H), 7.20 (d,  $J$  = 7.6 Hz, 1H), 7.02 (d,  $J$  = 7.6 Hz, 2H), 6.68 (s, 1H), 4.13 (q,  $J$  = 7.2 Hz, 2H), 2.36 (s, 3H), 1.13 (t,  $J$  = 7.2 Hz, 3H); <sup>13</sup>C NMR (100 MHz, CDCl<sub>3</sub>):  $\delta$  = 192.8, 165.1, 149.5, 137.5, 135.8, 131.1, 129.8, 129.4, 127.9, 125.9, 61.1, 21.3, 13.7.

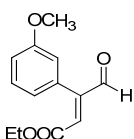

**(E)-ethyl 3-(3-methoxyphenyl)-4-oxobut-2-enoate (1g)** <sup>1</sup>H NMR (400 MHz, CDCl<sub>3</sub>):  $\delta$  = 9.74 (s, 1H), 7.30 (t,  $J$  = 8.0 Hz, 1H), 6.94 (dd,  $J$  = 2.4 Hz,  $J$  = 8.4 Hz, 1H), 6.81–6.77 (m, 1H), 6.70 (s, 1H), 4.13 (q,  $J$  = 7.2 Hz, 2H), 3.80 (s, 3H), 1.13 (t,  $J$  = 7.2 Hz, 3H); <sup>13</sup>C NMR (100 MHz, CDCl<sub>3</sub>):  $\delta$  = 192.5, 165.0, 159.1, 149.1, 136.0, 132.5, 129.1, 121.2, 114.6, 114.5, 61.2, 55.2, 13.8.

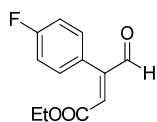

**(E)-ethyl 3-(4-fluorophenyl)-4-oxobut-2-enoate (1h)**  $^1\text{H}$  NMR (400 MHz,  $\text{CDCl}_3$ ):  $\delta$  = 9.74 (s, 1H), 7.26–7.21 (m, 2H), 7.11–7.07 (m, 2H), 6.71 (s, 1H), 4.15 (q,  $J$  = 7.2 Hz, 2H), 1.16 (t,  $J$  = 7.2 Hz, 3H);  $^{13}\text{C}$  NMR (100 MHz,  $\text{CDCl}_3$ ):  $\delta$  = 192.6, 164.8, 164.4, 161.9, 148.6, 136.6, 131.1, 131.0, 126.9, 126.8, 115.2, 115.0, 61.3, 13.8.

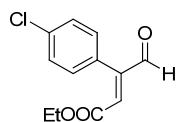

**(E)-ethyl 3-(4-chlorophenyl)-4-oxobut-2-enoate (1i)**  $^1\text{H}$  NMR (400 MHz,  $\text{CDCl}_3$ ):  $\delta$  = 9.73 (s, 1H), 7.38 (dd,  $J$  = 2.0 Hz,  $J$  = 6.8 Hz, 2H), 7.16 (dd,  $J$  = 1.6 Hz,  $J$  = 6.8 Hz, 2H), 6.71 (s, 1H), 4.15 (q,  $J$  = 7.2 Hz, 2H), 1.17 (t,  $J$  = 7.2 Hz, 3H);  $^{13}\text{C}$  NMR (100 MHz,  $\text{CDCl}_3$ ):  $\delta$  = 192.4, 164.7, 148.5, 136.7, 135.2, 130.4, 129.4, 128.2, 61.4, 13.8.

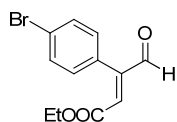

**(E)-ethyl 3-(4-bromophenyl)-4-oxobut-2-enoate (1g)**  $^1\text{H}$  NMR (400 MHz,  $\text{CDCl}_3$ ):  $\delta$  = 9.73 (s, 1H), 7.53 (d,  $J$  = 8.4 Hz, 2H), 7.10 (d,  $J$  = 8.4 Hz, 2H), 6.72 (s, 1H), 4.15 (q,  $J$  = 7.2 Hz, 2H), 1.17 (t,  $J$  = 7.2 Hz, 3H);  $^{13}\text{C}$  NMR (100 MHz,  $\text{CDCl}_3$ ):  $\delta$  = 192.3, 164.7, 148.6, 136.7, 131.2, 130.7, 130.0, 123.5, 61.4, 13.8.

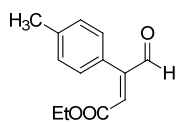

**(E)-ethyl 4-oxo-3-(p-tolyl)but-2-enoate (1k)**  $^1\text{H}$  NMR (400 MHz,  $\text{CDCl}_3$ ):  $\delta$  = 9.73 (s, 1H), 7.20 (d,  $J$  = 7.6 Hz, 2H), 7.13 (m, 2H), 6.66 (s, 1H), 4.14 (q,  $J$  = 7.2 Hz, 2H), 2.37 (s, 3H), 1.16 (t,  $J$  = 7.2 Hz, 3H);  $^{13}\text{C}$  NMR (100 MHz,  $\text{CDCl}_3$ ):  $\delta$  = 192.9, 165.1, 149.4, 139.0, 135.5, 128.8, 128.6, 128.1, 61.1, 21.3, 13.8.

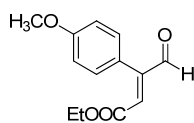

**(E)-ethyl 3-(4-methoxyphenyl)-4-oxobut-2-enoate (1l)**  $^1\text{H}$  NMR (400 MHz,  $\text{CDCl}_3$ ):  $\delta$  = 9.70 (s, 1H), 7.21 (dd,  $J$  = 2.0 Hz,  $J$  = 6.8 Hz, 2H), 6.92 (dd,  $J$  = 2.0 Hz,  $J$  = 6.8 Hz, 2H), 6.63 (s, 1H), 4.16 (q,  $J$  = 7.2 Hz, 2H), 3.82 (s, 3H), 1.18 (t,  $J$  = 7.2 Hz, 3H);  $^{13}\text{C}$  NMR (100 MHz,  $\text{CDCl}_3$ ):  $\delta$  = 193.3, 165.2, 160.3, 148.9, 135.2, 130.6, 123.0, 113.4, 61.1, 55.2, 13.9.

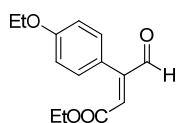

**(E)-ethyl 3-(4-ethoxyphenyl)-4-oxobut-2-enoate (1m)**  $^1\text{H}$  NMR (400 MHz,  $\text{CDCl}_3$ ):  $\delta$  = 9.70 (s, 1H), 7.21 (d,  $J$  = 8.4 Hz, 2H), 6.92 (d,  $J$  = 8.8 Hz, 2H), 6.62 (s, 1H), 4.17

(q,  $J = 7.2$  Hz, 2H), 4.06 (q,  $J = 7.2$  Hz, 2H), 1.42 (t,  $J = 7.2$  Hz, 3H), 1.18 (t,  $J = 7.2$  Hz, 3H);  $^{13}\text{C}$  NMR (100 MHz,  $\text{CDCl}_3$ ):  $\delta = 193.3, 165.3, 159.8, 148.8, 135.1, 130.6, 122.9, 114.0, 63.4, 61.1, 14.7, 13.9$ .

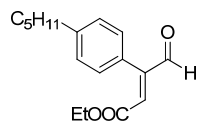

**(E)-ethyl 4-oxo-3-(4-pentylphenyl)but-2-enoate (1n)**  $^1\text{H}$  NMR (400 MHz,  $\text{CDCl}_3$ ):  $\delta = 9.75$  (s, 1H), 7.22 (d,  $J = 8.4$  Hz, 2H), 7.16 (t,  $J = 1.6$  Hz,  $J = 6.4$  Hz, 2H), 6.66 (s, 1H), 4.17 (q,  $J = 7.2$  Hz, 2H), 2.64 (t,  $J = 7.6$  Hz,  $J = 8$  Hz, 2H), 1.67–1.59 (m, 2H), 1.37–1.31 (m, 4H), 1.15 (t,  $J = 7.2$  Hz, 3H), 0.91 (t,  $J = 6.8$  Hz,  $J = 7.2$  Hz, 3H);  $^{13}\text{C}$  NMR (100 MHz,  $\text{CDCl}_3$ ):  $\delta = 193.0, 165.2, 149.4, 144.1, 135.5, 128.9, 128.3, 128.0, 61.2, 35.8, 31.5, 30.9, 22.5, 14.0, 13.8$ .

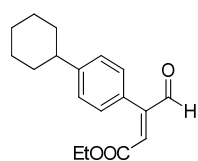

**(E)-ethyl 3-(4-cyclohexylphenyl)-4-oxobut-2-enoate (1o)**  $^1\text{H}$  NMR (400 MHz,  $\text{CDCl}_3$ ):  $\delta = 9.76$  (s, 1H), 7.24 (d,  $J = 8.4$  Hz, 2H), 7.17 (d,  $J = 8$  Hz, 2H), 6.66 (s, 1H), 4.16–4.11 (q,  $J = 7.2$  Hz, 2H), 2.54–2.49 (m, 1H), 1.89–1.83 (m, 4H), 1.76 (d,  $J = 8.4$  Hz, 1H), 1.47–1.34 (m, 4H), 1.29–1.24 (m, 1H), 1.13 (t,  $J = 7.2$  Hz, 3H);  $^{13}\text{C}$  NMR (100 MHz,  $\text{CDCl}_3$ ):  $\delta = 193.1, 165.3, 149.3, 149.2, 135.5, 129.0, 128.5, 126.5, 61.2, 44.4, 34.3, 26.8, 26.1, 13.8$ .

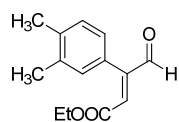

**(E)-ethyl 3-(3,4-dimethylphenyl)-4-oxobut-2-enoate (1p)**  $^1\text{H}$  NMR (400 MHz,  $\text{CDCl}_3$ ):  $\delta = 9.73$  (s, 1H), 7.16 (d,  $J = 7.6$  Hz, 2H), 7.00–6.96 (m, 2H), 6.65 (s, 1H), 4.18–4.12 (q,  $J = 7.2$  Hz, 2H), 2.27 (d, 6H), 1.16 (t,  $J = 7.2$  Hz, 3H);  $^{13}\text{C}$  NMR (100 MHz,  $\text{CDCl}_3$ ):  $\delta = 193.1, 165.2, 149.5, 137.8, 136.1, 135.3, 129.9, 129.3, 128.6, 126.4, 61.1, 19.7, 19.6, 13.8$ .

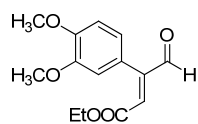

**(E)-ethyl 3-(3,4-dimethoxyphenyl)-4-oxobut-2-enoate (1q)**  $^1\text{H}$  NMR (400 MHz,  $\text{CDCl}_3$ ):  $\delta = 9.76$  (s, 1H), 6.91–6.81 (m, 3H), 6.66 (s, 1H), 4.20–4.14 (q,  $J = 7.2$  Hz, 2H), 3.91 (s, 3H), 3.87 (s, 3H), 1.19 (t,  $J = 7.2$  Hz, 3H);  $^{13}\text{C}$  NMR (100 MHz,  $\text{CDCl}_3$ ):  $\delta = 193.1, 165.3, 149.8, 148.5, 148.4, 135.4, 123.5, 122.2, 112.5, 110.6, 61.1, 55.8, 13.9$ .



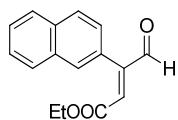

**(E)-ethyl 3-(naphthalen-2-yl)-4-oxobut-2-enoate (1r)**  $^1\text{H}$  NMR (400 MHz,  $\text{CDCl}_3$ ):  $\delta$  = 9.73 (s, 1H), 7.81–7.77 (m, 3H), 7.70 (s, 1H), 7.45–7.40 (m, 2H), 7.27 (dd,  $J$  = 1.2 Hz,  $J$  = 8.4 Hz, 1H), 6.67 (s, 1H), 4.04 (q,  $J$  = 7.2 Hz, 2H), 0.99 (t,  $J$  = 7.2 Hz, 3H);  $^{13}\text{C}$  NMR (100 MHz,  $\text{CDCl}_3$ ):  $\delta$  = 192.6, 164.8, 149.0, 136.1, 133.1, 132.5, 128.6, 128.5, 128.1, 127.5, 127.2, 126.5, 126.3, 126.0, 60.9, 13.5.

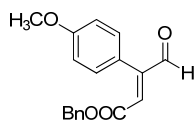

**(E)-benzyl 3-(4-methoxyphenyl)-4-oxobut-2-enoate (1s)**  $^1\text{H}$  NMR (400 MHz,  $\text{CDCl}_3$ ):  $\delta$  = 9.71 (s, 1H), 7.31 (t,  $J$  = 3.2 Hz, 3H), 7.19–7.15 (m, 4H), 6.87–6.84 (m, 2H), 6.65 (s, 1H), 5.12 (s, 2H), 3.80 (s, 3H);  $^{13}\text{C}$  NMR (100 MHz,  $\text{CDCl}_3$ ):  $\delta$  = 193.1, 165.1, 160.3, 149.1, 134.9, 134.7, 130.6, 128.4, 128.36, 123.0, 113.5, 66.9, 55.1.

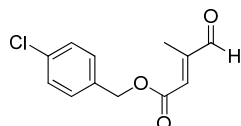

**(E)-4-chlorobenzyl 3-methyl-4-oxobut-2-enoate (1x)**  $^1\text{H}$  NMR (400 MHz,  $\text{CDCl}_3$ ):  $\delta$  = 9.55 (s, 1H), 7.38–7.82 (m, 4H), 6.54–6.53 (m, 1H), 5.21 (s, 2H), 2.88 (d,  $J$  = 1.6 Hz, 3H);  $^{13}\text{C}$  NMR (100 MHz,  $\text{CDCl}_3$ ):  $\delta$  = 194.3, 165.1, 151.2, 134.7, 134.5, 133.7, 129.8, 128.9, 66.0, 10.9.

### 3. General Procedure for the Synthesis of Chiral N-Heterocyclic Carbene Catalysts

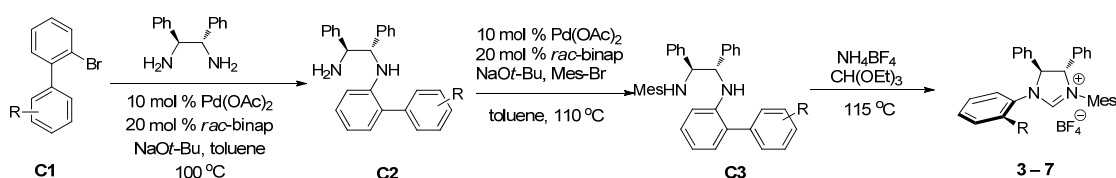

A flame-dried, round-bottom flask equipped with reflux condenser was charged with  $\text{Pd}(\text{OAc})_2$  (89 mg, 0.4 mmol), *rac*-binap (498 mg, 0.8 mmol),  $\text{NaOt-Bu}$  (769 mg, 8.0 mmol), **C1** (4.0 mmol), and (*S,S*)-1,2-diphenyl ethylenediamine (1.3 g, 6.0 mmol) under a dry  $\text{N}_2$  atmosphere. Toluene (70 mL) was added to the mixture. After 10 hours at 100 °C, the solution was allowed to cool to room temperature, passed through a plug of Celite, concentrated, and purified by silica gel chromatography (eluent, ethyl acetate/petroleum ether 1/1) to afford product diamine **C2** as light yellow oil.

Diamine **C2** (3.0 mmol) was added to a flame-dried, round-bottom flask charged with  $\text{Pd}(\text{OAc})_2$  (67 mg, 0.3 mmol), *rac*-binap (373 mg, 0.6 mmol),  $\text{NaOt-Bu}$  (578 mg, 6.0 mmol), mesityl bromide (598 mg, 3.0 mmol) under a dry  $\text{N}_2$  atmosphere. Toluene (70 mL) was added

to the mixture. After 12 hours at 110 °C, the solution was allowed to cool to room temperature and then passed through a plug of Celite, concentrated, and purified by silica gel column chromatography (eluent, petroleum ether/Et<sub>2</sub>O 20/1) to afford product **C3**.

A flame-dried, round-bottom flask equipped with a short path distillation set was charged with diamine **C3** (2.07mmol), HC(OEt)<sub>3</sub> (13 mL), and NH<sub>4</sub>BF<sub>4</sub> (325 mg, 3.10mmol). After 3 hours at 115 °C, the solution was allowed to cool to room temperature, concentrated, and purified by silicagel column chromatography (eluent, petroleum ether/EtOAc 1/3) to afford the corresponding imidazolium salt, which was triturated (hexane/CH<sub>2</sub>Cl<sub>2</sub>) to a white solid.

**(4S,5S)-1-([1,1'-biphenyl]-2-yl)-3-mesityl-4,5-diphenyl-4,5-dihydro-1H-imidazol-3-ium (5e)**

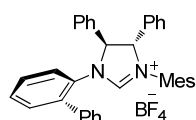

IR(KBr): 703, 759, 1065, 1220, 1261, 1456, 1959, 1618, 1710, 3062, 3432 cm<sup>-1</sup>; <sup>1</sup>H NMR (400 MHz, CDCl<sub>3</sub>): δ = 8.74 (s, 1H), 7.79–7.77 (m, 1H), 7.69–7.67 (m, 3H), 7.49(d, *J* = 3.2 Hz, 2H), 7.37–7.25 (m, 10H), 7.15 (t, *J* = 7.6 Hz, 2H), 6.91(s, 1H), 6.67(s, 1H), 6.59(d, *J* = 7.6 Hz, 2H), 5.42(d, *J* = 9.6 Hz, 1H), 5.27(d, *J* = 9.6 Hz, 1H), 2.53(s, 3H), 2.18(s, 3H), 1.81(s, 3H); <sup>13</sup>C NMR (100 MHz, CDCl<sub>3</sub>): δ = 157.5, 140.1, 138.6, 137.9, 135.2, 134.8, 134.3, 131.7, 131.4, 131.0, 130.4, 130.3, 130.1, 130.0, 129.8, 129.7, 129.6, 129.5, 129.4, 129.1, 128.9, 128.7, 128.6, 128.4, 127.8, 75.1, 72.5, 20.9, 18.7, 17.9. HRMS (ESI): [M]<sup>+</sup> calcd for [C<sub>36</sub>H<sub>33</sub>N<sub>2</sub>]: 493.2638, found: 493.2630.

**(4S,5S)-1-(3',5'-dimethyl-[1,1'-biphenyl]-2-yl)-3-mesityl-4,5-diphenyl-4,5-dihydro-1H-imidazol-3-ium (5f)**

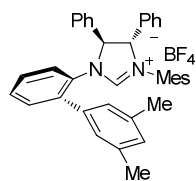

IR(KBr): 701, 1060, 1222, 1266, 1456, 1621, 1959, 2920, 3061, 3438 cm<sup>-1</sup>; <sup>1</sup>H NMR (400 MHz, CDCl<sub>3</sub>): δ = 8.73 (s, 1H), 7.77–7.75 (m, 1H), 7.39–7.09 (m, 13H), 6.91 (s, 1H), 6.66 (s, 1H), 6.60 (d, *J* = 7.6 Hz, 2H), 5.43 (d, *J* = 9.2 Hz, 1H), 5.36 (d, *J* = 9.2 Hz, 1H), 2.55 (s, 3H), 2.48 (s, 6H), 2.18 (s, 3H), 1.78 (s, 3H); <sup>13</sup>C NMR (100 MHz, CDCl<sub>3</sub>): δ = 157.2, 140.1, 139.3, 138.5, 138.1, 135.0, 134.9, 134.6, 132.0, 131.3, 131.0, 130.4, 130.1, 130.0, 129.8, 129.6, 129.3, 129.2, 128.9, 128.5, 128.3, 127.7, 126.7, 74.9, 72.3, 21.3, 20.8, 18.6, 17.7. HRMS (ESI): [M]<sup>+</sup> calcd for [C<sub>38</sub>H<sub>37</sub>N<sub>2</sub>]: 521.2951, found: 521.2952.

**(4S,5S)-1-(3',5'-di-tert-butyl-[1,1'-biphenyl]-2-yl)-3-mesityl-4,5-diphenyl-4,5-dihydro-1H-imidazol-3-ium (5h)**

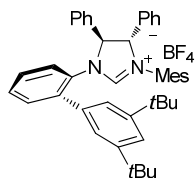

IR(KBr): 697, 1065, 1222, 1268, 1455, 1619, 1959, 2959, 3063, 3437  $\text{cm}^{-1}$ ;  
 $^1\text{H}$  NMR (400 MHz,  $\text{CDCl}_3$ ):  $\delta$  = 8.74 (s, 1H), 7.90 (d,  $J$  = 7.2 Hz, 1H), 7.75 (s, 1H), 7.41–7.13 (m, 16H), 6.91 (s, 1H), 6.63 (s, 1H), 6.47 (d,  $J$  = 6.4 Hz, 2H), 5.71 (d,  $J$  = 8.4 Hz, 1H), 5.31 (d,  $J$  = 8.4 Hz, 1H), 2.45 (s, 3H), 2.19 (s, 3H), 1.65 (s, 3H), 1.40 (s, 18H);  $^{13}\text{C}$  NMR (100 MHz,  $\text{CDCl}_3$ ):  $\delta$  = 157.4, 152.0, 140.2, 139.0, 138.1, 135.3, 134.9, 132.0, 131.6, 131.5, 130.4, 130.3, 130.0, 129.7, 129.6, 129.5, 129.1, 128.8, 128.6, 128.3, 127.4, 123.1, 123.0, 75.2, 72.1, 35.1, 31.5, 20.9, 18.5, 18.2. HRMS (ESI):  $[\text{M}]^+$  calcd for  $[\text{C}_{44}\text{H}_{49}\text{N}_2]$ : 605.3890, found: 605.3887.

**(4S,5S)-3-mesityl-1-(2-(naphthalen-2-yl)phenyl)-4,5-diphenyl-4,5-dihydro-1H-imidazol-3-ium (5i)**

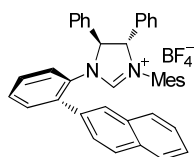

IR(KBr): 702, 784, 1061, 1220, 1266, 1455, 1620, 1959, 2922, 3057, 3437  $\text{cm}^{-1}$ ;  $^1\text{H}$  NMR (400 MHz,  $\text{CDCl}_3$ ):  $\delta$  = 8.82 (s, 1H), 8.16 (d,  $J$  = 8.4 Hz, 1H), 8.09 (d,  $J$  = 7.2 Hz, 1H), 8.02–7.96 (m, 2H), 7.78 (d,  $J$  = 7.2 Hz, 1H), 7.73–7.67 (m, 2H), 7.56 (d,  $J$  = 8.0 Hz, 1H), 7.37–7.23 (m, 9H), 7.07 (t,  $J$  = 7.2 Hz, 1H), 6.87 (s, 1H), 6.63 (s, 3H), 6.24 (d,  $J$  = 7.2 Hz, 2H), 5.33 (d,  $J$  = 9.2 Hz, 1H), 5.17 (d,  $J$  = 9.2 Hz, 1H), 2.51 (s, 3H), 2.15 (s, 3H), 1.74 (s, 3H);  $^{13}\text{C}$  NMR (100 MHz,  $\text{CDCl}_3$ ):  $\delta$  = 157.4, 140.1, 138.0, 135.7, 135.3, 134.7, 134.5, 133.4, 133.0, 131.7, 131.5, 131.1, 130.3, 130.1, 130.08, 130.0, 129.7, 129.6, 129.5, 129.4, 128.6, 128.3, 128.2, 128.15, 128.08, 128.0, 127.7, 127.5, 127.3, 126.5, 74.9, 72.4, 20.8, 18.6, 17.8. HRMS (ESI):  $[\text{M}]^+$  calcd for  $[\text{C}_{40}\text{H}_{35}\text{N}_2]$ : 543.2795, found: 543.2791.

**(4S,5S)-1-(3',5'-bis(trifluoromethyl)-[1,1'-biphenyl]-2-yl)-3-mesityl-4,5-diphenyl-4,5-dihydro-1H-imidazol-3-ium (5j)**

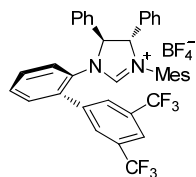

IR(KBr): 701, 1066, 1138, 1281, 1381, 1618, 1959, 2928, 3066, 3437  $\text{cm}^{-1}$ ;  
 $^1\text{H}$  NMR (400 MHz,  $\text{CDCl}_3$ ):  $\delta$  = 8.89 (s, 1H), 8.10 (s, 1H), 7.99 (d,  $J$  = 7.2 Hz, 3H), 7.37–7.33 (m, 4H), 7.32–7.25 (m, 2H), 7.21–7.13 (m, 4H), 7.09–7.06 (m, 2H), 6.93 (s, 1H), 6.73–6.71 (m, 3H), 5.51 (d,  $J$  = 10.4 Hz, 1H), 5.08 (d,  $J$  = 10 Hz, 1H), 2.52 (s, 3H), 2.22 (s, 3H), 1.87 (s, 3H);  $^{13}\text{C}$  NMR (100 MHz,  $\text{CDCl}_3$ ):  $\delta$  = 158.4, 141.2, 140.1, 135.7, 134.6, 133.9, 133.4, 133.2, 132.9, 132.5, 132.2, 131.8, 131.7, 131.1, 130.8, 130.6, 130.3, 129.97, 129.95, 129.8, 129.6, 129.5, 129.2, 128.5, 128.2, 127.7, 127.0, 124.3, 122.3, 121.6, 75.6, 73.2, 20.9, 18.7, 17.7. HRMS (ESI):  $[\text{M}]^+$  calcd for  $[\text{C}_{38}\text{H}_{31}\text{F}_6\text{N}_2]$ : 629.2386, found: 629.2383.

**(4R,5R)-1-(3',5'-bis(trifluoromethyl)-[1,1'-biphenyl]-2-yl)-3-mesityl-4,5-diphenyl-4,5-dihydro-1H-imidazol-3-ium (5k)**

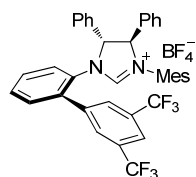

IR(KBr): 701, 1066, 1138, 1281, 1381, 1618, 1959, 2928, 3066, 3437  $\text{cm}^{-1}$ ;  
 $^1\text{H}$  NMR (400 MHz,  $\text{CDCl}_3$ ):  $\delta$  = 8.89 (s, 1H), 8.11 (s, 1H), 7.99–7.97 (m, 3H), 7.36–7.24 (m, 5H), 7.21–7.13 (m, 4H), 7.12–7.06 (m, 2H), 6.93 (s, 1H), 6.74–6.71 (m, 3H), 5.50 (d,  $J$  = 10.4 Hz, 1H), 5.07 (d,  $J$  = 10.4 Hz, 1H), 2.52 (s, 3H), 2.22 (s, 3H), 1.87 (s, 3H);  $^{13}\text{C}$  NMR (100 MHz,  $\text{CDCl}_3$ ):  $\delta$  = 158.4, 141.2, 140.1, 135.7, 134.6, 133.9, 133.4, 133.2, 132.8, 132.5, 132.2, 131.8, 131.7, 131.0, 130.8, 130.6, 130.3, 129.9, 129.8, 129.6, 129.5, 129.1, 128.5, 128.2, 127.7, 127.0, 124.3, 122.3, 121.6, 118.9, 75.6, 73.2, 20.9, 18.7, 17.7. HRMS (ESI):  $[\text{M}]^+$  calcd for  $[\text{C}_{38}\text{H}_{31}\text{F}_6\text{N}_2]$ : 629.2386, found: 629.2383.

**Representative procedure for synthesis of imidazolinium salt 5g:**

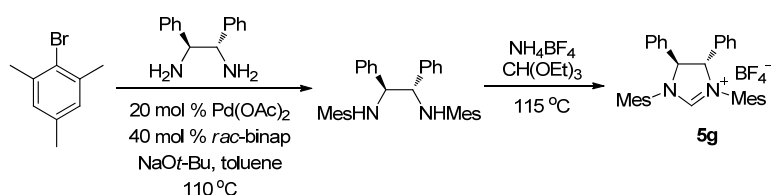

A flame-dried, round-bottom flask equipped with a reflux condenser was charged with Pd(OAc)<sub>2</sub> (106 mg, 0.472 mmol), *rac*-binap (587 mg, 0.944 mmol), NaO*t*-Bu (906 mg, 9.44 mmol), mesityl bromide (986 mg, 4.96 mmol), and (*S,S*)-1,2-diphenyl ethylenediamine (500 mg, 2.36 mmol) under a dry N<sub>2</sub> atmosphere. Toluene (60 mL) was added to the mixture. After 12 hours at 100 °C, the solution was allowed to cool to room temperature, passed through a plug of Celite, concentrated, and purified by silica gel chromatography (eluent, petroleum ether/Et<sub>2</sub>O 1/20) to afford product diamine.

A flame-dried, round-bottom flask equipped with a short path distillation set was charged with diamine (2.2 mmol), HC(OEt)<sub>3</sub> (14 mL), and NH<sub>4</sub>BF<sub>4</sub> (334 mg, 3.10 mmol). After 3 hours at 115 °C, the solution was allowed to cool to room temperature, concentrated, and purified by silicagel column chromatography (eluent, petroleum ether/EtOAc 1/3) to afford the corresponding imidazolium salt **2**, which was triturated (hexane/CH<sub>2</sub>Cl<sub>2</sub>) to a white solid.

**(4*S,S*)-1,3-dimesityl-4,5-diphenyl-4,5-dihydro-1*H*-imidazol-3-ium (5g)** IR (KBr): 700, 759, 854, 1060, 1224, 1267, 1456, 1959, 1620, 2823, 3040, 3438 cm<sup>-1</sup>; <sup>1</sup>H NMR (400 MHz, CDCl<sub>3</sub>): δ = 8.53 (s, 1H), 7.37 (d, *J* = 7.6 Hz, 10H), 6.96 (s, 2H), 6.70 (s, 2H), 6.01 (s, 2H), 2.66 (s, 3H), 2.19 (s, 3H), 1.90 (s, 3H); <sup>13</sup>C NMR (100 MHz, CDCl<sub>3</sub>): δ = 157.9, 140.2, 136.0, 134.3, 131.1, 130.6, 130.1, 130.0, 129.4, 128.8, 128.5, 72.8, 20.8, 18.8, 18.1. HRMS (ESI): [M]<sup>+</sup> calcd for [C<sub>33</sub>H<sub>35</sub>N<sub>2</sub>]: 459.2800, found: 459.2792.

## 4. General Procedure and Spectral Data of Products

### 4.1 General Procedure for the synthesis of Fully Functionalized Dihydropyranones

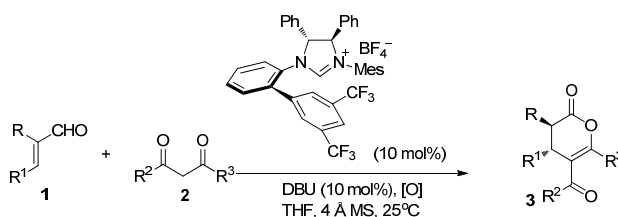

To a flame dried vessel were successively added NHC (0.01 mmol, 7.16 mg), 4 Å Molecular sieves (40.0 mg), DBU (0.01 mmol, 1.52 mg in 0.25 mL THF), oxidant (0.1 mmol, 40.8 mg), and **2a** (0.3 mmol, 30.3 mg) under N<sub>2</sub> atmosphere. After 10 min, **1a** (0.1 mmol, 20.4 mg in 0.25 mL THF) was added to the mixture. The reaction was stirred at 25 °C for a specified reaction time (monitored by TLC). When the reaction was completed, the solvent was evaporated under reduced pressure and the residue was purified by silica gel flash column chromatography (petroleum ether/EtOAc) to give the corresponding dihydropyranones **3a**.

## 4.2 Analytical Data of Fully Substituted Dihydropyranones

### (3S,4R)-ethyl 5-acetyl-6-methyl-2-oxo-3-phenyl-3,4-dihydro-2H-pyran-4-carboxylate (3a)

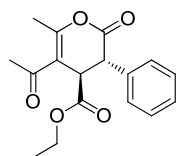

Pale Yellow Liquid.  $[\alpha]_D^{20} = 41$  ( $c$  1.0,  $\text{CH}_2\text{Cl}_2$ , 96% ee); IR(KBr): 702, 1027, 1157, 1261, 1363, 1456, 1601, 1730, 1791, 2371, 2856, 2925, 3275  $\text{cm}^{-1}$ ;  $^1\text{H}$  NMR (400 MHz,  $\text{CDCl}_3$ ):  $\delta = 7.37\text{--}7.31$  (m, 3H), 7.21–7.19 (m, 2H), 4.38 (d,  $J = 2.4$  Hz, 1H), 4.22–4.16 (q,  $J = 7.2$  Hz, 2H), 4.12 (d,  $J = 1.6$  Hz, 1H), 2.33 (t, 6H), 1.24 (t,  $J = 7.2$  Hz, 3H);  $^{13}\text{C}$  NMR (100 MHz,  $\text{CDCl}_3$ ):  $\delta = 196.6, 170.5, 165.3, 160.2, 133.9, 129.2, 128.3, 126.8, 112.6, 62.1, 45.6, 45.5, 30.2, 19.4, 13.9$ . The enantiomeric excess was determined by HPLC with an OJ-H column. ( $n$ -hexane: $i$ -PrOH = 80:20), 1 mL/min; major enantiomer  $t_R = 23.24$  min, minor enantiomer  $t_R = 27.88$  min. HRMS (ESI):  $[\text{M}+\text{H}]^+$  calcd for  $[\text{C}_{17}\text{H}_{18}\text{O}_5]$ : 303.1227, found: 303.1229.

### (3S,4R)-ethyl

### 5-acetyl-3-(2-fluorophenyl)-6-methyl-2-oxo-3,4-dihydro-2H-pyran-4-carboxylate (3b)

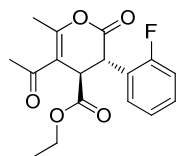

Pale Yellow Liquid.  $[\alpha]_D^{20} = -10$  ( $c$  1.0,  $\text{CH}_2\text{Cl}_2$ , 91% ee); IR(KBr): 763, 1038, 1114, 1159, 1367, 1457, 1590, 1728, 2375, 2923, 3390  $\text{cm}^{-1}$ ;  $^1\text{H}$  NMR (400 MHz,  $\text{CDCl}_3$ ):  $\delta = 7.36\text{--}7.31$  (m, 1H), 7.14–7.10 (m, 2H), 7.03–7.00 (m, 1H), 4.55 (d,  $J = 4.4$  Hz, 1H), 4.18–4.13 (q,  $J = 7.2$  Hz, 2H), 4.04 (d,  $J = 3.6$  Hz, 1H), 2.37 (s, 3H), 2.28 (s, 3H), 1.19 (t,  $J = 7.2$  Hz, 3H);  $^{13}\text{C}$  NMR (100 MHz,  $\text{CDCl}_3$ ):  $\delta = 196.8, 170.5, 164.7, 161.5, 159.8, 159.0, 130.4, 130.3, 128.4, 128.38, 124.8, 124.7, 121.6, 116.3, 116.0, 113.1, 62.1, 45.44, 45.42, 41.21, 41.19, 30.2, 19.2, 13.8$ . The enantiomeric excess was determined by HPLC with an AD-H column. ( $n$ -hexane: $i$ -PrOH = 80:20), 1 mL/min; minor enantiomer  $t_R = 7.32$  min, major enantiomer  $t_R = 8.79$  min. HRMS (ESI):  $[\text{M}+\text{H}]^+$  calcd for  $[\text{C}_{17}\text{H}_{17}\text{FO}_5]$ : 321.1133, found: 321.1137.

**(3S,4R)-ethyl**

**5-acetyl-3-(3-fluorophenyl)-6-methyl-2-oxo-3,4-dihydro-2H-pyran-4-carboxylate (3c)**

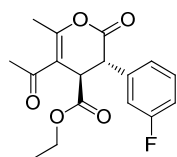

Pale Yellow Liquid.  $[\alpha]_{\text{D}}^{20} = 48$  ( $c$  1.0,  $\text{CH}_2\text{Cl}_2$ , 90% ee); IR(KBr): 743, 796, 1023, 1105, 1261, 1377, 1459, 1591, 1731, 2922, 2958, 3409  $\text{cm}^{-1}$ ;  $^1\text{H}$  NMR (400 MHz,  $\text{CDCl}_3$ ):  $\delta = 7.35\text{--}7.30$  (m, 1H), 7.05–7.00 (m, 2H), 6.96–6.93 (dd,  $J = 2$  Hz,  $J = 5.6$  Hz, 1H), 4.37 (d,  $J = 2.8$  Hz, 1H), 4.22–4.16 (q,  $J = 7.2$  Hz, 2H), 4.12–4.11 (dd,  $J = 0.8$  Hz,  $J = 2.4$  Hz, 1H), 2.36 (s, 3H), 2.33 (d,  $J = 0.8$  Hz, 3H), 1.24 (t,  $J = 7.2$  Hz, 3H);  $^{13}\text{C}$  NMR (100 MHz,  $\text{CDCl}_3$ ):  $\delta = 196.5, 170.3, 164.8, 164.2, 161.8, 160.0, 136.2, 136.1, 130.9, 130.8, 122.64, 122.61, 115.6, 115.4, 114.4, 114.2, 112.8, 62.2, 45.39, 45.38, 45.3, 30.3, 19.4, 13.9$ . The enantiomeric excess was determined by HPLC with an OD-H column. ( $n$ -hexane: $i$ -PrOH = 90:10), 1 mL/min; minor enantiomer  $t_{\text{R}} = 18.80$  min, major enantiomer  $t_{\text{R}} = 22.91$  min. HRMS (ESI):  $[\text{M}+\text{H}]^+$  calcd for  $[\text{C}_{17}\text{H}_{17}\text{FO}_5]$ : 321.1133, found: 321.1134.

**(3S,4R)-ethyl**

**5-acetyl-3-(3-chlorophenyl)-6-methyl-2-oxo-3,4-dihydro-2H-pyran-4-carboxylate (3d)**

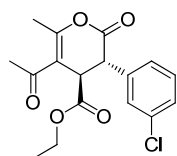

Yellow Liquid.  $[\alpha]_{\text{D}}^{20} = 94$  ( $c$  1.0,  $\text{CH}_2\text{Cl}_2$ , 93% ee); IR(KBr): 796, 1025, 1117, 1260, 1381, 1599, 1731, 1786, 2368, 2963, 3370  $\text{cm}^{-1}$ ;  $^1\text{H}$  NMR (400 MHz,  $\text{CDCl}_3$ ):  $\delta = 7.32\text{--}7.29$  (m, 2H), 7.22 (s, 1H), 7.09–7.07 (m, 1H), 4.35 (d,  $J = 2.8$  Hz, 1H), 4.21–4.16 (q,  $J = 7.2$  Hz, 2H), 4.11 (d,  $J = 2$  Hz, 1H), 2.37 (s, 3H), 2.34 (s, 3H), 1.24 (t,  $J = 7.2$  Hz, 3H);  $^{13}\text{C}$  NMR (100 MHz,  $\text{CDCl}_3$ ):  $\delta = 196.5, 170.3, 164.8, 160.0, 135.7, 135.1, 130.4, 128.7, 127.4, 125.0, 112.8, 62.2, 45.3, 45.2, 30.3, 19.4, 13.9$ . The enantiomeric excess was determined by HPLC with an OD-H column. ( $n$ -hexane: $i$ -PrOH = 95:5), 1 mL/min; minor enantiomer  $t_{\text{R}} = 28.51$  min, major enantiomer  $t_{\text{R}} = 33.50$  min. HRMS (ESI):  $[\text{M}+\text{Na}]^+$  calcd for  $[\text{C}_{17}\text{H}_{17}\text{ClO}_5]$ : 359.0657, found: 359.0664.

**(3S,4R)-ethyl**

**5-acetyl-3-(3-bromophenyl)-6-methyl-2-oxo-3,4-dihydro-2H-pyran-4-carboxylate (3e)**

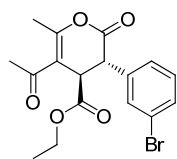

Yellow Liquid.  $[\alpha]_D^{20} = 85$  (*c* 1.0, CH<sub>2</sub>Cl<sub>2</sub>, 90% ee); IR(KBr): 691, 790, 1028, 1073, 1120, 1254, 1426, 1595, 1730, 1787, 2924, 3380 cm<sup>-1</sup>; <sup>1</sup>H NMR (400 MHz, CDCl<sub>3</sub>):  $\delta = 7.47$  (d, *J* = 8 Hz, 1H), 7.38 (s, 1H), 7.22 (t, *J* = 8 Hz, 1H), 7.14 (d, *J* = 7.6 Hz, 1H), 4.34 (d, *J* = 2.8 Hz, 1H), 4.21–4.16 (q, *J* = 7.2 Hz, 2H), 4.10 (d, *J* = 2 Hz, 1H), 2.36 (s, 3H), 2.33 (d, *J* = 0.8 Hz, 3H), 1.24 (t, *J* = 7.2 Hz, 3H); <sup>13</sup>C NMR (100 MHz, CDCl<sub>3</sub>):  $\delta = 196.5, 170.3, 164.7, 160.0, 136.0, 131.6, 130.7, 130.3, 125.4, 123.2, 112.9, 62.3, 45.33, 45.30, 30.3, 19.4, 13.9$ . The enantiomeric excess was determined by HPLC with an OD-H column. (*n*-hexane:*i*-PrOH = 90:10), 1 mL/min; minor enantiomer *t<sub>R</sub>* = 20.54 min, major enantiomer *t<sub>R</sub>* = 25.35 min. HRMS (ESI): [M+H]<sup>+</sup> calcd for [C<sub>17</sub>H<sub>17</sub>BrO<sub>5</sub>]: 381.0332, found: 381.0337.

**(3S,4R)-ethyl 5-acetyl-6-methyl-2-oxo-3-(*m*-tolyl)-3,4-dihydro-2H-pyran-4-carboxylate (3f)**

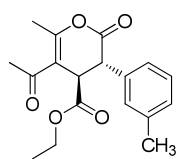

Yellow Liquid.  $[\alpha]_D^{20} = 56$  (*c* 1.0, CH<sub>2</sub>Cl<sub>2</sub>, 94% ee); IR(KBr): 737, 1024, 1155, 1262, 1362, 1462, 1608, 1732, 1788, 2926, 3196cm<sup>-1</sup>; <sup>1</sup>H NMR (400 MHz, CDCl<sub>3</sub>):  $\delta = 7.22$  (t, *J* = 7.6 Hz, 1H), 7.13(d, *J* = 7.2 Hz, 1H), 7.02 (s, 1H), 6.98 (d, *J* = 7.6 Hz, 1H), 4.33 (d, *J* = 2 Hz, 1H), 4.22–4.17 (q, *J* = 7.2 Hz, 2H), 4.10 (s, 1H), 2.33 (d, 9H), 1.24 (t, *J* = 7.2 Hz, 3H); <sup>13</sup>C NMR (100 MHz, CDCl<sub>3</sub>):  $\delta = 196.6, 170.6, 165.4, 160.2, 139.0, 133.8, 129.1, 129.0, 127.7, 123.6, 112.6, 62.1, 45.59, 45.58, 30.2, 21.4, 19.4, 13.9$ . The enantiomeric excess was determined by HPLC with an OJ-H column. (*n*-hexane:*i*-PrOH = 80:20), 1 mL/min; major enantiomer *t<sub>R</sub>* = 13.69 min, minor enantiomer *t<sub>R</sub>* = 18.97 min. HRMS (ESI): [M+H]<sup>+</sup> calcd for [C<sub>18</sub>H<sub>20</sub>O<sub>5</sub>]: 317.1384, found: 317.1389.

**(3S,4R)-ethyl**

**5-acetyl-3-(3-methoxyphenyl)-6-methyl-2-oxo-3,4-dihydro-2H-pyran-4-carboxylate (3g)**

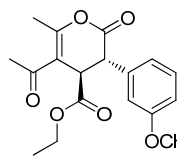

Yellow Liquid.  $[\alpha]_D^{20} = 38$  (*c* 1.0, CH<sub>2</sub>Cl<sub>2</sub>, 94% ee); IR(KBr): 737, 1044, 1155, 1263, 1362, 1459, 1601, 1730, 2926, 3195 cm<sup>-1</sup>; <sup>1</sup>H NMR (400 MHz, CDCl<sub>3</sub>):  $\delta = 7.26$  (t, *J* = 8 Hz, 1H), 6.86–6.83 (dd, *J* = 2.4 Hz, *J* = 4.4 Hz, 1H), 6.78–6.75 (m, 2H), 4.35 (d, *J* =



2 Hz, 1H), 4.23–4.17 (q,  $J = 7.2$  Hz, 2H), 4.12 (d,  $J = 1.2$  Hz, 1H), 3.78 (s, 3H), 2.35 (d, 6H), 1.25 (t,  $J = 7.2$  Hz, 3H);  $^{13}\text{C}$  NMR (100 MHz,  $\text{CDCl}_3$ ):  $\delta = 196.7, 170.5, 165.3, 160.2, 160.1, 135.3, 130.2, 129.0, 118.9, 113.6, 112.9, 112.7, 62.2, 55.3, 45.5, 45.4, 30.3, 19.4, 13.9$ . The enantiomeric excess was determined by HPLC with an OJ-H column. (*n*-hexane:*i*-PrOH = 80:20), 1 mL/min; major enantiomer  $t_{\text{R}} = 17.54$  min, minor enantiomer  $t_{\text{R}} = 21.70$  min. HRMS (ESI):  $[\text{M}+\text{H}]^+$  calcd for  $[\text{C}_{18}\text{H}_{20}\text{O}_6]$ : 333.1333, found: 333.1331.

**(3S,4R)-ethyl**

**5-acetyl-3-(4-fluorophenyl)-6-methyl-2-oxo-3,4-dihydro-2H-pyran-4-carboxylate (3h)**

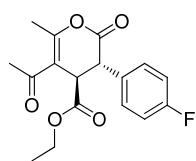

Yellow Liquid.  $[\alpha]_{\text{D}}^{20} = 20$  ( $c$  1.0,  $\text{CH}_2\text{Cl}_2$ , 90% ee); IR(KBr): 778, 1043, 1117, 1158, 1261, 1456, 1594, 1731, 2372, 2924, 3366  $\text{cm}^{-1}$ ;  $^1\text{H}$  NMR (400 MHz,  $\text{CDCl}_3$ ):  $\delta = 7.21\text{--}7.17$  (dd,  $J = 5.2$  Hz,  $J = 8.4$  Hz, 2H), 7.04(t, 2H), 4.34 (d,  $J = 2.8$  Hz, 1H), 4.21–4.16(q,  $J = 7.2$  Hz, 2H), 4.10 (d,  $J = 2$  Hz, 1H), 2.36 (s, 3H), 2.33 (s, 3H), 1.23 (t,  $J = 7.2$  Hz, 3H);  $^{13}\text{C}$  NMR (100 MHz,  $\text{CDCl}_3$ ):  $\delta = 196.6, 170.4, 165.2, 163.7, 161.3, 159.9, 129.59, 129.56, 128.8, 128.7, 116.3, 116.1, 112.9, 62.2, 45.4, 45.0, 30.3, 19.4, 13.9$ . The enantiomeric excess was determined by HPLC with an OJ-H column. (*n*-hexane:*i*-PrOH = 80:20), 1 mL/min; major enantiomer  $t_{\text{R}} = 14.31$  min, minor enantiomer  $t_{\text{R}} = 16.48$  min. HRMS (ESI):  $[\text{M}+\text{H}]^+$  calcd for  $[\text{C}_{17}\text{H}_{17}\text{FO}_5]$ : 321.1133, found: 321.1138.

**(3S,4R)-ethyl**

**5-acetyl-3-(4-chlorophenyl)-6-methyl-2-oxo-3,4-dihydro-2H-pyran-4-carboxylate (3i)**

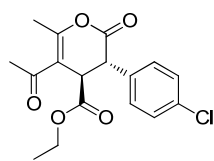

Yellow Liquid.  $[\alpha]_{\text{D}}^{20} = 51$  ( $c$  1.0,  $\text{CH}_2\text{Cl}_2$ , 90% ee); IR(KBr): 741, 798, 1022, 1094, 1261, 1460, 1599, 1732, 2372, 2962, 3374  $\text{cm}^{-1}$ ;  $^1\text{H}$  NMR (400 MHz,  $\text{CDCl}_3$ ):  $\delta = 7.34\text{--}7.32$  (dd,  $J = 2$  Hz,  $J = 6.8$  Hz, 2H), 7.04(d,  $J = 8.4$  Hz, 2H), 4.34 (d,  $J = 2.8$  Hz, 1H), 4.21–4.16 (q,  $J = 7.2$  Hz, 2H), 4.11–4.10 (dd,  $J = 0.8$  Hz,  $J = 2.8$  Hz, 1H), 2.36 (s, 3H), 2.32 (s, 3H), 1.24 (t,  $J = 7.2$  Hz, 3H);  $^{13}\text{C}$  NMR (100 MHz,  $\text{CDCl}_3$ ):  $\delta = 196.5, 170.3, 165.0, 159.9, 134.5, 132.3, 129.4, 128.3, 112.9, 62.2, 45.2, 45.1, 30.3, 19.4, 13.9$ . The enantiomeric excess was determined by HPLC with an AD-H column. (*n*-hexane:*i*-PrOH = 90:10), 1 mL/min; major enantiomer  $t_{\text{R}} = 14.19$  min, minor enantiomer  $t_{\text{R}} = 17.84$  min. HRMS (ESI):  $[\text{M}+\text{H}]^+$  calcd for  $[\text{C}_{17}\text{H}_{17}\text{ClO}_5]$ : 337.0837, found: 337.0842.

**(3S,4R)-ethyl**

**5-acetyl-3-(4-bromophenyl)-6-methyl-2-oxo-3,4-dihydro-2H-pyran-4-carboxylate (3j)**

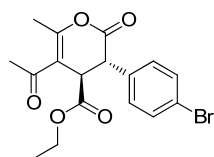

Yellow Liquid.  $[\alpha]_D^{20} = 63$  (*c* 1.0, CH<sub>2</sub>Cl<sub>2</sub>, 93% ee); IR(KBr): 739, 814, 1021, 1152, 1261, 1363, 1458, 1732, 1790, 2924, 3308 cm<sup>-1</sup>; <sup>1</sup>H NMR (400 MHz, CDCl<sub>3</sub>):  $\delta = 7.49$  (d, *J* = 8.8 Hz, 2H), 7.10(d, *J* = 8 Hz, 2H), 4.32 (d, *J* = 2.8 Hz, 1H), 4.21–4.16 (q, *J* = 7.2 Hz, 2H), 4.11 (d, *J* = 2 Hz, 1H), 2.36 (s, 3H), 2.32 (d, *J* = 0.4 Hz, 3H), 1.24 (t, *J* = 7.2 Hz, 3H); <sup>13</sup>C NMR (100 MHz, CDCl<sub>3</sub>):  $\delta = 196.5, 170.3, 164.9, 159.9, 132.8, 132.4, 128.6, 122.5, 112.9, 62.2, 45.2, 45.1, 30.3, 19.4, 13.9$ . The enantiomeric excess was determined by HPLC with an AD-H column. (*n*-hexane:*i*-PrOH = 95:5), 1 mL/min; major enantiomer *t*<sub>R</sub> = 26.67 min, minor enantiomer *t*<sub>R</sub> = 33.20 min. HRMS (ESI): [M+H]<sup>+</sup> calcd for [C<sub>17</sub>H<sub>17</sub>BrO<sub>5</sub>]: 381.0332, found: 381.0337.

**(3S,4R)-ethyl 5-acetyl-6-methyl-2-oxo-3-(p-tolyl)-3,4-dihydro-2H-pyran-4-carboxylate (3k)**

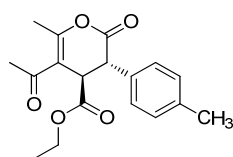

Yellow Liquid.  $[\alpha]_D^{20} = 111$  (*c* 1.0, CH<sub>2</sub>Cl<sub>2</sub>, 95% ee); IR(KBr): 737, 809, 1025, 1117, 1259, 1378, 1459, 1611, 1733, 1787, 2925, 3444 cm<sup>-1</sup>; <sup>1</sup>H NMR (400 MHz, CDCl<sub>3</sub>):  $\delta = 7.15$  (d, *J* = 8 Hz, 2H), 7.09 (d, *J* = 8 Hz, 2H), 4.33 (d, *J* = 2.4 Hz, 1H), 4.22–4.16 (q, *J* = 7.2 Hz, 2H), 4.09 (d, *J* = 1.6 Hz, 1H), 2.33 (d, 9H), 1.24 (t, *J* = 7.2 Hz, 3H); <sup>13</sup>C NMR (100 MHz, CDCl<sub>3</sub>):  $\delta = 196.7, 170.6, 165.5, 160.2, 138.2, 130.8, 129.9, 126.7, 112.6, 62.1, 45.6, 45.3, 30.2, 21.0, 19.4, 13.9$ . The enantiomeric excess was determined by HPLC with an OJ-H column. (*n*-hexane:*i*-PrOH = 80:20), 1 mL/min; major enantiomer *t*<sub>R</sub> = 12.74 min, minor enantiomer *t*<sub>R</sub> = 14.11 min. HRMS (ESI): [M+H]<sup>+</sup> calcd for [C<sub>18</sub>H<sub>20</sub>O<sub>5</sub>]: 317.1384, found: 317.1381.

**(3S,4R)-ethyl**

**5-acetyl-3-(4-methoxyphenyl)-6-methyl-2-oxo-3,4-dihydro-2H-pyran-4-carboxylate (3l)**

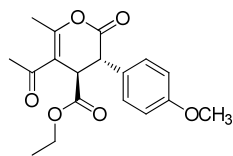

Yellow Liquid.  $[\alpha]_D^{20} = 133$  (*c* 1.0, CH<sub>2</sub>Cl<sub>2</sub>, 95% ee); IR(KBr): 738, 1036, 1117, 1222, 1362, 1459, 1604, 1714, 2924, 3405 cm<sup>-1</sup>; <sup>1</sup>H NMR (400 MHz, CDCl<sub>3</sub>):  $\delta = 7.13$  (d, *J* = 8.8 Hz, 2H), 6.87–6.85 (dd, *J* = 2 Hz, *J* = 6.4 Hz, 2H), 4.31 (d, *J* = 2.4 Hz, 1H),

4.21–4.16 (q,  $J = 7.2$  Hz, 2H), 4.07 (d,  $J = 1.6$  Hz, 1H), 3.79 (s, 3H), 2.34–2.32 (m, 6H), 1.24 (t,  $J = 7.2$  Hz, 3H);  $^{13}\text{C}$  NMR (100 MHz,  $\text{CDCl}_3$ ):  $\delta = 196.8, 170.6, 165.6, 160.1, 159.5, 128.0, 125.7, 114.6, 112.7, 62.1, 55.3, 45.6, 44.9, 30.2, 19.4, 13.9$ . The enantiomeric excess was determined by HPLC with an OJ-H column. (*n*-hexane:*i*-PrOH = 80:20), 1 mL/min; major enantiomer  $t_{\text{R}} = 24.64$  min, minor enantiomer  $t_{\text{R}} = 31.60$  min. HRMS (ESI):  $[\text{M}+\text{H}]^+$  calcd for  $[\text{C}_{18}\text{H}_{20}\text{O}_6]$ : 333.1333, found: 333.1329.

**(3S,4R)-ethyl**

**5-acetyl-3-(4-ethoxyphenyl)-6-methyl-2-oxo-3,4-dihydro-2H-pyran-4-carboxylate (3m)**

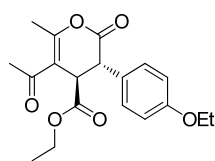

Yellow Liquid.  $[\alpha]_{\text{D}}^{20} = 91$  ( $c$  1.0,  $\text{CH}_2\text{Cl}_2$ , 98% ee); IR(KBr): 825, 1044, 1149, 1252, 1365, 1513, 1612, 1732, 1788, 2926, 2960  $\text{cm}^{-1}$ ;  $^1\text{H}$  NMR (400 MHz,  $\text{CDCl}_3$ ):  $\delta = 7.11$  (d,  $J = 8.8$  Hz, 2H), 6.86 (d,  $J = 8.8$  Hz, 2H), 4.30 (d,  $J = 2.4$  Hz, 1H), 4.21–4.16 (q,  $J = 7.2$  Hz, 2H), 4.07 (d,  $J = 1.6$  Hz, 1H), 4.03–3.98 (q,  $J = 7.2$  Hz, 2H), 2.34 (d, 6H), 1.40 (t,  $J = 7.2$  Hz, 3H), 1.24 (t,  $J = 7.2$  Hz, 3H);  $^{13}\text{C}$  NMR (100 MHz,  $\text{CDCl}_3$ ):  $\delta = 196.8, 170.7, 165.6, 160.2, 158.8, 128.0, 125.5, 115.1, 112.7, 63.5, 62.1, 45.6, 44.9, 30.2, 19.4, 14.7, 13.9$ . The enantiomeric excess was determined by HPLC with an OJ-H column. (*n*-hexane:*i*-PrOH = 80:20), 1 mL/min; major enantiomer  $t_{\text{R}} = 16.66$  min, minor enantiomer  $t_{\text{R}} = 21.09$  min. HRMS (ESI):  $[\text{M}+\text{H}]^+$  calcd for  $[\text{C}_{19}\text{H}_{22}\text{O}_6]$ : 347.1489, found: 347.1493.

**(3S,4R)-ethyl**

**5-acetyl-6-methyl-2-oxo-3-(4-pentylphenyl)-3,4-dihydro-2H-pyran-4-carboxylate (3n)**

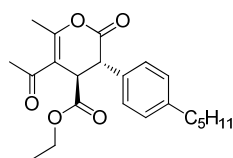

Yellow Liquid.  $[\alpha]_{\text{D}}^{20} = 44$  ( $c$  1.0,  $\text{CH}_2\text{Cl}_2$ , 97% ee); IR(KBr): 739, 1039, 1119, 1155, 1261, 1422, 1595, 1731, 2373, 2925, 3346  $\text{cm}^{-1}$ ;  $^1\text{H}$  NMR (400 MHz,  $\text{CDCl}_3$ ):  $\delta = 7.16$  (d,  $J = 8$  Hz, 2H), 7.10 (d,  $J = 8$  Hz, 2H), 4.33 (d,  $J = 2$  Hz, 1H), 4.22–4.16 (q,  $J = 7.2$  Hz, 2H), 4.08 (d,  $J = 1.6$  Hz, 1H), 2.57 (t,  $J = 8$  Hz, 2H), 2.32 (m, 6H), 1.62–1.55 (m, 2H), 1.37–1.27 (m, 4H), 1.24 (t,  $J = 7.2$  Hz, 3H), 0.88 (t,  $J = 6.8$  Hz, 3H);  $^{13}\text{C}$  NMR (100 MHz,  $\text{CDCl}_3$ ):  $\delta = 196.7, 170.6, 165.5, 160.2, 143.2, 131.0, 129.2, 126.7, 112.6, 62.1, 45.6, 45.3, 35.4, 31.4, 30.9, 30.2, 22.4, 19.4, 13.93, 13.91$ . The enantiomeric excess was determined by HPLC with an OD-H column. (*n*-hexane:*i*-PrOH = 92:8), 1 mL/min; minor enantiomer  $t_{\text{R}} = 9.61$  min, major enantiomer  $t_{\text{R}} = 12.01$  min. HRMS (ESI):  $[\text{M}+\text{H}]^+$  calcd for  $[\text{C}_{22}\text{H}_{28}\text{O}_5]$ : 373.2010, found: 373.2007.

**(3S,4R)-ethyl  
5-acetyl-3-(4-cyclohexylphenyl)-6-methyl-2-oxo-3,4-dihydro-2H-pyran-4-carboxylate (3o)**

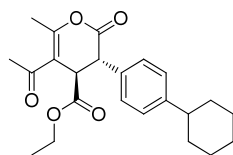

Yellow Liquid.  $[\alpha]_D^{20} = 190$  (*c* 1.0, CH<sub>2</sub>Cl<sub>2</sub>, 96% ee); IR(KBr): 737, 1057, 1148, 1251, 1362, 1448, 1644, 1733, 1788, 2926, 3373 cm<sup>-1</sup>; <sup>1</sup>H NMR (400 MHz, CDCl<sub>3</sub>):  $\delta = 7.18$  (d, *J* = 8.4 Hz, 2H), 7.12(d, *J* = 8.4 Hz, 2H), 4.33 (d, *J* = 2.4 Hz, 1H), 4.21–4.16 (q, *J* = 7.2 Hz, 2H), 4.09 (d, *J* = 1.6 Hz, 1H), 2.50 (d, *J* = 10.4 Hz, 1H), 2.34 (d, 6H), 1.84 (d, *J* = 8 Hz, 4H), 1.54 (d, *J* = 8.8 Hz, 1H), 1.42–1.32 (m, 4H), 1.21–1.21 (m, 4H); <sup>13</sup>C NMR (100 MHz, CDCl<sub>3</sub>):  $\delta = 196.7, 170.6, 165.5, 160.2, 148.2, 131.1, 127.6, 126.7, 112.5, 62.0, 45.5, 45.3, 44.0, 34.2, 30.2, 26.7, 26.0, 19.4, 13.9$ . The enantiomeric excess was determined by HPLC with an OD-H column. (*n*-hexane:*i*-PrOH = 95:5), 1 mL/min; minor enantiomer *t*<sub>R</sub> = 16.08 min, major enantiomer *t*<sub>R</sub> = 21.30 min. HRMS (ESI): [M+H]<sup>+</sup> calcd for [C<sub>23</sub>H<sub>28</sub>O<sub>5</sub>]: 385.2010, found: 385.2011.

**(3S,4R)-ethyl  
5-acetyl-3-(3,4-dimethylphenyl)-6-methyl-2-oxo-3,4-dihydro-2H-pyran-4-carboxylate (3p)**

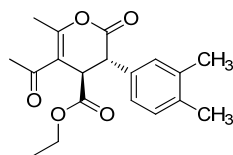

Yellow Liquid.  $[\alpha]_D^{20} = 152$  (*c* 1.0, CH<sub>2</sub>Cl<sub>2</sub>, 96% ee); IR(KBr): 737, 1040, 1148, 1381, 1454, 1609, 1732, 1789, 2375, 2924, 3348 cm<sup>-1</sup>; <sup>1</sup>H NMR (400 MHz, CDCl<sub>3</sub>):  $\delta = 7.09$  (d, *J* = 8 Hz, 1H), 6.96 (s, 1H), 6.88 (d, *J* = 1.6 Hz, 1H), 4.30 (d, *J* = 2 Hz, 1H), 4.22–4.17 (q, *J* = 7.2 Hz, 2H), 4.08 (d, *J* = 1.2 Hz, 1H), 2.33 (d, 6H), 2.23 (s, 6H), 1.25 (t, *J* = 7.2 Hz, 3H); <sup>13</sup>C NMR (100 MHz, CDCl<sub>3</sub>):  $\delta = 196.7, 170.7, 165.6, 160.3, 137.5, 136.8, 131.1, 130.3, 128.1, 123.8, 112.5, 62.1, 45.6, 45.2, 30.2, 19.8, 19.4, 19.3, 13.9$ . The enantiomeric excess was determined by HPLC with an OJ-H column. (*n*-hexane:*i*-PrOH = 80:20), 1 mL/min; major enantiomer *t*<sub>R</sub> = 12.81 min, minor enantiomer *t*<sub>R</sub> = 15.79 min. HRMS (ESI): [M+H]<sup>+</sup> calcd for [C<sub>19</sub>H<sub>22</sub>O<sub>5</sub>]: 331.1540, found: 331.1538.

**(3S,4R)-ethyl  
5-acetyl-3-(3,4-dimethoxyphenyl)-6-methyl-2-oxo-3,4-dihydro-2H-pyran-4-carboxylate (3q)**

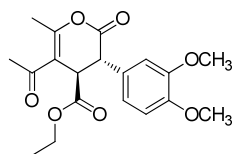

Yellow Liquid.  $[\alpha]_D^{20} = 114$  (*c* 1.0, CH<sub>2</sub>Cl<sub>2</sub>, 96% ee); IR(KBr): 774, 1043, 1117, 1190, 1421, 1596, 1786, 2375, 2924, 3344 cm<sup>-1</sup>; <sup>1</sup>H NMR (400 MHz, CDCl<sub>3</sub>):  $\delta = 6.28$  (d, *J* = 8.4 Hz, 1H), 6.74 (t, 2H), 4.32 (d, *J* = 2 Hz, 1H), 4.22–4.17 (q, *J* = 7.2 Hz, 2H), 4.13 (s,

1H), 3.86 (d, 6H), 2.37 (s, 3H), 2.31 (s, 3H), 1.25 (t,  $J = 7.2$  Hz, 3H);  $^{13}\text{C}$  NMR (100 MHz,  $\text{CDCl}_3$ ):  $\delta = 196.8, 170.6, 165.6, 159.9, 149.4, 149.0, 125.9, 118.9, 113.0, 111.5, 110.3, 62.1, 55.9, 55.88, 45.1, 45.0, 30.3, 19.4, 14.0$ . The enantiomeric excess was determined by HPLC with an OJ-H column. (*n*-hexane:*i*-PrOH = 80:20), 1 mL/min; major enantiomer  $t_{\text{R}} = 29.38$  min, minor enantiomer  $t_{\text{R}} = 35.93$  min. HRMS (ESI):  $[\text{M}+\text{H}]^+$  calcd for  $[\text{C}_{19}\text{H}_{22}\text{O}_7]$ : 363.1438, found: 363.1442.

**(3S,4R)-ethyl**

**5-acetyl-6-methyl-3-(naphthalen-2-yl)-2-oxo-3,4-dihydro-2H-pyran-4-carboxylate (3r)**

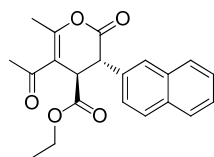

Yellow Liquid.  $[\alpha]_{\text{D}}^{20} = 92$  ( $c$  1.0,  $\text{CH}_2\text{Cl}_2$ , 96% ee); IR(KBr): 738, 1038, 1149, 1261, 1362, 1605, 1731, 1787, 2371, 2927, 3298  $\text{cm}^{-1}$ ;  $^1\text{H}$  NMR (400 MHz,  $\text{CDCl}_3$ ):  $\delta = 7.82\text{--}7.76$  (m, 3H), 7.61 (s, 1H), 7.25–7.48 (m, 2H), 7.36–7.34 (dd,  $J = 1.6$  Hz,  $J = 6$  Hz, 1H), 4.54 (d,  $J = 2.4$  Hz, 1H), 4.27 (d,  $J = 1.6$  Hz, 1H), 4.23–4.18 (q,  $J = 7.2$  Hz, 2H), 2.33 (s, 6H), 1.24 (t,  $J = 7.2$  Hz, 3H);  $^{13}\text{C}$  NMR (100 MHz,  $\text{CDCl}_3$ ):  $\delta = 196.6, 170.6, 165.4, 160.2, 133.2, 132.8, 131.1, 129.2, 127.9, 127.6, 126.7, 126.6, 125.9, 124.4, 112.8, 62.1, 45.8, 45.4, 30.3, 19.4, 13.9$ . The enantiomeric excess was determined by HPLC with an OJ-H column. (*n*-hexane:*i*-PrOH = 80:20), 1 mL/min; major enantiomer  $t_{\text{R}} = 40.64$  min, minor enantiomer  $t_{\text{R}} = 63.10$  min. HRMS (ESI):  $[\text{M}+\text{H}]^+$  calcd for  $[\text{C}_{21}\text{H}_{20}\text{O}_5]$ : 353.1384, found: 353.1386.

**(3S,4R)-benzyl**

**5-acetyl-3-(4-methoxyphenyl)-6-methyl-2-oxo-3,4-dihydro-2H-pyran-4-carboxylate (3s)**

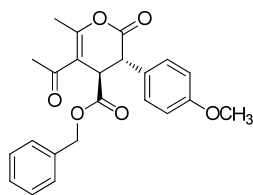

Yellow Liquid.  $[\alpha]_{\text{D}}^{20} = 115$  ( $c$  1.0,  $\text{CH}_2\text{Cl}_2$ , 96% ee); IR(KBr): 787, 1042, 1117, 1260, 1422, 1596, 1786, 2370, 2924, 3363  $\text{cm}^{-1}$ ;  $^1\text{H}$  NMR (400 MHz,  $\text{CDCl}_3$ ):  $\delta = 7.39\text{--}7.32$  (m, 3H), 7.31–7.25 (m, 2H), 7.11 (d,  $J = 8.4$  Hz, 2H), 6.85–6.83 (m, 2H), 5.15 (s, 2H), 4.31 (d,  $J = 2.8$  Hz, 1H), 4.14–4.13 (m, 1H), 3.77 (s, 3H), 2.29 (d,  $J = 0.8$  Hz, 3H), 2.27 (s, 3H);  $^{13}\text{C}$  NMR (100 MHz,  $\text{CDCl}_3$ ):  $\delta = 196.6, 170.5, 165.5, 160.1, 159.5, 134.9, 128.6, 128.5, 128.2, 128.0, 125.6, 114.6, 112.7, 67.7, 55.2, 45.5, 44.9, 30.2, 19.4$ . The enantiomeric excess was determined by HPLC with an OD-H column. (*n*-hexane:*i*-PrOH = 80:20), 1 mL/min; minor enantiomer  $t_{\text{R}} = 27.13$  min, major enantiomer  $t_{\text{R}} = 29.99$  min. HRMS (ESI):  $[\text{M}+\text{H}]^+$  calcd for  $[\text{C}_{23}\text{H}_{22}\text{O}_6]$ : 395.1489, found: 395.1494.

**(3S,4R)-4-ethyl-5-methyl****3-(4-methoxyphenyl)-6-methyl-2-oxo-3,4-dihydro-2H-pyran-4,5-dicarboxylate (3t)**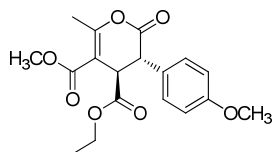

Yellow Liquid.  $[\alpha]_D^{20} = 108$  ( $c$  1.0,  $\text{CH}_2\text{Cl}_2$ , 95% ee); IR(KBr): 795, 1032, 1149, 1259, 1379, 1462, 1514, 1655, 1726, 1788, 2956, 3434  $\text{cm}^{-1}$ ;  $^1\text{H}$  NMR (400 MHz,  $\text{CDCl}_3$ ):  $\delta = 7.15$  (d,  $J = 8.8$  Hz, 2H), 6.88 (d,  $J = 8.8$  Hz, 2H), 4.26 (d,  $J = 2.8$  Hz, 1H), 4.19–4.14 (m, 2H), 4.10–4.09 (m, 1H), 3.79 (s, 3H), 3.77 (s, 3H), 2.38 (d,  $J = 0.8$  Hz, 3H), 1.24 (t,  $J = 7.2$  Hz, 3H);  $^{13}\text{C}$  NMR (100 MHz,  $\text{CDCl}_3$ ):  $\delta = 170.8$ , 165.9, 165.7, 162.0, 159.4, 128.2, 125.7, 114.5, 104.1, 61.8, 55.2, 52.0, 45.2, 45.1, 18.8, 13.9. The enantiomeric excess was determined by HPLC with an OD-H column. ( $n$ -hexane: $i$ -PrOH = 90:10), 1 mL/min; major enantiomer  $t_R = 14.51$  min, minor enantiomer  $t_R = 19.87$  min. HRMS (ESI):  $[\text{M}+\text{H}]^+$  calcd for  $[\text{C}_{18}\text{H}_{20}\text{O}_7]$ : 349.1282, found: 349.1286.

**(3S,4R)-diethyl****3-(4-methoxyphenyl)-6-methyl-2-oxo-3,4-dihydro-2H-pyran-4,5-dicarboxylate (3u)**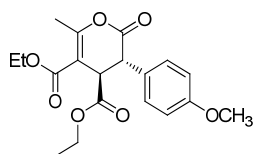

Yellow Liquid.  $[\alpha]_D^{20} = 115$  ( $c$  1.0,  $\text{CH}_2\text{Cl}_2$ , 96% ee); IR(KBr): 799, 1072, 1260, 1376, 1461, 1611, 1655, 1721, 1787, 2923, 3371  $\text{cm}^{-1}$ ;  $^1\text{H}$  NMR (400 MHz,  $\text{CDCl}_3$ ):  $\delta = 7.16$  (d,  $J = 7.6$  Hz, 2H), 6.88 (d,  $J = 8.8$  Hz, 2H), 4.29–4.10 (m, 6H), 3.79 (s, 3H), 2.38 (d,  $J = 0.8$  Hz, 3H), 1.30 (t,  $J = 7.2$  Hz, 3H), 1.21 (t,  $J = 7.2$  Hz, 3H);  $^{13}\text{C}$  NMR (100 MHz,  $\text{CDCl}_3$ ):  $\delta = 170.9$ , 165.9, 165.4, 161.7, 159.4, 128.2, 125.7, 114.4, 104.4, 61.8, 61.1, 55.2, 45.3, 45.0, 18.7, 14.1, 13.9. The enantiomeric excess was determined by HPLC with an OD-H column. ( $n$ -hexane: $i$ -PrOH = 90:10), 1 mL/min; major enantiomer  $t_R = 13.34$  min, minor enantiomer  $t_R = 19.39$  min. HRMS (ESI):  $[\text{M}+\text{H}]^+$  calcd for  $[\text{C}_{19}\text{H}_{22}\text{O}_7]$ : 363.1438, found: 363.1444.

**(3S,4R)-4-(4-chlorobenzyl) 5-ethyl****3-(3,4-dimethoxyphenyl)-6-methyl-2-oxo-3,4-dihydro-2H-pyran-4,5-dicarboxylate (3v)**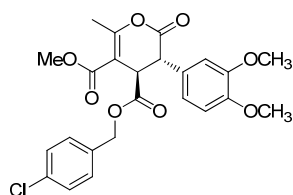

Yellow Liquid.  $[\alpha]_D^{20} = 69$  ( $c$  1.0,  $\text{CH}_2\text{Cl}_2$ , 83% ee); IR(KBr): 801, 1076, 1261, 1460, 1597, 1688, 1735, 1786, 2369, 2925, 3371  $\text{cm}^{-1}$ ;  $^1\text{H}$  NMR (400 MHz,

CDCl<sub>3</sub>):  $\delta$  = 7.33–7.29 (m, 2H), 7.20 (d,  $J$  = 8.4 Hz, 2H), 6.80 (d,  $J$  = 8.4 Hz, 1H), 6.75–6.69 (m, 2H), 5.09 (s, 2H), 4.26 (d,  $J$  = 3.6 Hz, 1H), 4.12–4.20 (m, 1H), 3.85 (s, 3H), 3.84 (s, 3H), 3.72 (s, 3H), 2.36 (s, 3H); <sup>13</sup>C NMR (100 MHz, CDCl<sub>3</sub>):  $\delta$  = 170.5, 165.7, 165.5, 161.9, 149.1, 148.9, 134.2, 133.5, 129.3, 128.6, 125.5, 119.0, 111.2, 110.2, 104.1, 66.4, 55.72, 55.7, 52.0, 45.2, 44.7, 18.7. The enantiomeric excess was determined by HPLC with an OD-H column. (*n*-hexane:*i*-PrOH = 80:20), 1 mL/min; major enantiomer  $t_R$  = 34.98 min, minor enantiomer  $t_R$  = 54.46 min. HRMS (ESI): [M+Na]<sup>+</sup> calcd for [C<sub>24</sub>H<sub>23</sub>Cl<sub>1</sub>O<sub>8</sub>]: 497.0974, found: 497.0982.

**(3S,4S)-5-acetyl-6-methyl-3,4-diphenyl-3,4-dihydro-2H-pyran-2-one (3w)**

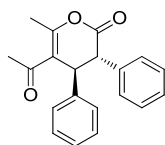

Pale Yellow Liquid.  $[\alpha]_D^{20}$  = 23 (*c* 1.0, CH<sub>2</sub>Cl<sub>2</sub>, 71% ee); IR(KBr): 740, 1042, 1140, 1268, 1356, 1621, 1740, 1785, 2375, 2933, 3331 cm<sup>-1</sup>; <sup>1</sup>H NMR (400 MHz, CDCl<sub>3</sub>):  $\delta$  = 7.38–7.28 (m, 6H), 7.24 (d,  $J$  = 7.2 Hz, 2H), 7.19 (d,  $J$  = 7.2 Hz, 2H), 4.35 (s, 1H), 4.10 (d,  $J$  = 2.4 Hz, 1H), 2.42 (s, 3H), 2.09 (s, 3H); <sup>13</sup>C NMR (100 MHz, CDCl<sub>3</sub>):  $\delta$  = 197.8, 166.2, 159.3, 139.6, 135.5, 129.5, 129.2, 128.2, 128.0, 127.0, 126.9, 115.9, 52.9, 46.4, 30.0, 18.9. The enantiomeric excess was determined by HPLC with an AD-H column. (*n*-hexane:*i*-PrOH = 90:10), 1 mL/min; minor enantiomer  $t_R$  = 13.90 min, major enantiomer  $t_R$  = 19.88 min. HRMS (ESI): [M+Na]<sup>+</sup> calcd for [C<sub>20</sub>H<sub>18</sub>O<sub>3</sub>]: 329.1172, found: 329.1159.

**(3R,4R)-4-chlorobenzyl 5-acetyl-3,6-dimethyl-2-oxo-3,4-dihydro-2H-pyran-4-carboxylate (3x)**

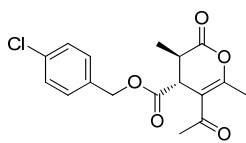

Pale Yellow Liquid.  $[\alpha]_D^{20}$  = 42 (*c* 1.0, CH<sub>2</sub>Cl<sub>2</sub>, 88% ee); IR(KBr): 738, 1038, 1134, 1270, 1364, 1618, 1752, 1780, 2369, 2938, 3340 cm<sup>-1</sup>; <sup>1</sup>H NMR (400 MHz, CDCl<sub>3</sub>):  $\delta$  = 7.36–7.32 (m, 2H), 7.25 (d,  $J$  = 8.8 Hz, 2H), 5.10 (s, 2H), 3.64 (d,  $J$  = 2.4 Hz, 1H), 3.15–3.09 (qd,  $J$  = 3.2 Hz,  $J$  = 4 Hz, 1H), 2.36 (s, 3H), 2.33 (s, 3H), 1.29 (d,  $J$  = 7.2 Hz, 3H); <sup>13</sup>C NMR (100 MHz, CDCl<sub>3</sub>):  $\delta$  = 196.8, 170.7, 167.7, 160.1, 134.4, 133.4, 129.6, 128.8, 111.9, 66.6, 45.8, 35.3, 30.3, 19.4, 15.3. The enantiomeric excess was determined by HPLC with an AS-H column. (*n*-hexane:*i*-PrOH = 85:15), 1 mL/min; minor enantiomer  $t_R$  = 29.03 min, major enantiomer  $t_R$  = 34.01 min. HRMS (ESI): [M+Na]<sup>+</sup> calcd for [C<sub>17</sub>H<sub>17</sub>ClO<sub>5</sub>]: 359.0657, found: 359.0672.

**(1R,4S,5R,6R)-ethyl**

**6-acetyl-1-methyl-3-oxo-4-phenyl-2,7-dioxabicyclo[4.1.0]heptane-5-carboxylate (6a)**

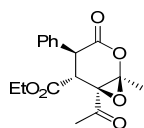

Pale Yellow Liquid.  $[\alpha]_D^{20} = 39$  ( $c$  1.0,  $\text{CH}_2\text{Cl}_2$ , 95% ee); IR(KBr): 749, 1028, 1155, 1262, 1383, 1598, 1730, 2373, 2924, 3364  $\text{cm}^{-1}$ ;  $^1\text{H}$  NMR (400 MHz,  $\text{CDCl}_3$ ):  $\delta = 7.37\text{--}7.29$  (m, 3H), 7.21 (d,  $J = 6.8$  Hz, 2H), 4.37 (d,  $J = 2.4$  Hz, 1H), 4.22–4.17 (q,  $J = 7.2$  Hz, 2H), 4.11 (d,  $J = 1.2$  Hz, 1H), 2.33 (d, 6H), 1.24 (t,  $J = 7.2$  Hz, 3H);  $^{13}\text{C}$  NMR (100 MHz,  $\text{CDCl}_3$ ):  $\delta = 196.7, 170.6, 165.4, 160.2, 133.9, 129.2, 129.15, 128.4, 126.9, 112.7, 62.2, 45.7, 45.6, 30.2, 19.4, 13.9$ . The enantiomeric excess was determined by HPLC with an OJ-H column. ( $n$ -hexane: $i$ -PrOH = 80:20), 1 mL/min; major enantiomer  $t_R = 15.36$  min, minor enantiomer  $t_R = 17.89$  min. HRMS (ESI):  $[\text{M}+\text{Na}]^+$  calcd for  $[\text{C}_{17}\text{H}_{18}\text{O}_6]$ : 341.0996, found: 341.0995.



## 5. X-ray Crystallographic Data

### X-ray Crystallographic Data of Compound 4d

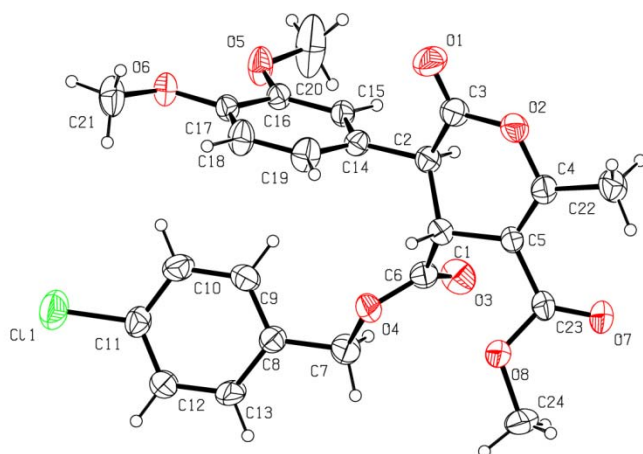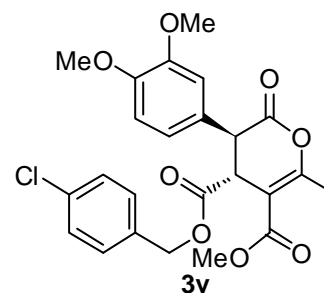

CCDC 1037041

|                                     |                                                    |                                                               |
|-------------------------------------|----------------------------------------------------|---------------------------------------------------------------|
| Bond precision:                     | C-C = 0.0060 Å                                     | Wavelength=0.71073                                            |
| Cell:                               | a=9.2814(16)      b=11.7110(17)      c=12.1339(13) | alpha=113.081(12)      beta=96.350(11)      gamma=102.204(14) |
| Temperature:                        | 292 K                                              |                                                               |
|                                     | Calculated                                         | Reported                                                      |
| Volume                              | 1158.1(3)                                          | 1158.1(3)                                                     |
| Space group                         | P -1                                               | P -1                                                          |
| Hall group                          | -P 1                                               | -P 1                                                          |
| Moiety formula                      | C <sub>24</sub> H <sub>23</sub> Cl O <sub>8</sub>  | C <sub>24</sub> H <sub>23</sub> Cl O <sub>8</sub>             |
| Sum formula                         | C <sub>24</sub> H <sub>23</sub> Cl O <sub>8</sub>  | C <sub>24</sub> H <sub>23</sub> Cl O <sub>8</sub>             |
| Mr                                  | 474.87                                             | 474.87                                                        |
| D <sub>x</sub> , g cm <sup>-3</sup> | 1.362                                              | 1.362                                                         |
| Z                                   | 2                                                  | 2                                                             |
| Mu (mm <sup>-1</sup> )              | 0.212                                              | 0.212                                                         |
| F <sub>000</sub>                    | 496.0                                              | 496.0                                                         |
| F <sub>000</sub> '                  | 496.58                                             |                                                               |
| h,k,lmax                            | 11,14,14                                           | 11,14,14                                                      |
| Nref                                | 4569                                               | 4553                                                          |
| Tmin,Tmax                           | 0.948,0.954                                        | 0.975,1.000                                                   |
| Tmin'                               | 0.948                                              |                                                               |
| Correction method=                  | MULTI-SCAN                                         |                                                               |
| Data completeness=                  | 0.996                                              | Theta(max)= 26.020                                            |
| R(reflections)=                     | 0.0652( 2049)                                      | wR2(reflections)= 0.1818( 4553)                               |
| S =                                 | 1.030                                              | Npar= 302                                                     |

## 6. NMR and HPLC spectrogram

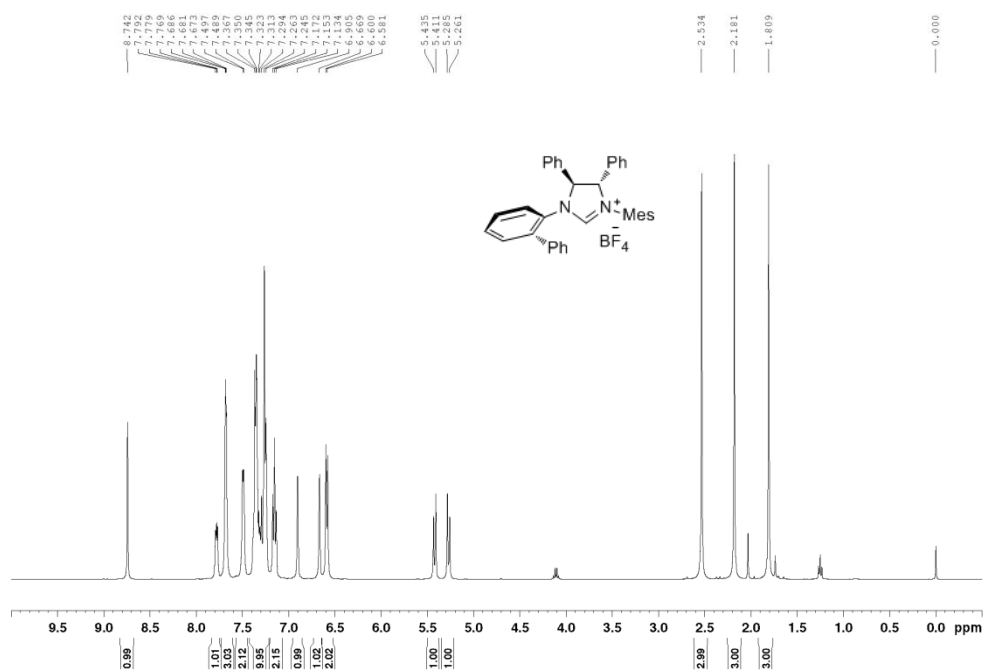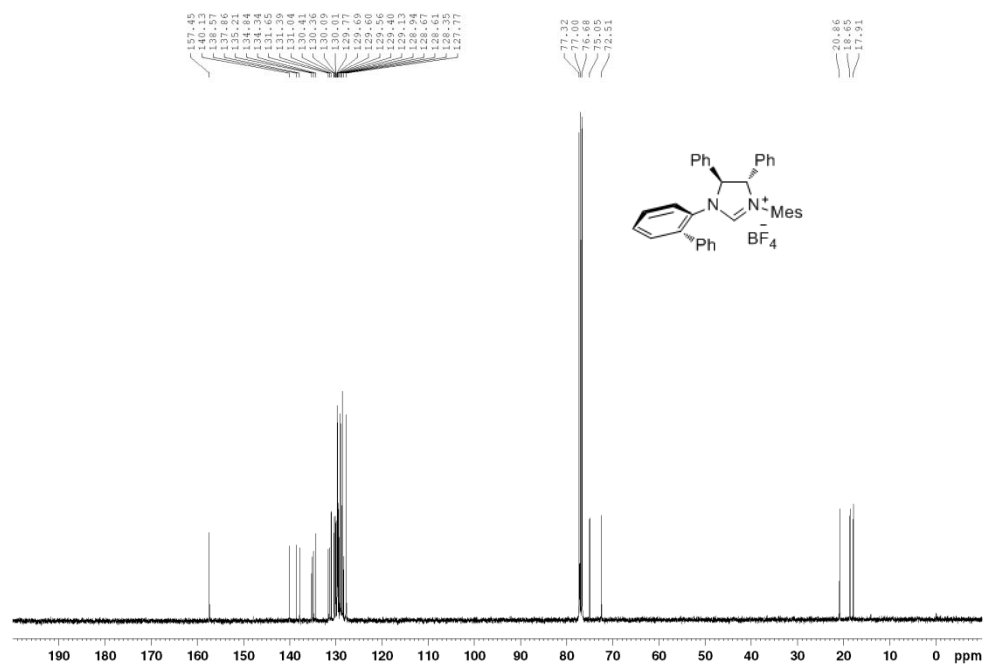

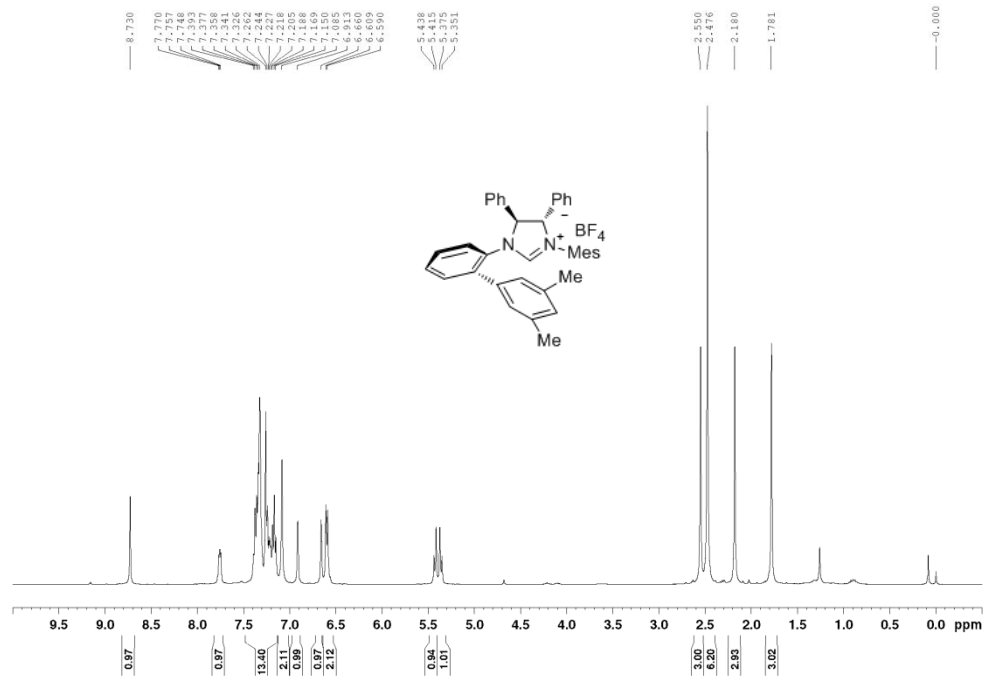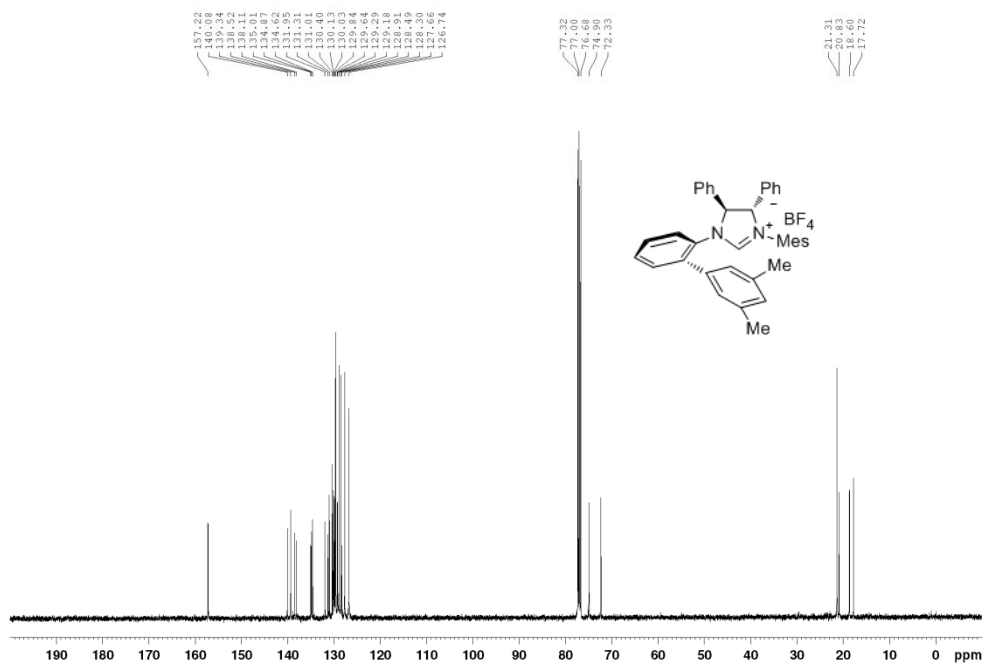

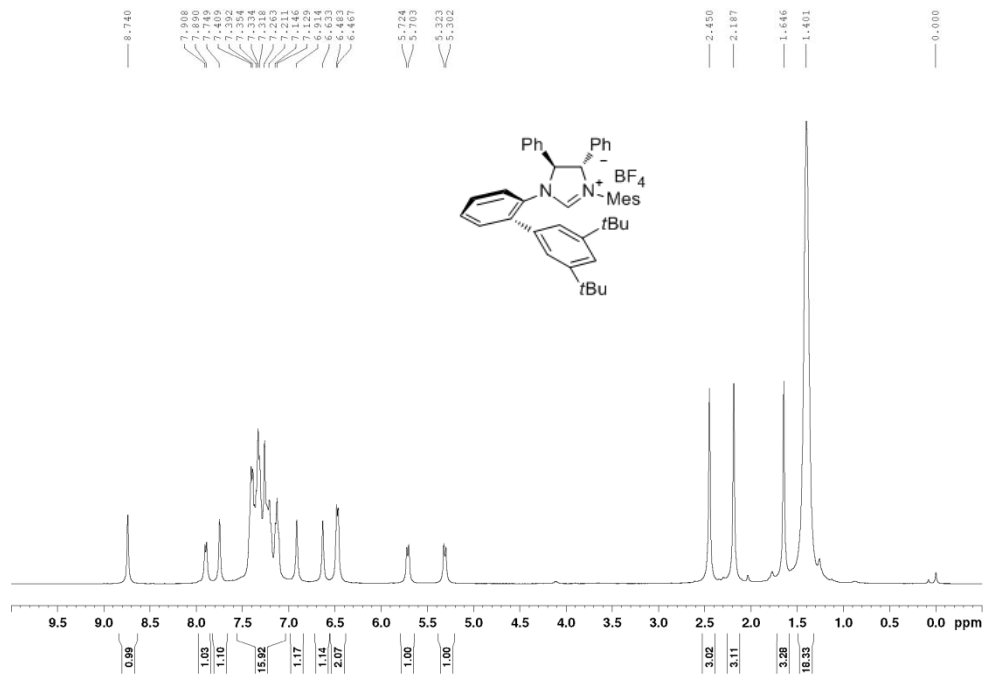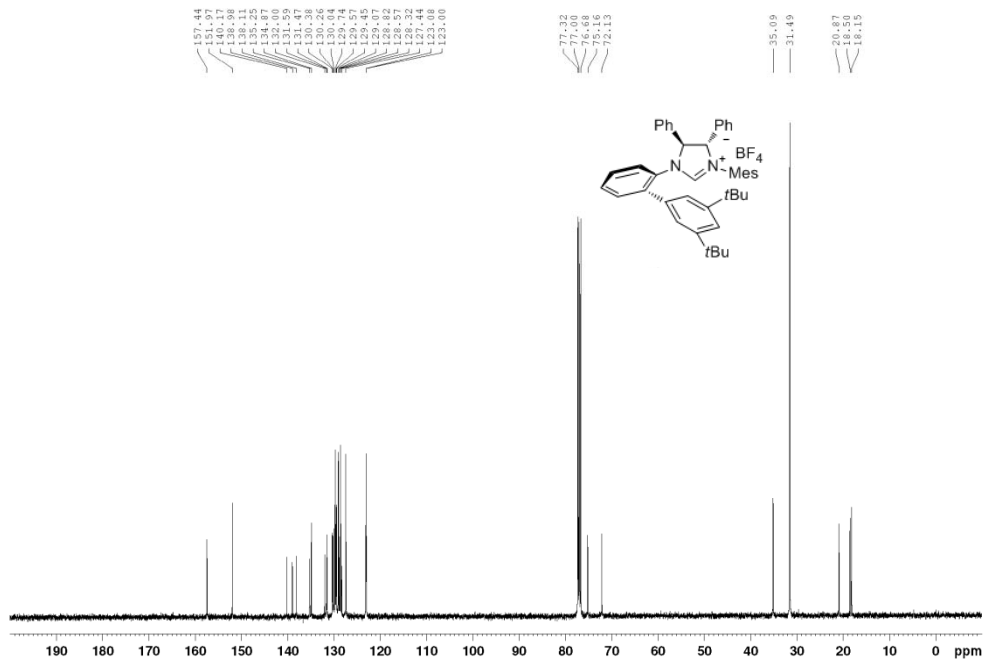

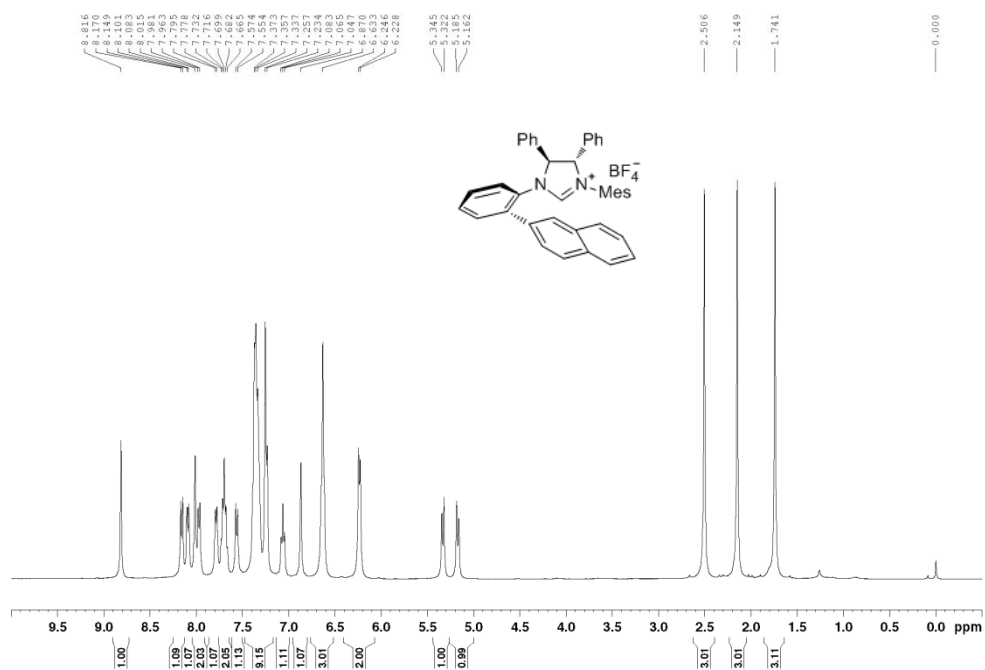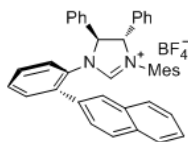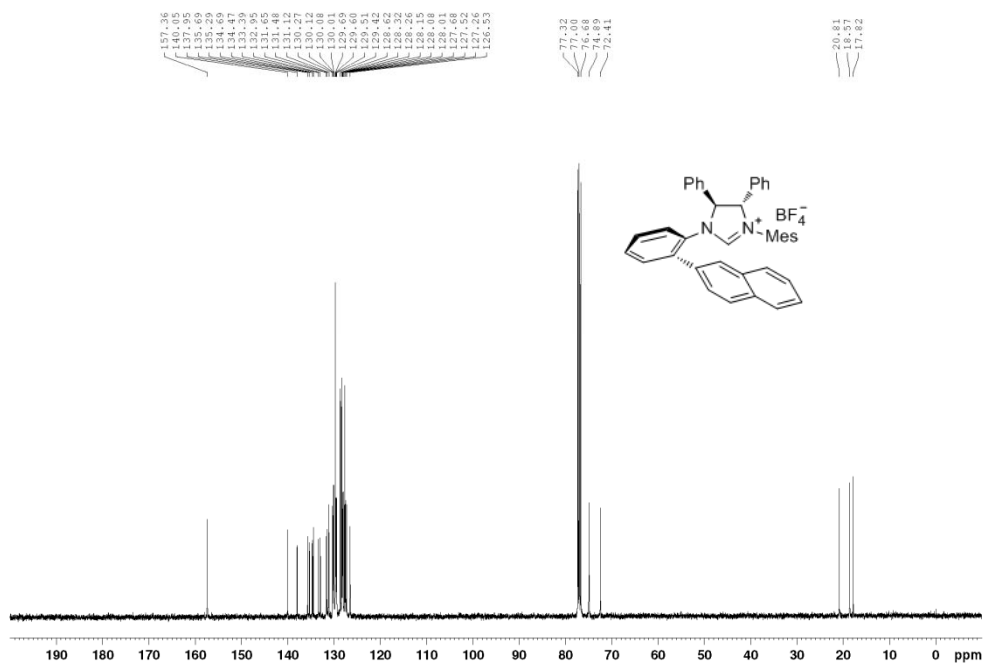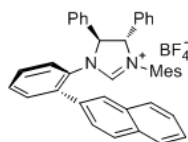

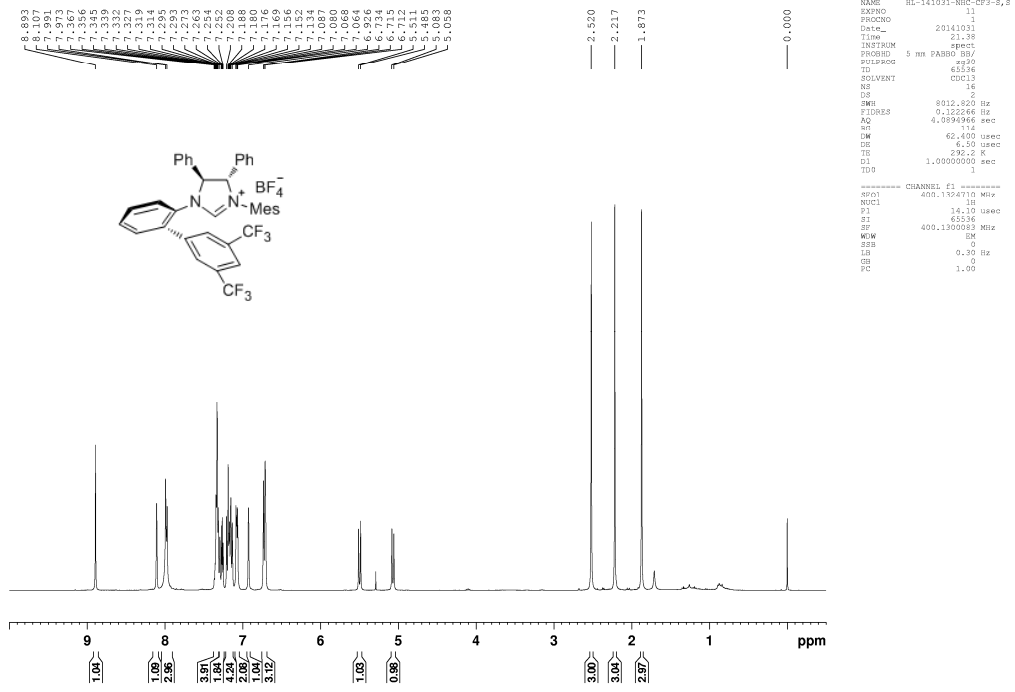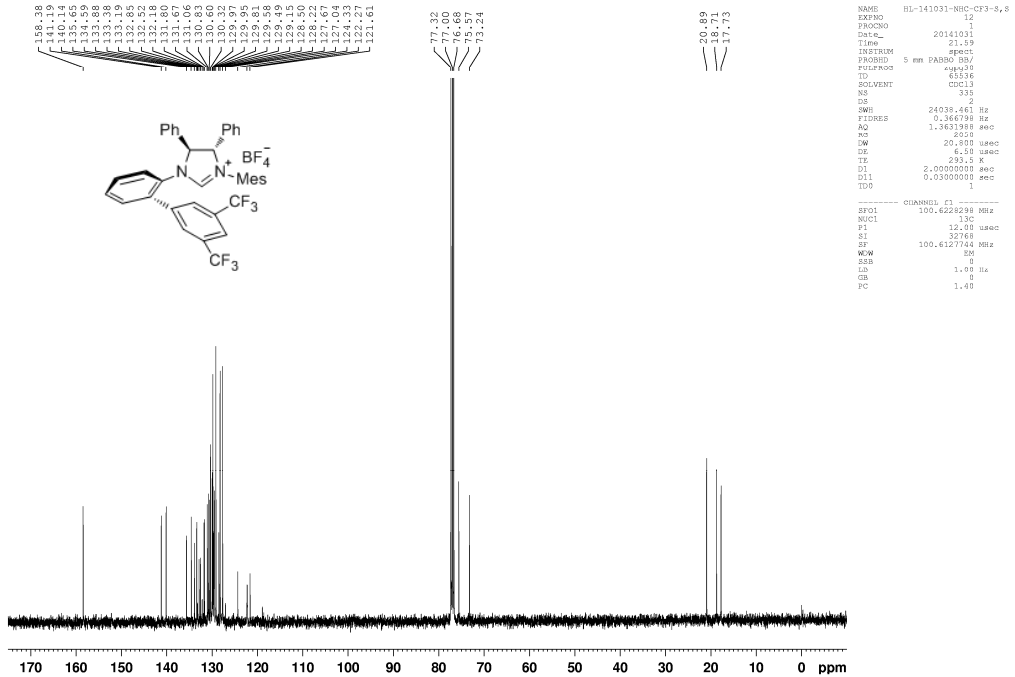

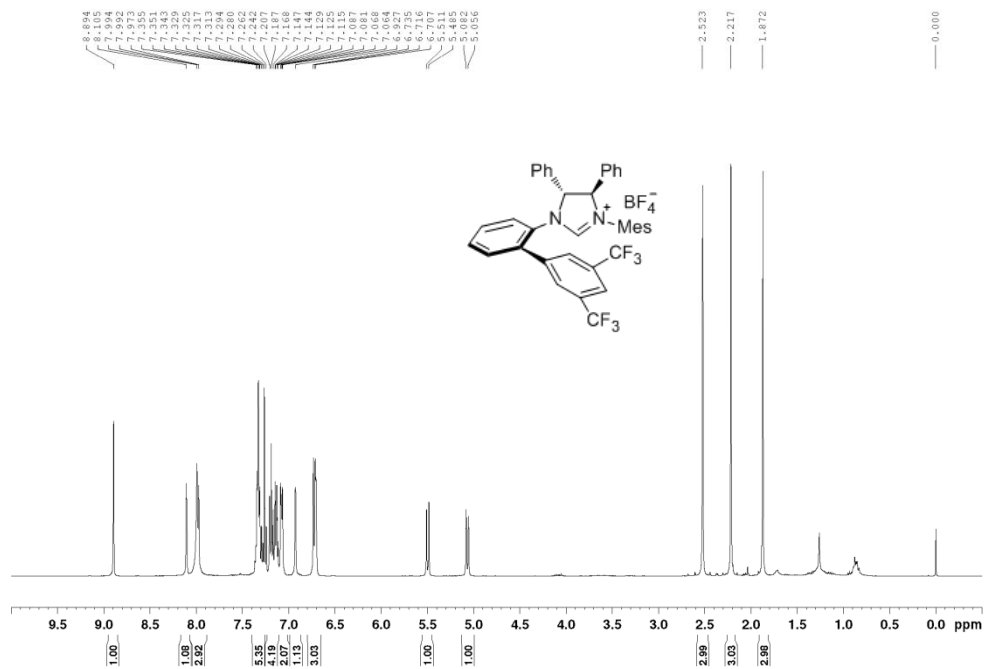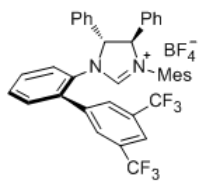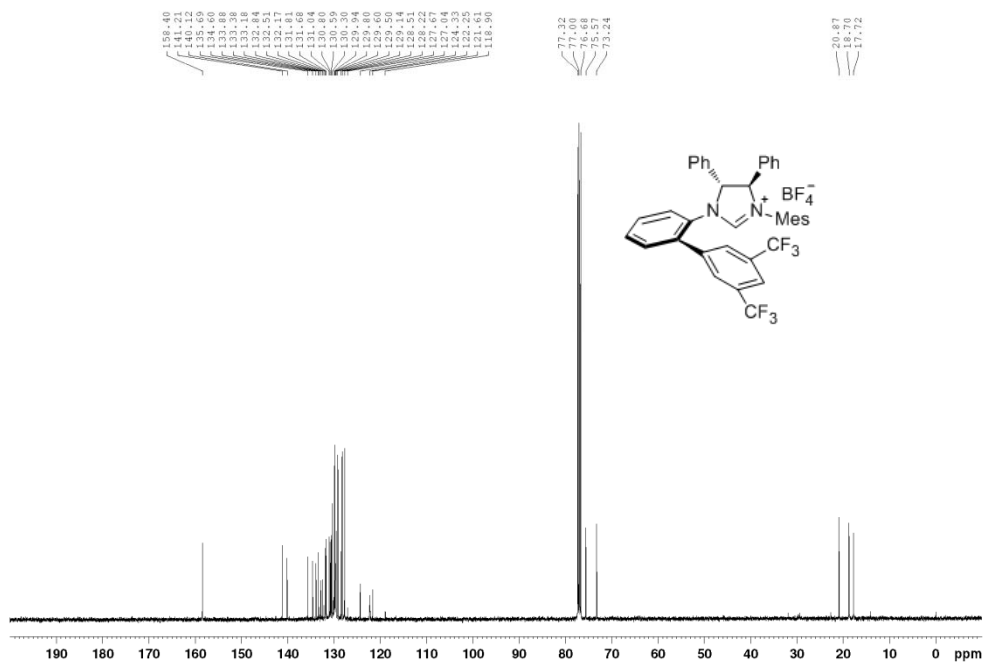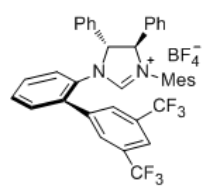

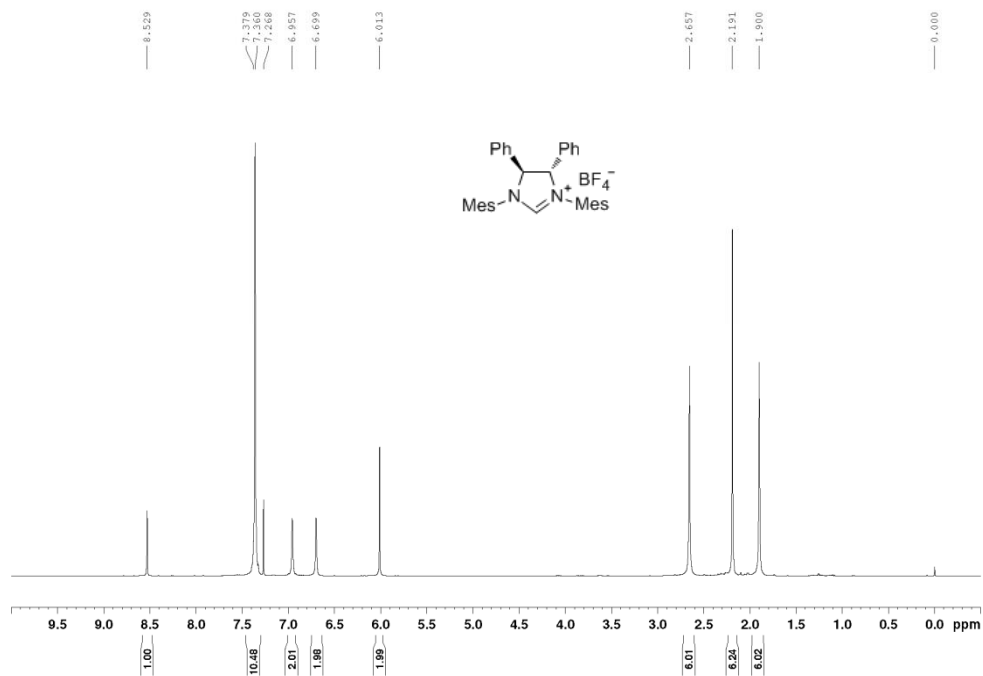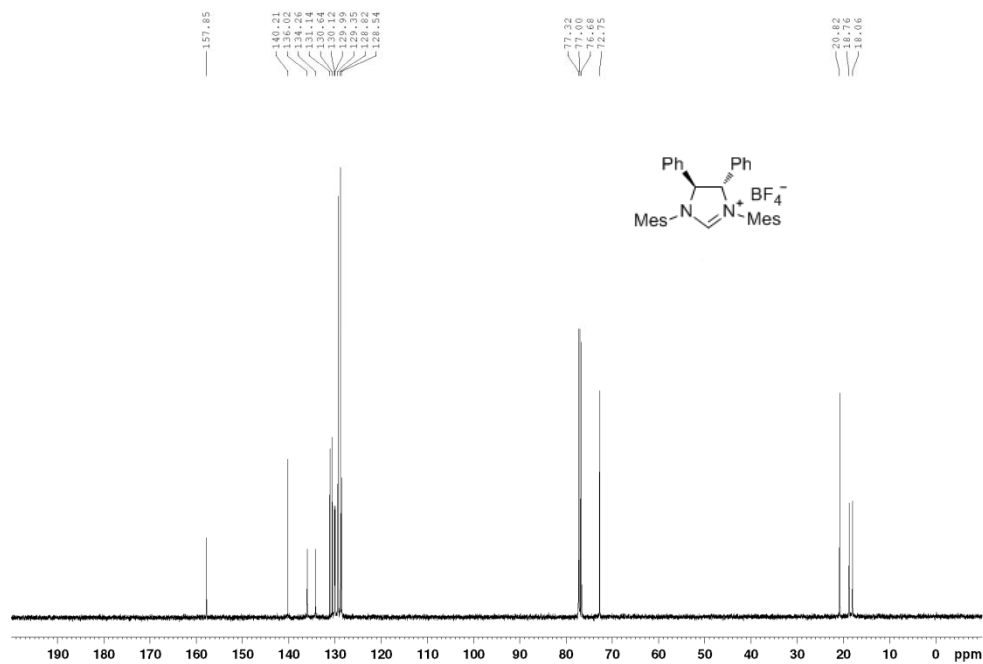



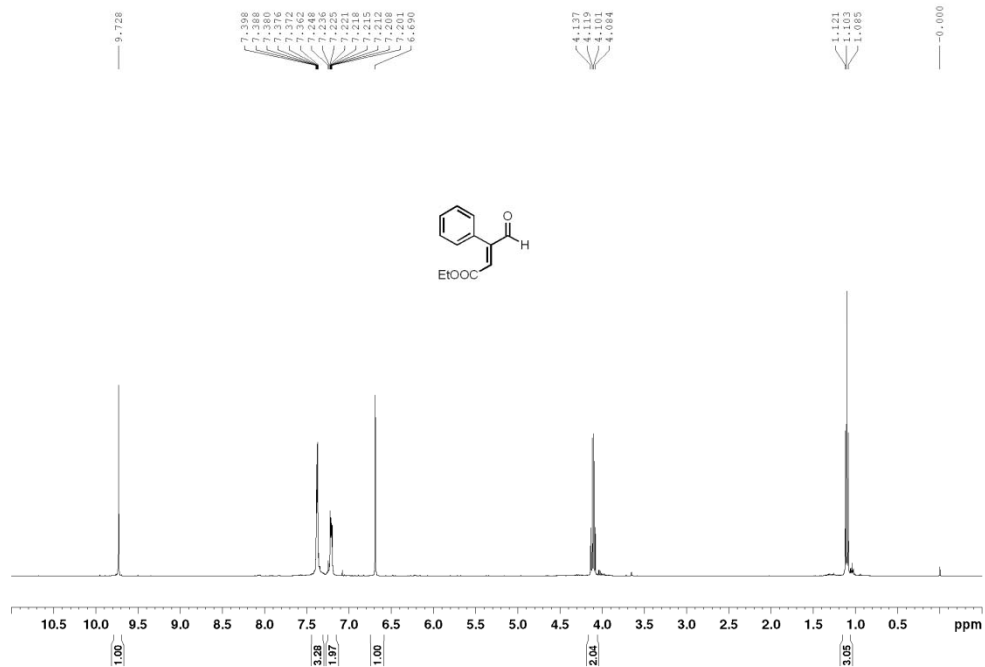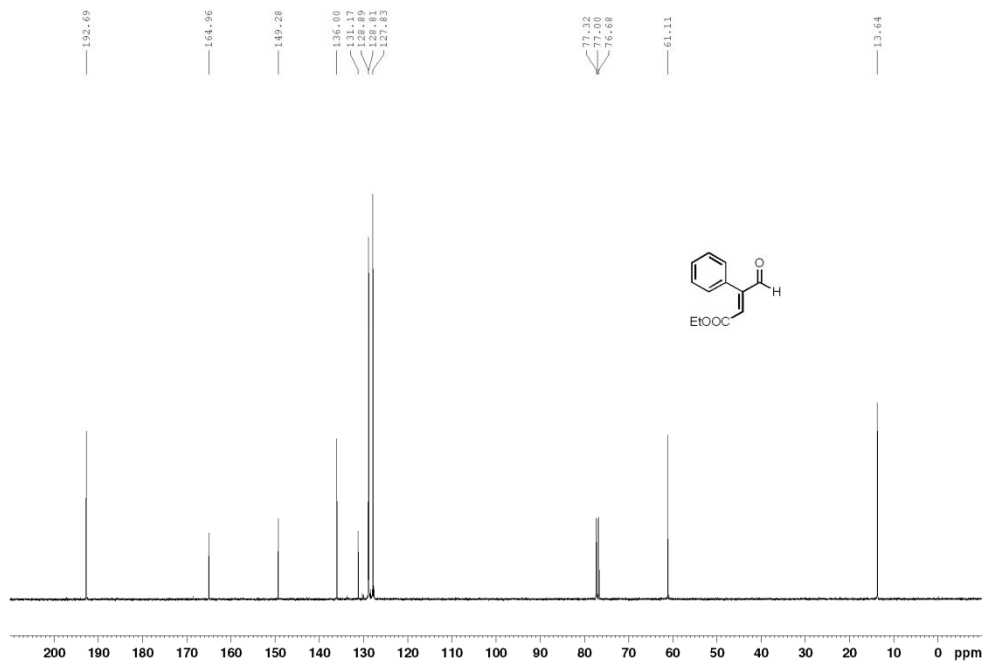

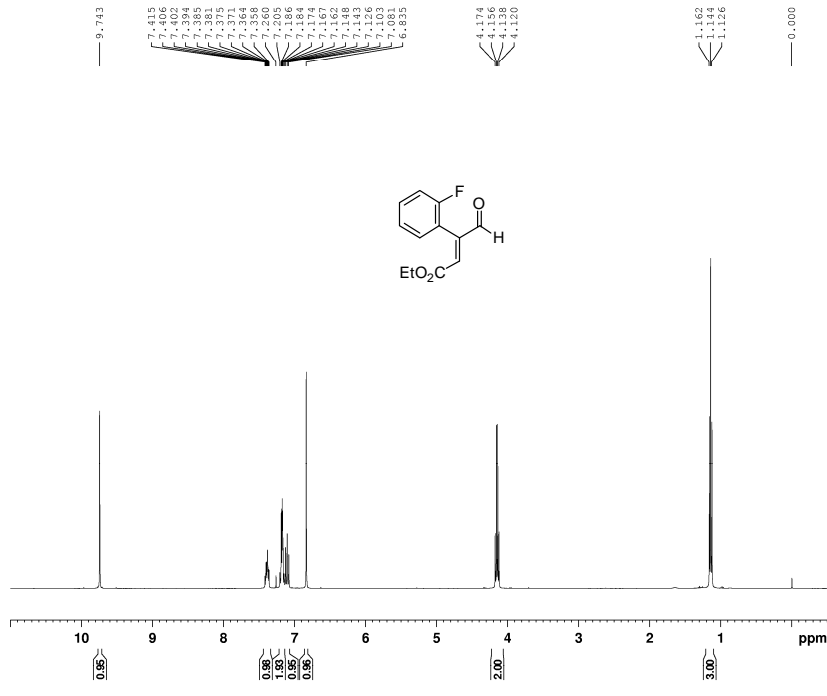

```

NAME HL-dlw-ph-2-F
EXPNO 1
PROCNO 1
Date_ 20140403
Time 12.27
INSTRUM spect
PROBHD 5 mm PABBO 1H/
PULPROG zg30
TD 65536
SOLVENT CDCl3
NS 16
DS 2
SWH 8012.820 Hz
FIDRES 0.122686 Hz
AQ 4.089266 sec
RG 801.6
DM 62.400 usec
DE 6.50 usec
TE 292.8 K
D1 1.0000000 sec
TD0 1
----- CHANNEL f1 -----
SFO1 400.1324710 MHz
NUC1 1H
P1 11.60 usec
PT 65536
SF 400.1300094 MHz
WNB EM
SSB 0
LB 0.30 Hz
GB 0
PC 1.00

```

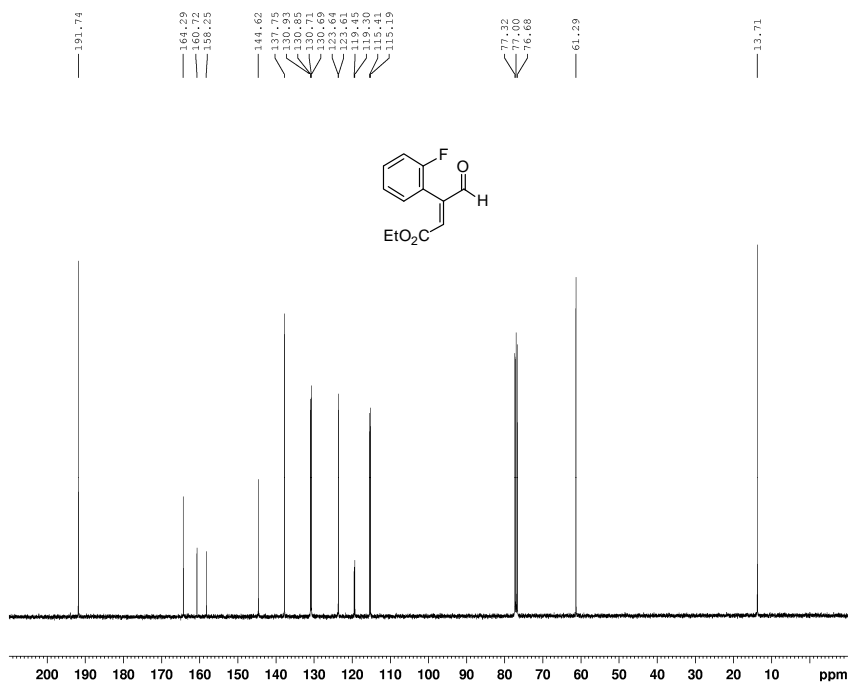

```

NAME HL-dlw-ph-2-F
EXPNO 1
PROCNO 1
Date_ 20140403
Time 12.21
INSTRUM spect
PROBHD 5 mm PABBO 1H/
PULPROG zg30
TD 65536
SOLVENT CDCl3
NS 400
DS 2
SWH 24039.461 Hz
FIDRES 0.366798 Hz
AQ 1.5631200 sec
RG 812
DM 20.800 usec
DE 6.50 usec
TE 294.0 K
D1 2.0000000 sec
D11 0.4300000 sec
TD0 1
----- CHANNEL f1 -----
SFO1 100.6228298 MHz
NUC1 13C
P1 14.45 usec
PT 32768
SF 100.6127780 MHz
WNB EM
SSB 0
LB 1.00 Hz
GB 0
PC 1.60

```

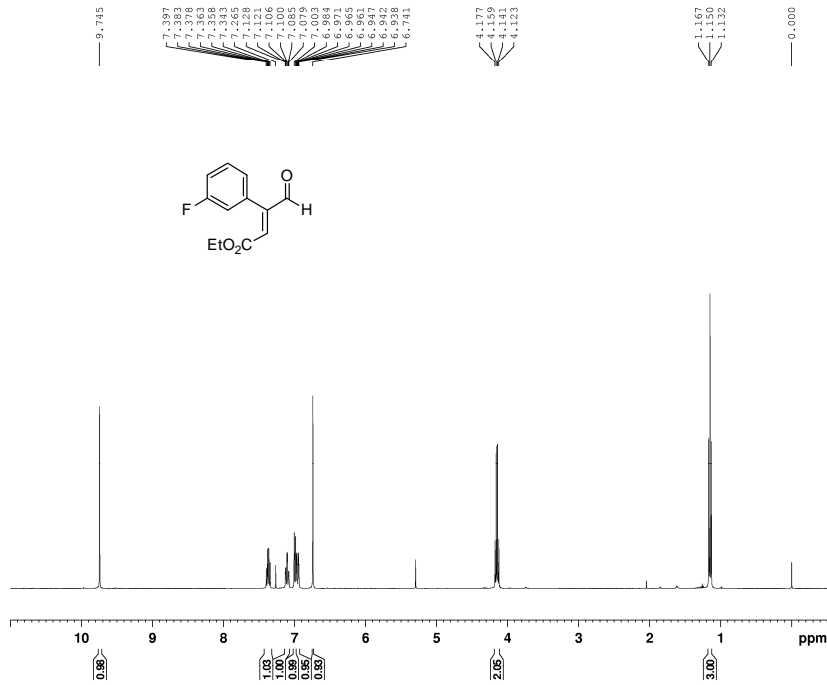

```

NAME      HL-4-d1w-3F-CBO
EXPNO    1
PROCNO   1
Date_    20141208
Time     11:39
INSTRUM  spect
PROBHD   5 mm PABBO 1H/
PULPROG  zg30
TD        65536
SOLVENT  CDCl3
NS        16
DS        2
SWH       8012.820 Hz
FIDRES   0.122686 Hz
AQ        4.089496e sec
RG        128
DM        62.400 usec
DE        6.50 usec
TE        289.4 K
D1        1.0000000 sec
TDD       1
===== CHANNEL f1 =====
SFO1     400.1324710 MHz
NUC1     1H
P1        11.60 usec
PT        65536
SF        400.1300081 MHz
WWM      RM
SSB       0
LB        0.30 Hz
GB        0
PC        1.00

```

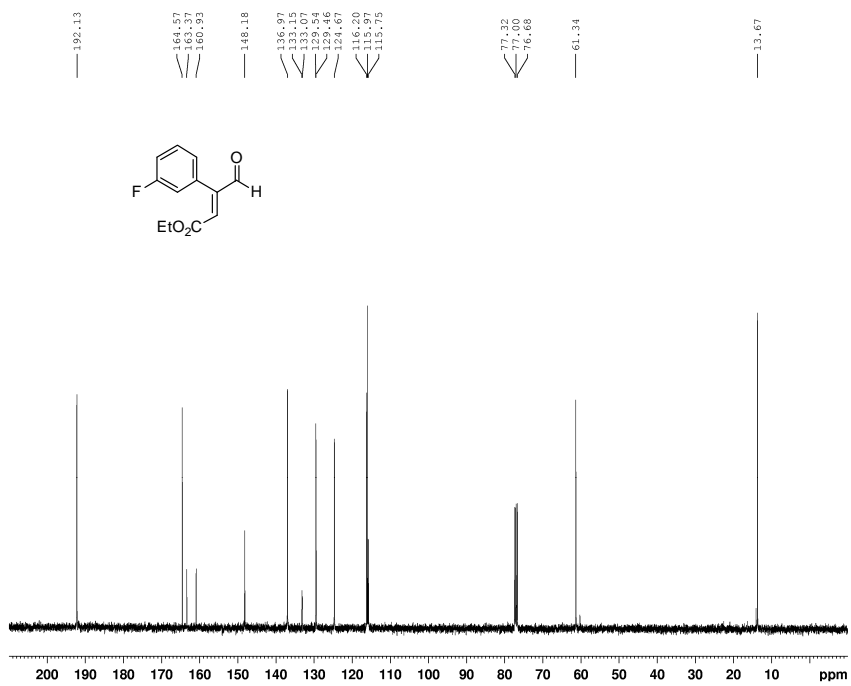

```

NAME      HL-4-d1w-3F
EXPNO    1
PROCNO   1
Date_    20141205
Time     21:47
INSTRUM  spect
PROBHD   5 mm PABBO 1H/
PULPROG  zgpg30
TD        65536
SOLVENT  CDCl3
NS        150
DS        2
SWH       24038.461 Hz
FIDRES   0.366796 Hz
AQ        1.3631988 sec
RG        675
DM        20.800 usec
DE        6.50 usec
TE        292.8 K
D1        2.0000000 sec
D11       0.0300000 sec
TDD       1
===== CHANNEL f1 =====
SFO1     100.6229298 MHz
NUC1     13C
P1        12.00 usec
PT        32768
SF        100.6127803 MHz
WWM      RM
SSB       0
LB        1.00 Hz
GB        0
PC        1.40

```

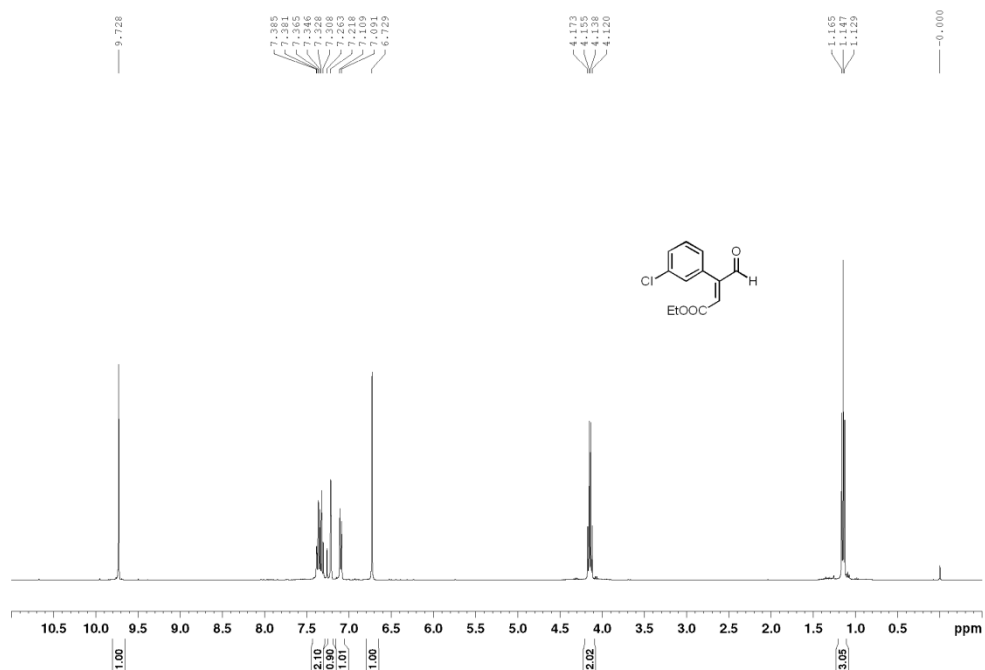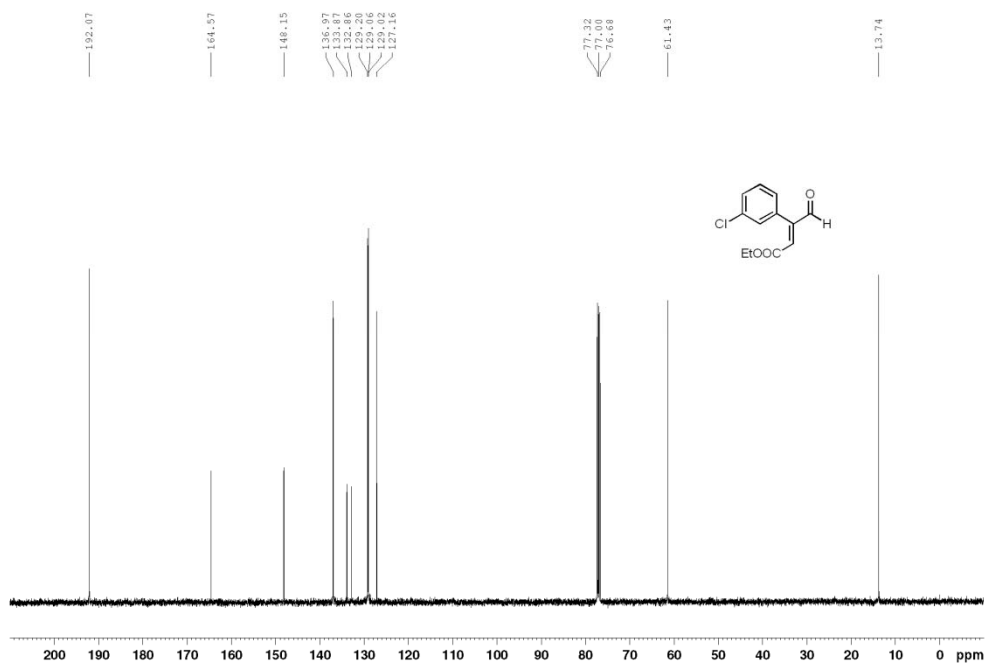

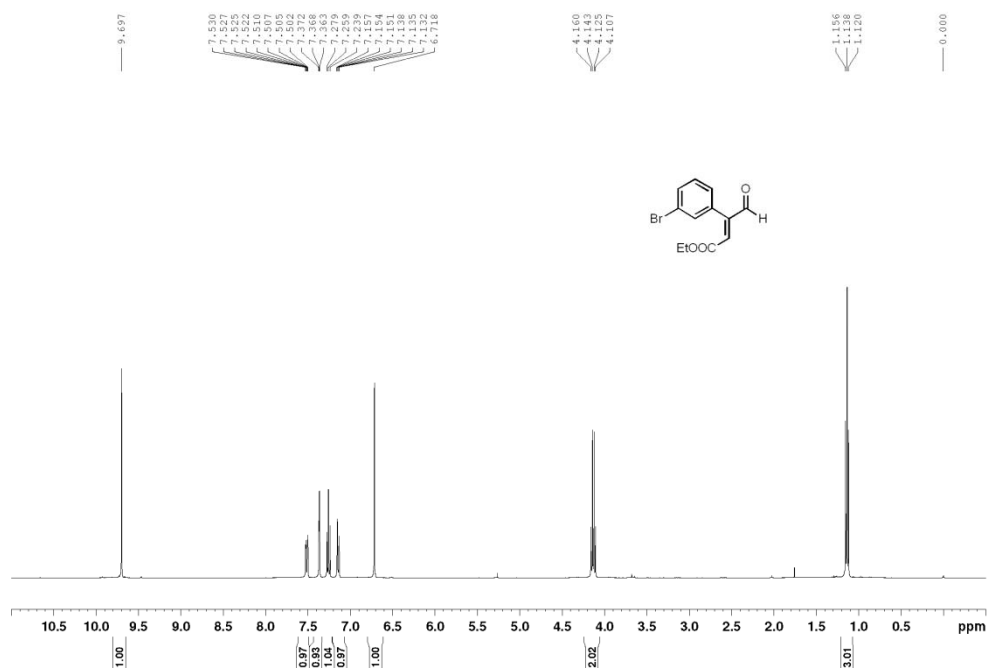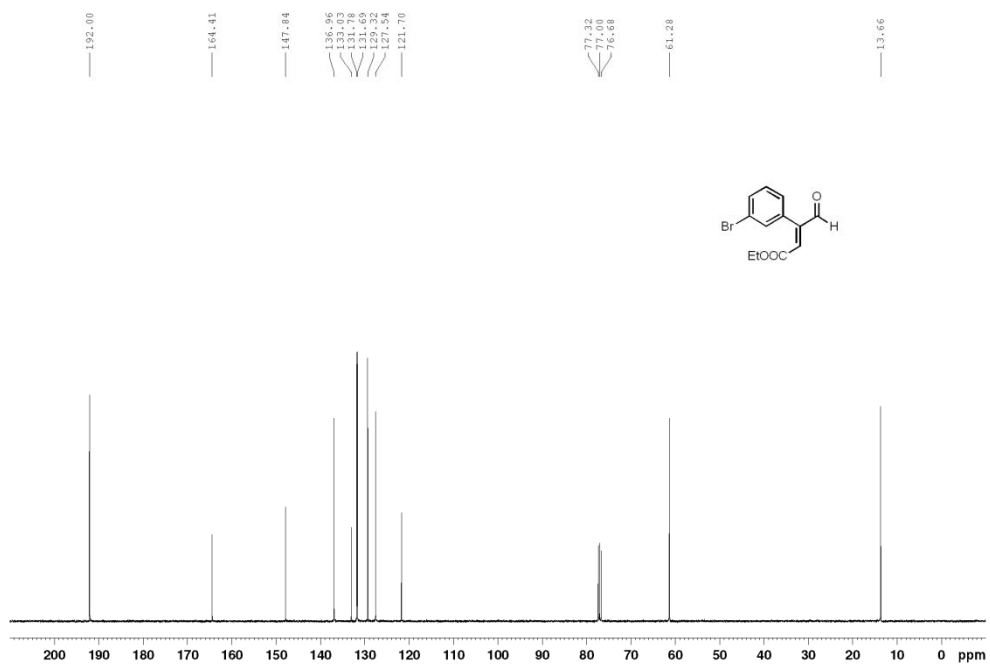

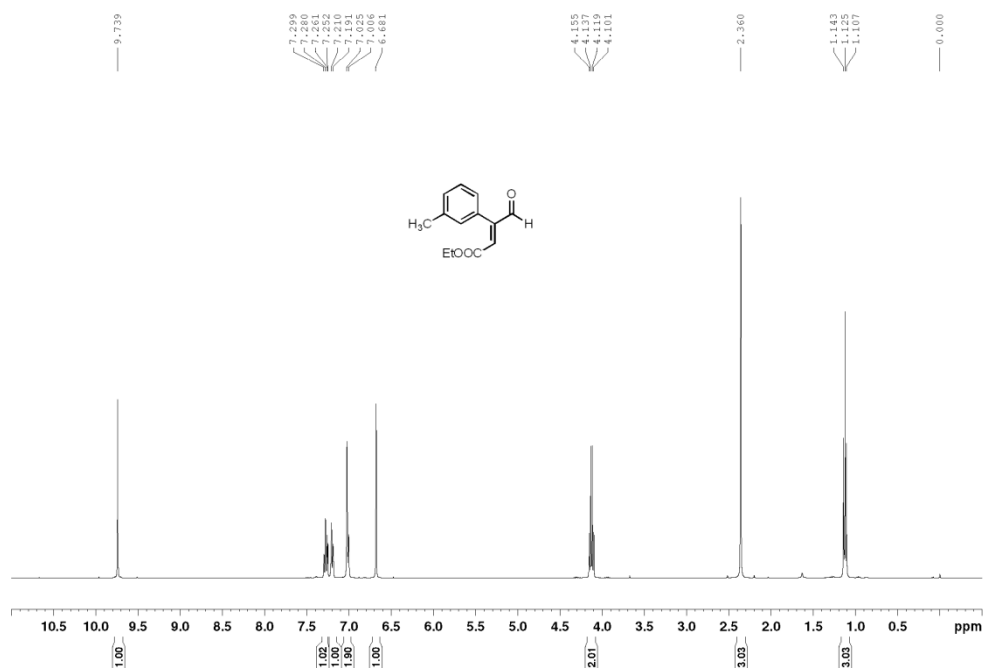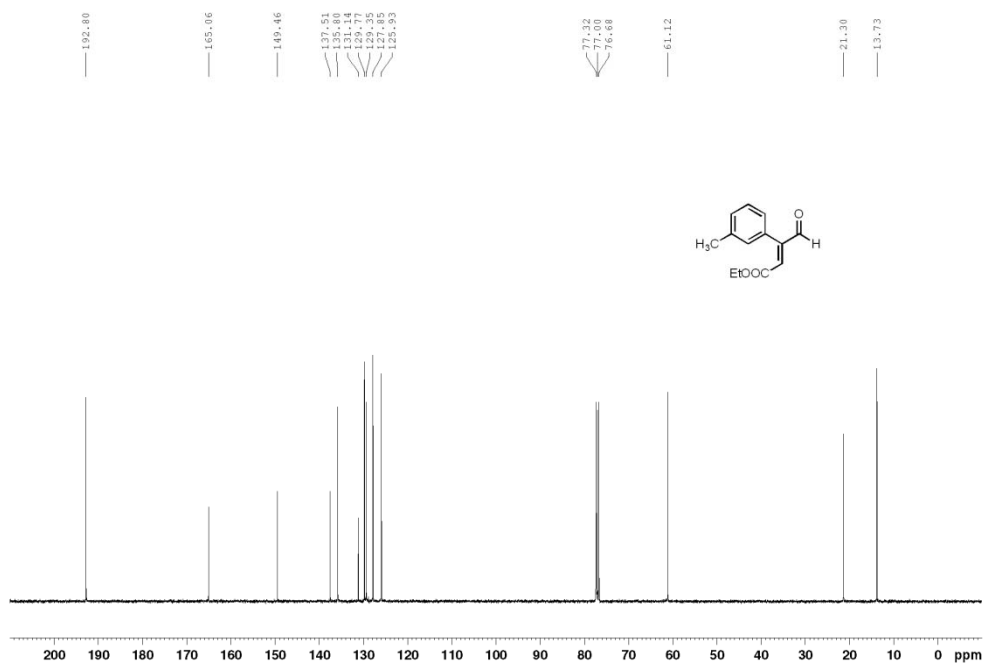

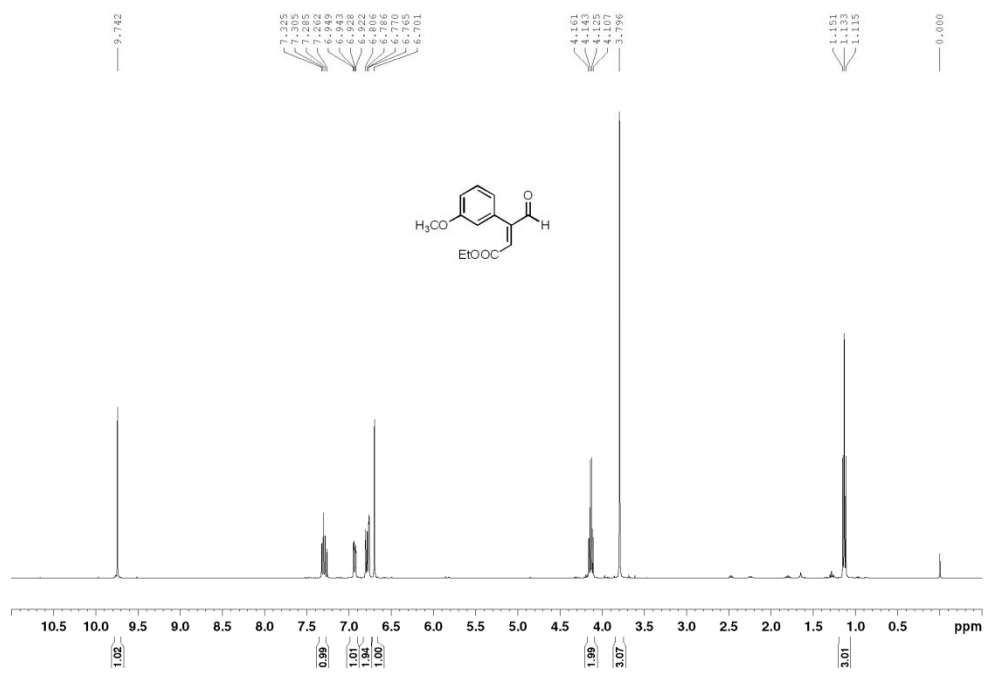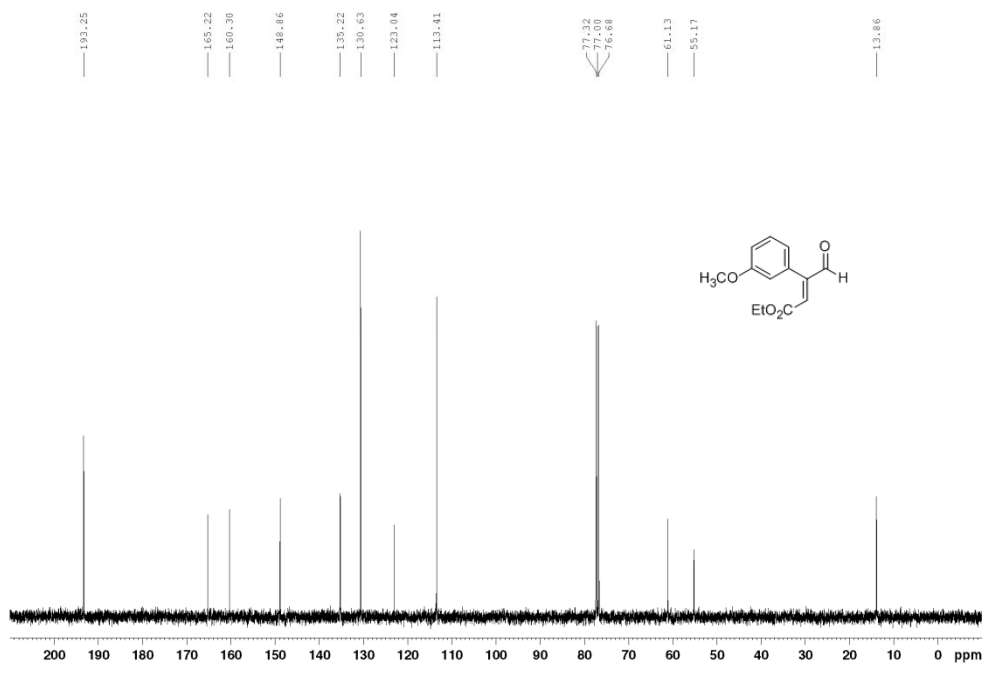

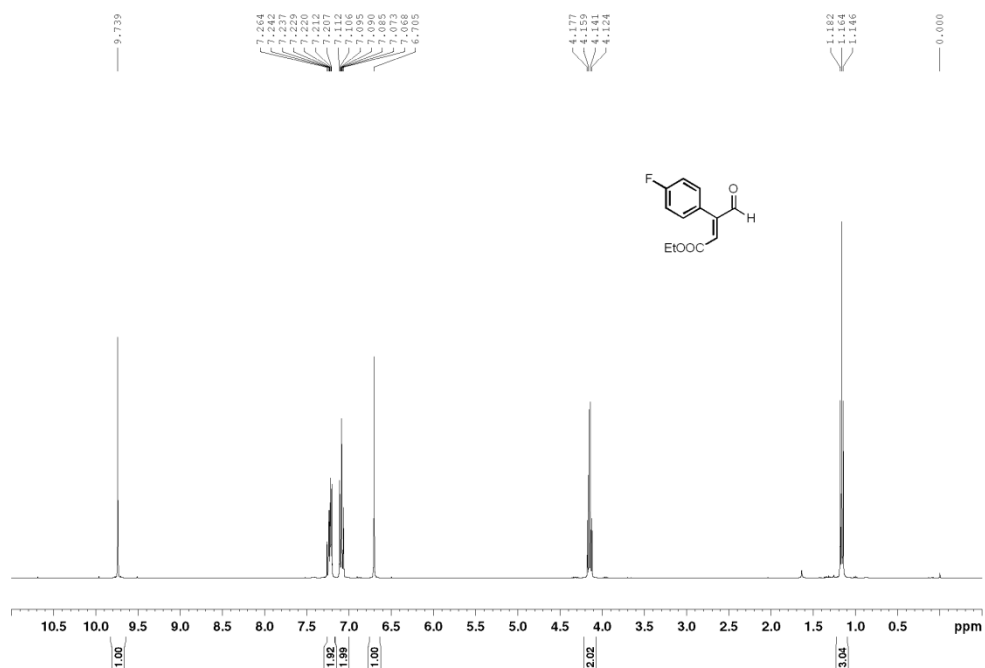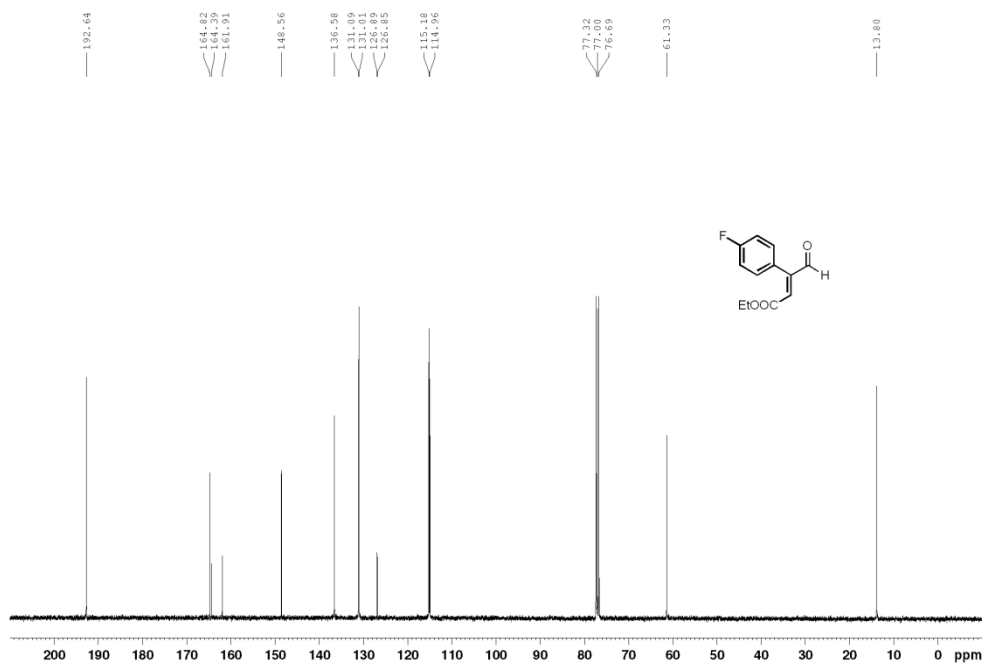



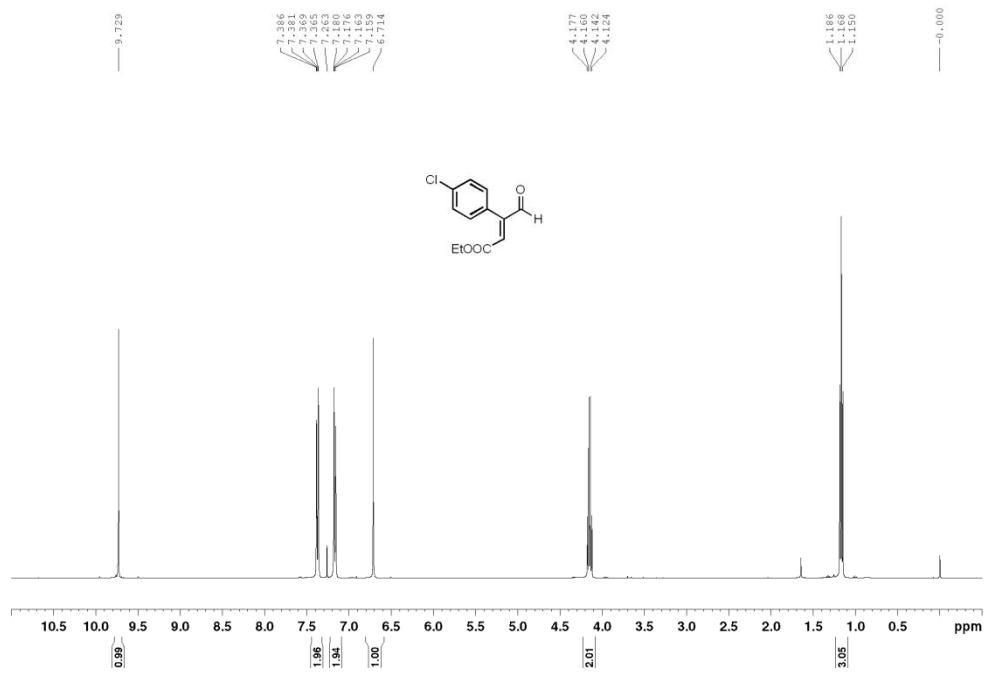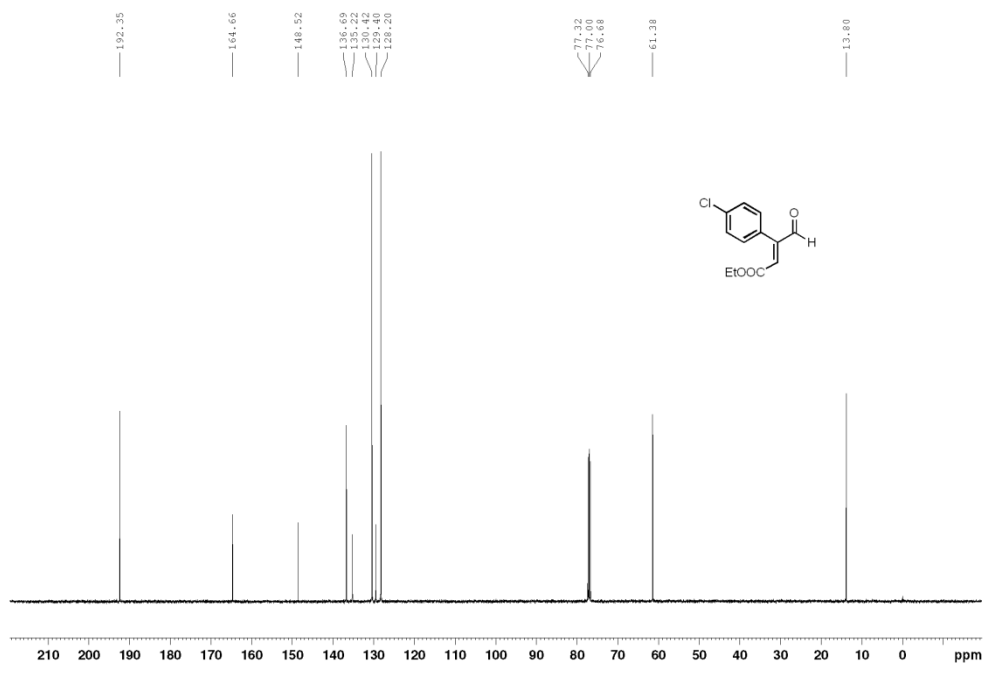

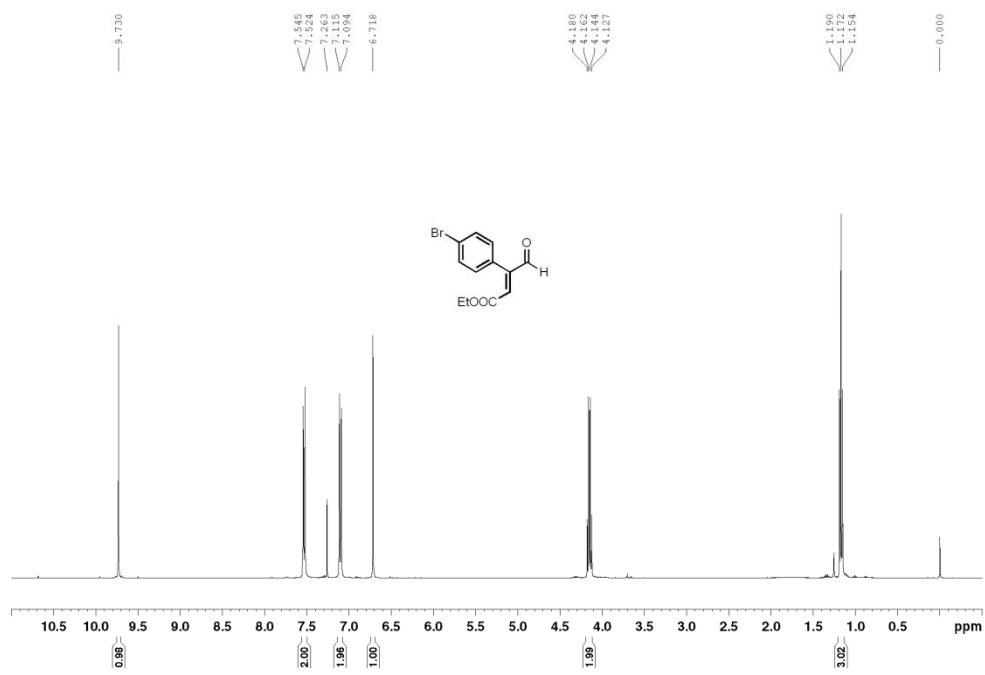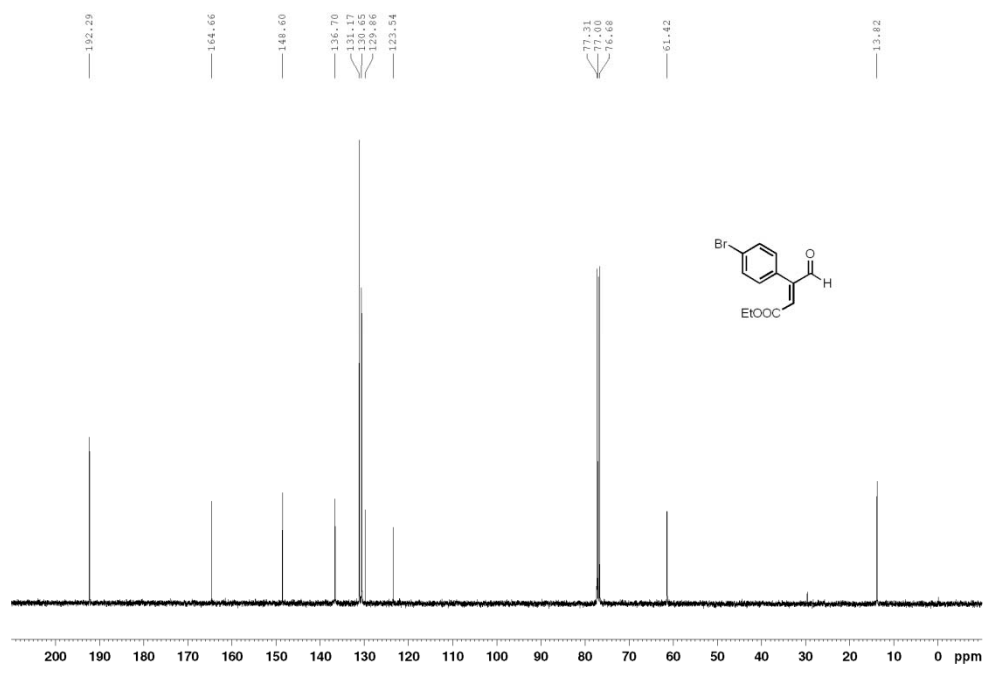

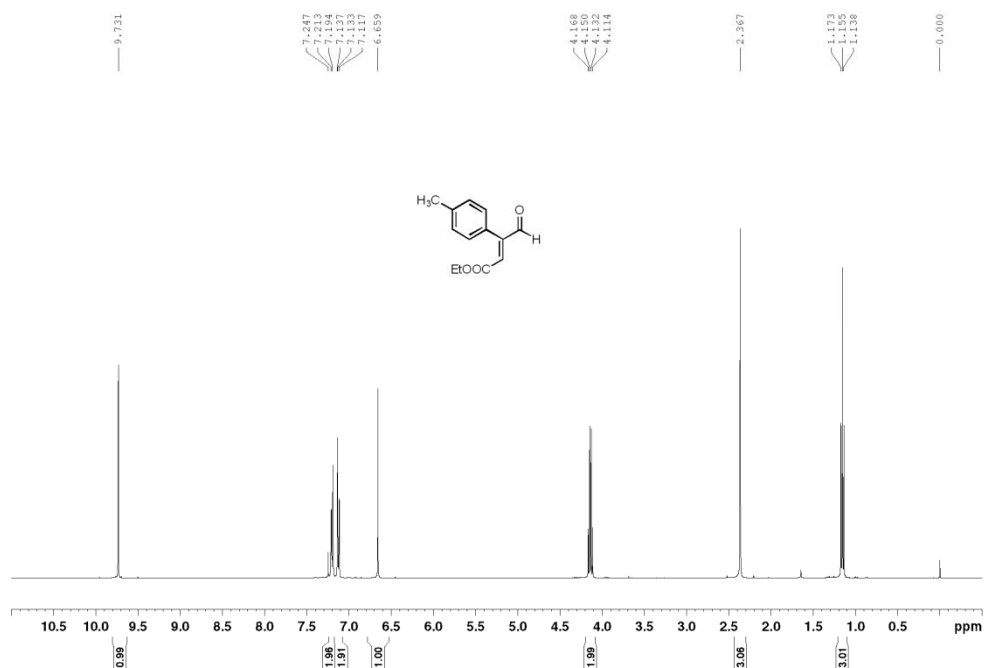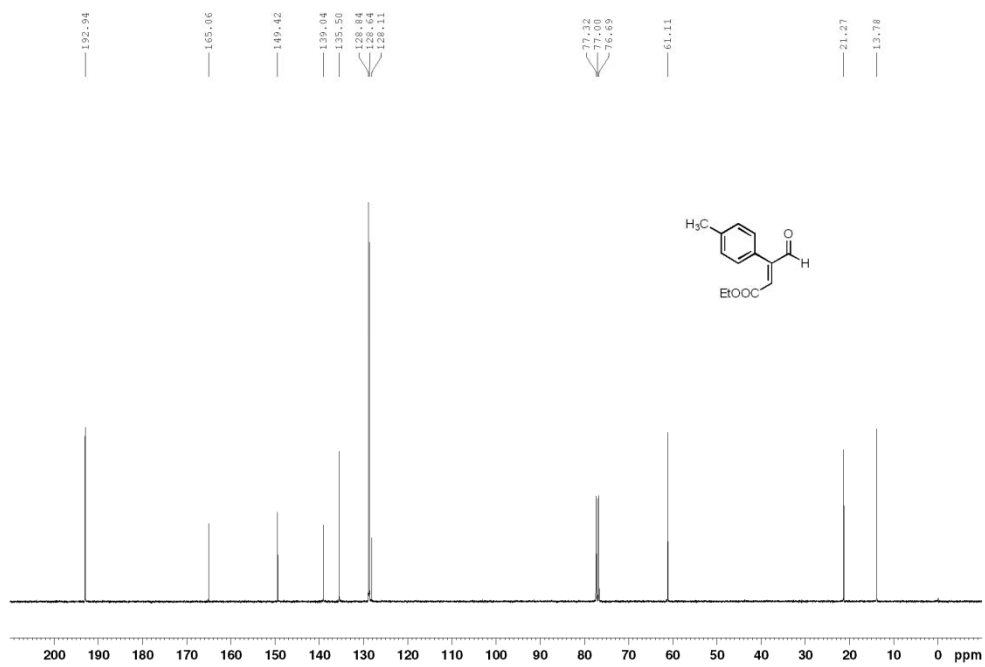

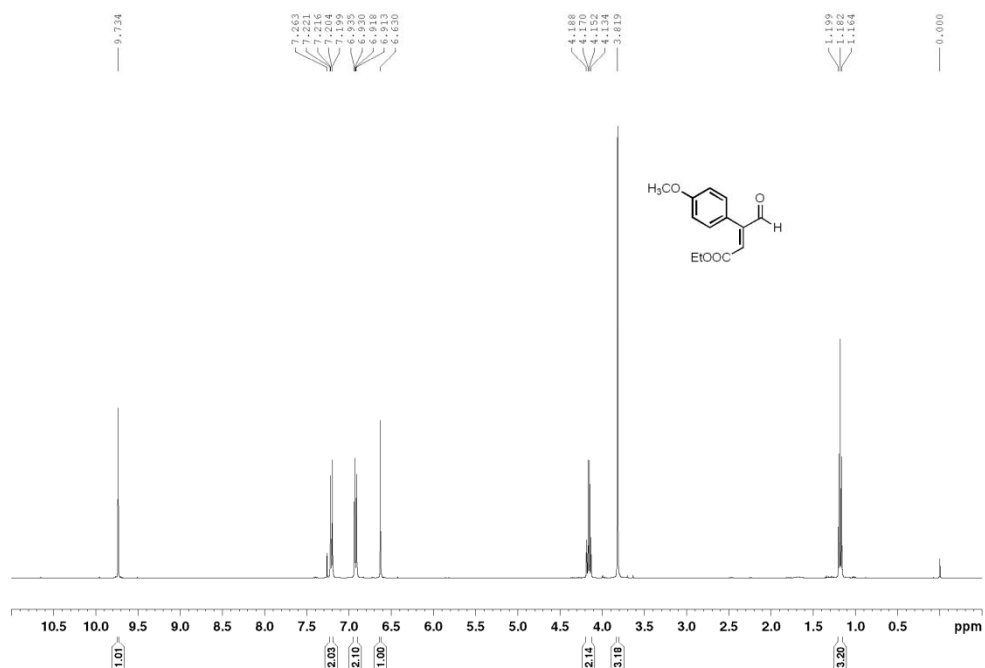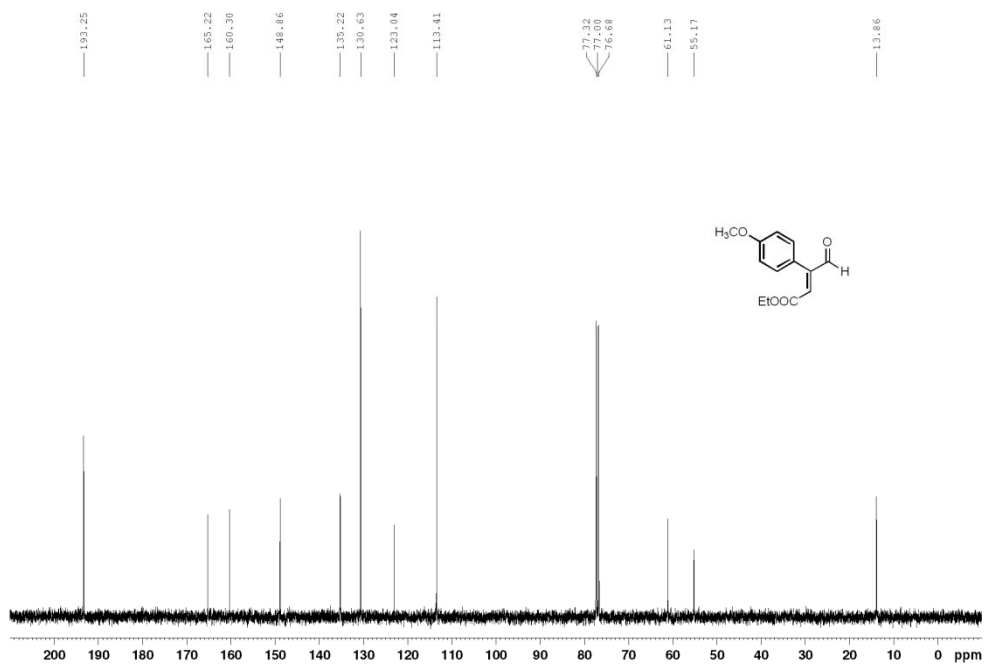

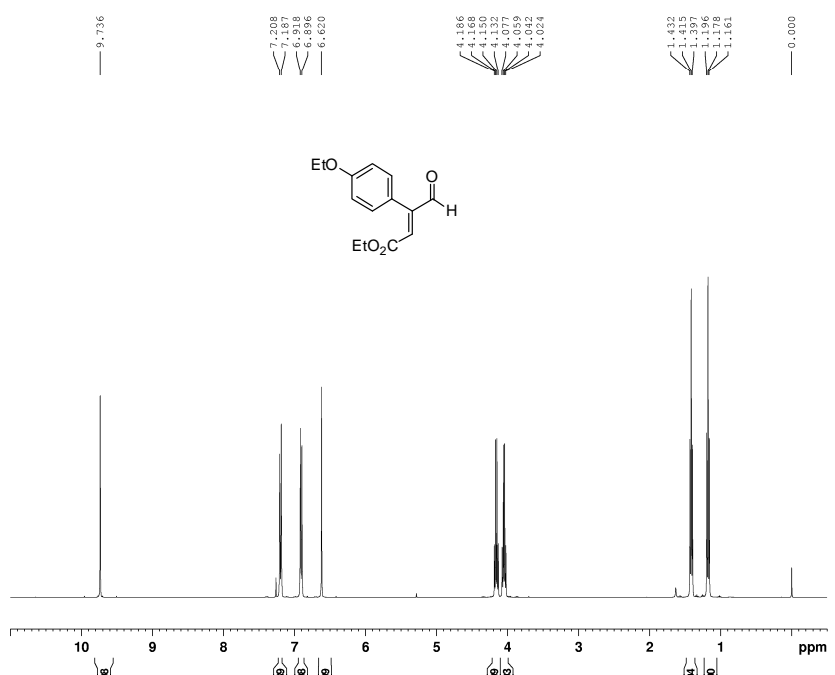

```

NAME HL-4-d1w-4-081
EXPNO 10
PROCNO 1
Date_ 20140604
Time 21.32
INSTRUM spect
PROBHD 5 mm PABBO BBO
PULPROG zg30
TD 65536
SOLVENT CDCl3
NS 2
DS 2
SWH 8012.820 Hz
F2RES 0.122268 Hz
AQ 4.0894966 sec
RG 90.5
DW 62.400 usec
DE 6.50 usec
TE 296.1 K
D1 1.0000000 sec
TDD 1
----- CHANNEL f1 -----
SFO1 400.1324710 MHz
NUC1 1H
P1 14.10 usec
SI 65536
SF 400.1300093 MHz
WDM 0
LB 0.30 Hz
GB 0
PC 1.00

```

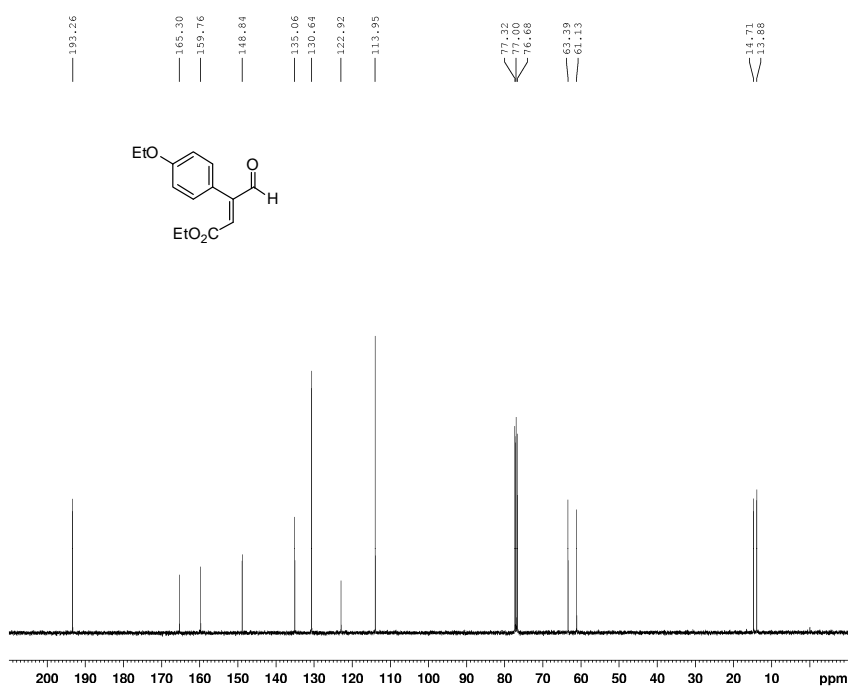

```

NAME HL-4-d1w-4-081
EXPNO 11
PROCNO 1
Date_ 20140604
Time 22.05
INSTRUM spect
PROBHD 5 mm PABBO BBO
PULPROG zgpg30
TD 65536
SOLVENT CDCl3
NS 200
DS 2
SWH 24038.461 Hz
F2RES 0.366798 Hz
AQ 1.5631988 sec
RG 924
DW 20.600 usec
DE 6.50 usec
TE 297.2 K
D1 2.0000000 sec
D11 0.3300000 sec
TDD 1
----- CHANNEL f1 -----
SFO1 100.6228298 MHz
NUC1 13C
P1 12.00 usec
SI 32768
SF 100.6127751 MHz
WDM 0
SSB 0
LB 1.00 Hz
GB 0
PC 1.40

```

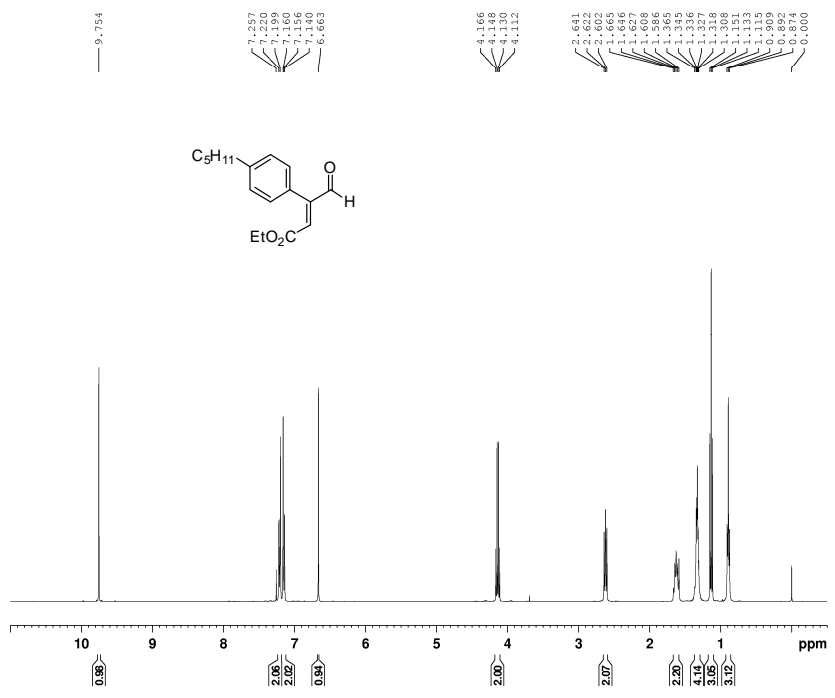

```

NAME HL-4-d1w-4-amyl
EXPNO 1
PROCNO 1
Date_ 20140708
Time 21.24
INSTRUM spect
PROBHD 5 mm PABBO 1H/
PULPROG zg30
TD 65536
SOLVENT CDCl3
NS 16
DS 2
SWH 8012.820 Hz
F2RES 0.122266 Hz
AQ 4.0894966 sec
RG 101
DW 62.400 usec
DE 6.50 usec
TE 296.0 K
D1 1.0000000 sec
TDD 1
===== CHANNEL f1 =====
SFO1 400.1324710 MHz
NUC1 1H
P1 14.10 usec
PT 65536
SF 400.1300107 MHz
WWM RM
SSB 0
LB 0.30 Hz
GB 0
PC 1.00

```

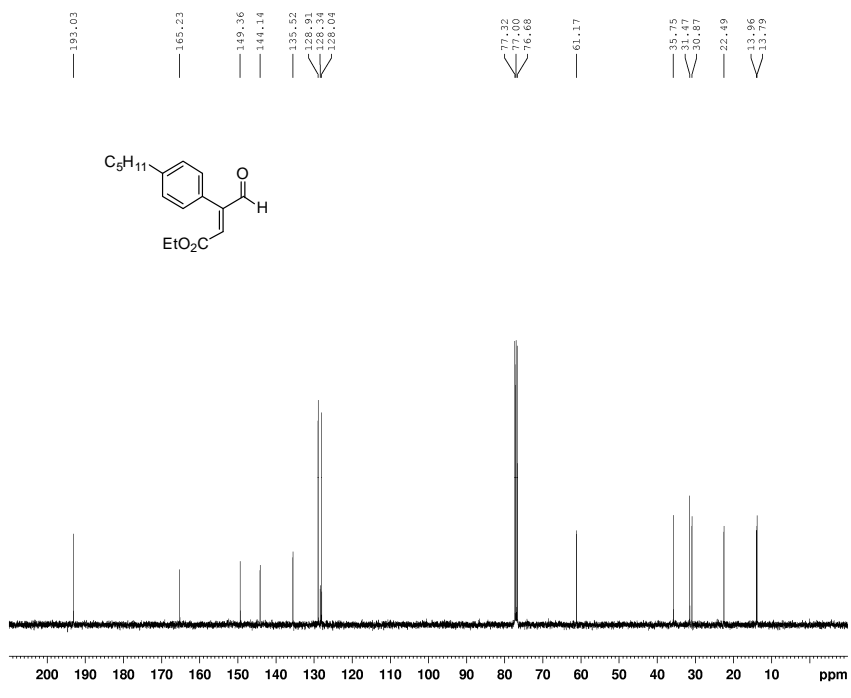

```

NAME HL-4-d1w-4-amyl
EXPNO 1
PROCNO 1
Date_ 20140708
Time 21.49
INSTRUM spect
PROBHD 5 mm PABBO 1H/
PULPROG zgpg30
TD 65536
SOLVENT CDCl3
NS 85
DS 2
SWH 24038.461 Hz
F2RES 0.346796 Hz
AQ 1.3631988 sec
RG 1030
DW 20.800 usec
DE 6.50 usec
TE 297.0 K
D1 2.0000000 sec
D11 0.0300000 sec
TDD 1
===== CHANNEL f1 =====
SFO1 100.6229298 MHz
NUC1 13C
P1 12.00 usec
PT 32768
SF 100.6127729 MHz
WWM RM
SSB 0
LB 1.00 Hz
GB 0
PC 1.40

```

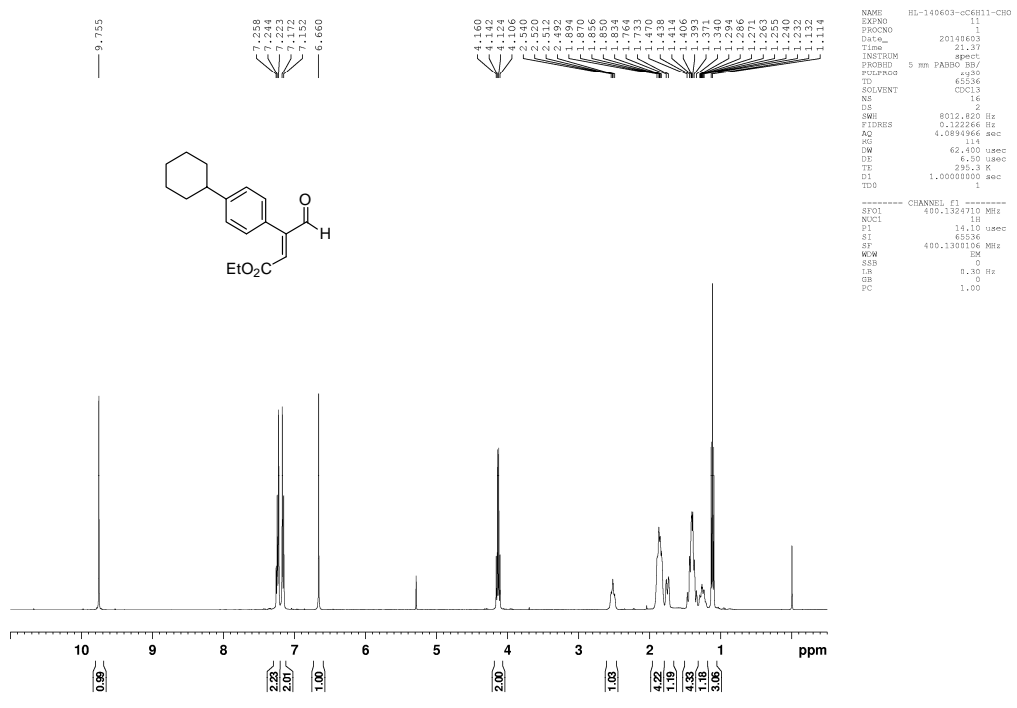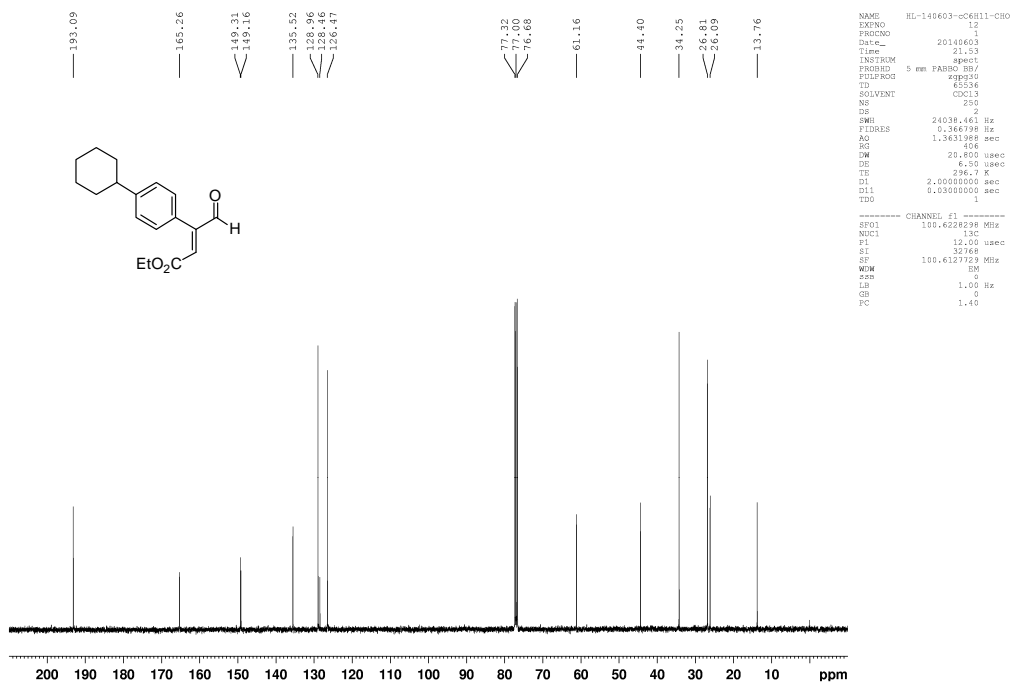

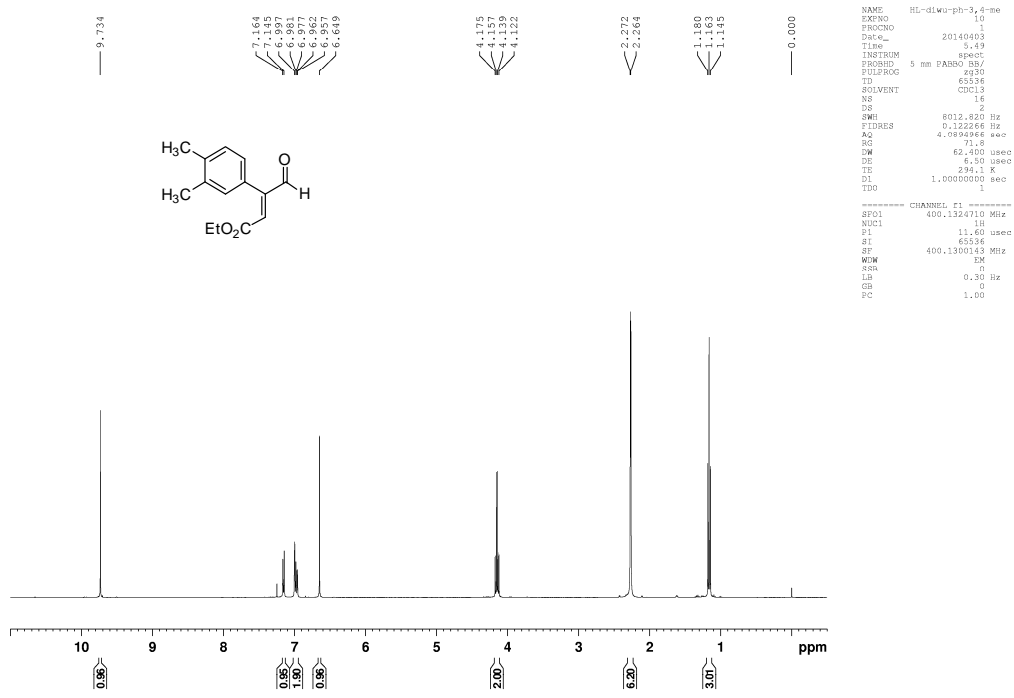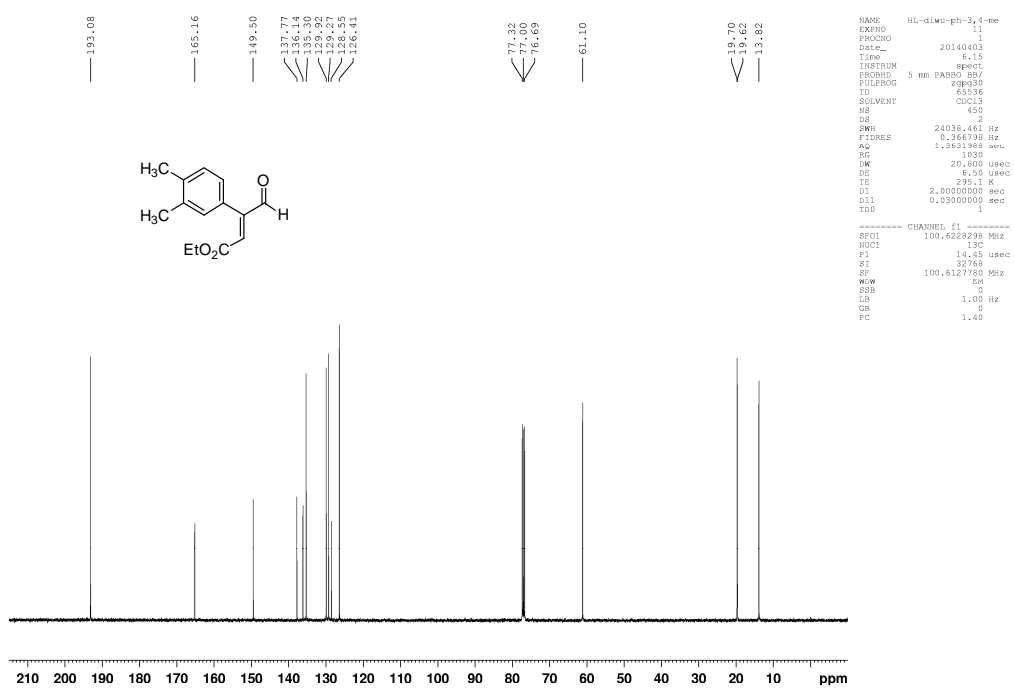



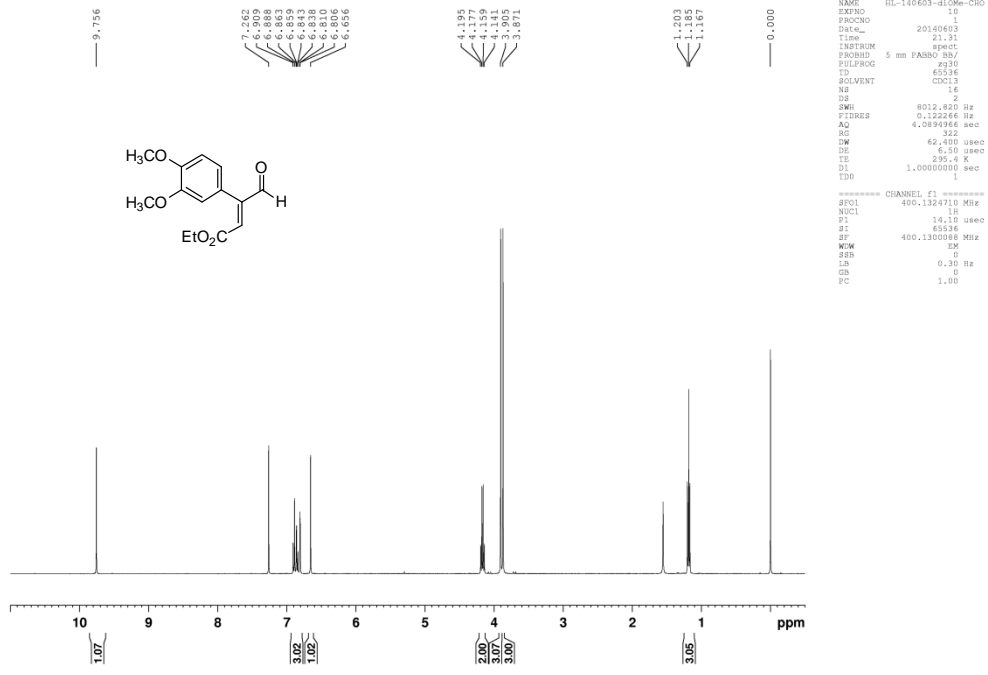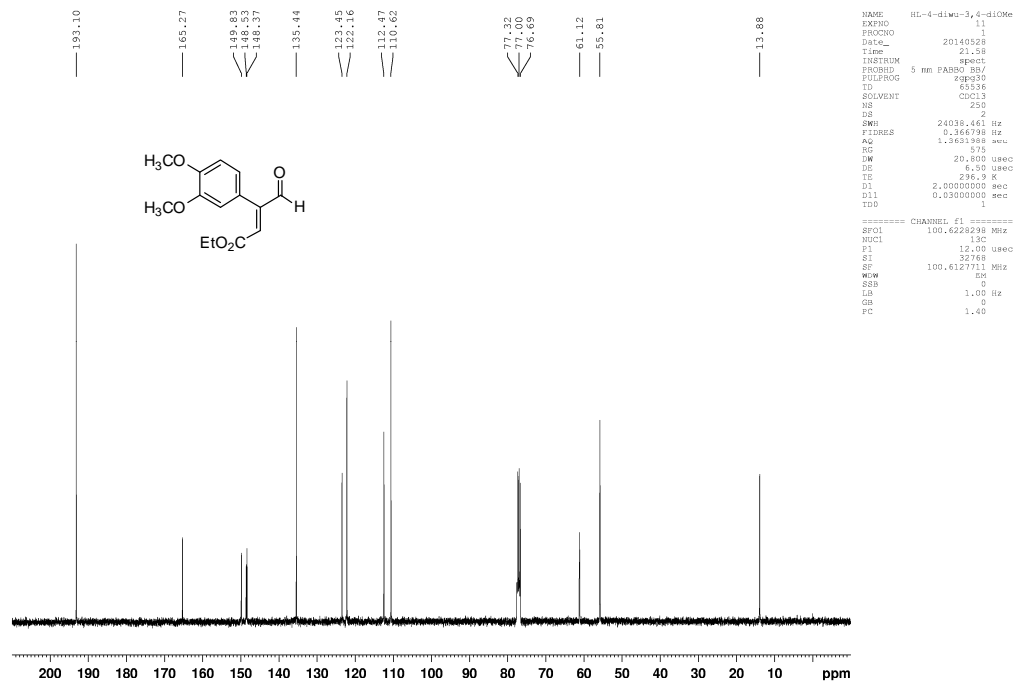

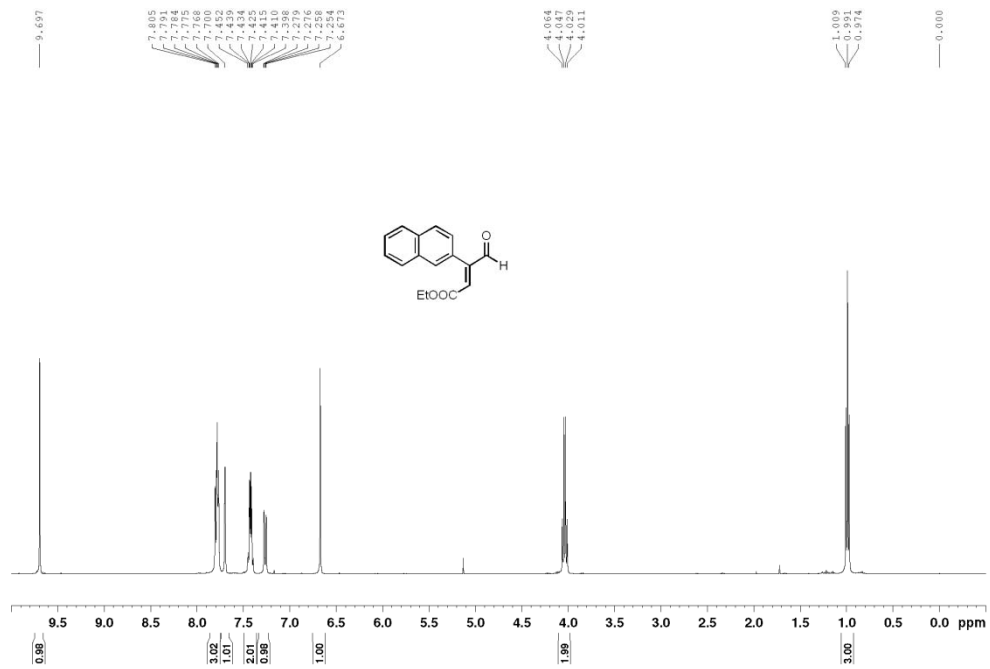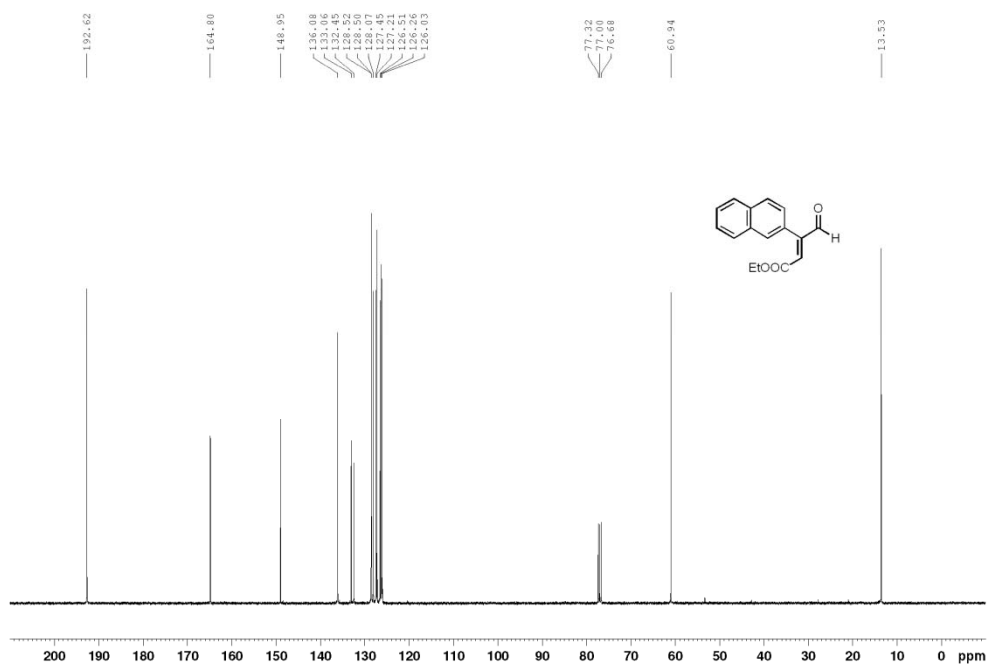

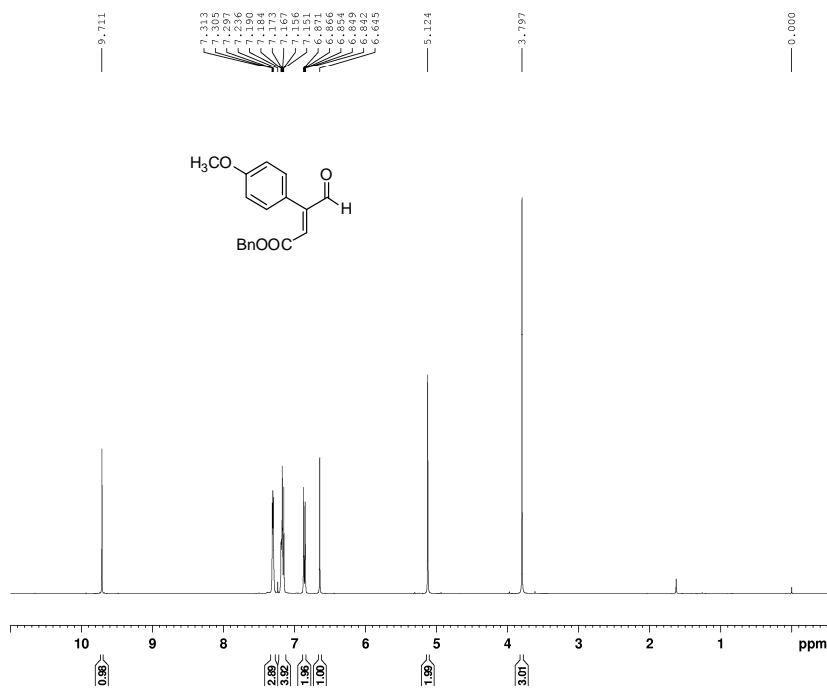

```

NAME HI-4-dim-40Me-COObn
EXPNO 1
PROCNO 1
Date_ 20111028
Time 21:36
INSTRUM spect
PROBHD 5 mm PABBO BB/
PULPROG zgpg30
TD 65536
SOLVENT CDCl3
NS 16
DS 2
SWH 8012.600 Hz
FIDRES 0.122266 Hz
AQ 4.084966 sec
RG 65.4
DW 62.400 usec
DE 6.50 usec
TE 294.2 K
D1 1.0000000 sec
TD0 1
  
```

```

----- CHANNEL f1 -----
SF01 400.132410 MHz
NUC1 1H
P1 14.10 usec
SI 65536
WFWD 400.1300192 MHz
SSB 0
LB 0
GB 0
PC 1.00
  
```

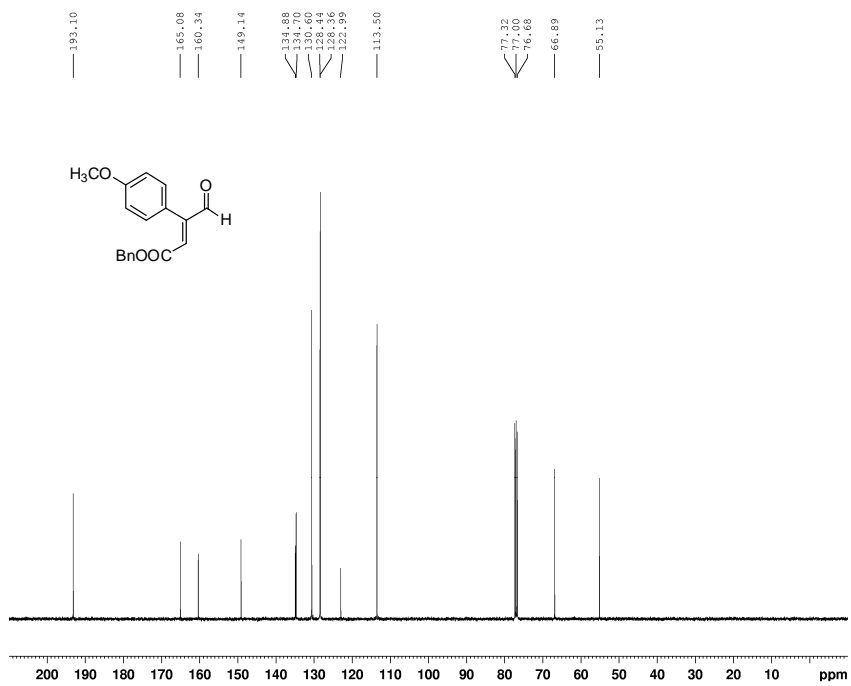

```

NAME HI-4-dim-40Me-COObn
EXPNO 1
PROCNO 1
Date_ 20111028
Time 21:49
INSTRUM spect
PROBHD 5 mm PABBO BB/
PULPROG zgpg30
TD 65536
SOLVENT CDCl3
NS 200
DS 2
SWH 24038.461 Hz
FIDRES 0.366398 Hz
AQ 1.3631988 sec
RG 1030
DW 20.800 usec
DE 6.50 usec
TE 295.5 K
D1 2.0000000 sec
D11 0.0300000 sec
TD0 1
  
```

```

----- CHANNEL f1 -----
SF01 100.628298 MHz
NUC1 13C
P1 12.00 usec
SI 32768
SF 100.6127802 MHz
WDM 0
SSB 0
LB 1.00 Hz
GB 0
PC 1.40
  
```

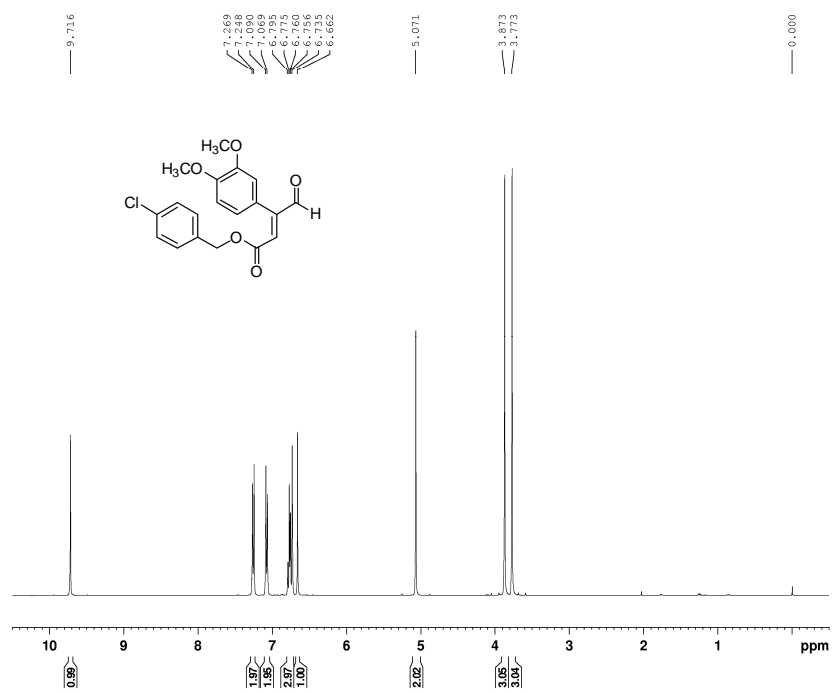

```

NAME      HI-4-d1w-3,4d10Me-cl
EXPNO    1
PROCNO   1
Date_    20141205
Time     21.54
INSTRUM  spect
PROBHD   5 mm PABBO QNP
PULPROG  zgpg30
TD        65536
SOLVENT  CDCl3
NS        14
DS        2
SWH       8012.820 Hz
FIDRES   0.122496 Hz
AQ        4.08496E-05 sec
RG         320
DE        6.400 usec
TE        291.2 K
D1        1.80000000 sec
D11       0
D12       0
D13       0
D14       0
D15       0
D16       0
D17       0
D18       0
D19       0
D20       0
  
```

```

----- CHANNEL f1 -----
NUC1      13C
NUC2      13C
PC        1.00
  
```

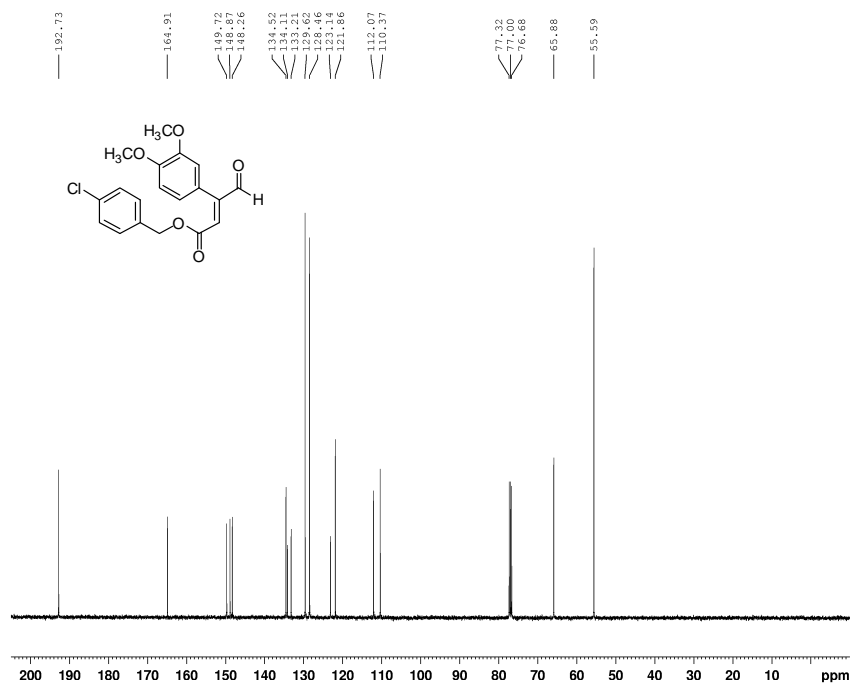

```

NAME      HI-4-d1w-3,4d10Me-cl
EXPNO    11
PROCNO   1
Date_    20141205
Time     22.04
INSTRUM  spect
PROBHD   5 mm PABBO QNP
PULPROG  zgpg30
TD        65536
SOLVENT  CDCl3
NS        150
DS        2
SWH       24039.462 Hz
FIDRES   0.366799 Hz
AQ        1.363398E-05 sec
RG         812
DE        20.800 usec
TE        4.50 usec
PC        1.40
D1        2.00000000 sec
D11       0
D12       0
D13       0
D14       0
D15       0
D16       0
D17       0
D18       0
D19       0
D20       0
  
```

```

----- CHANNEL f1 -----
NUC1      13C
NUC2      13C
PC        1.40
  
```

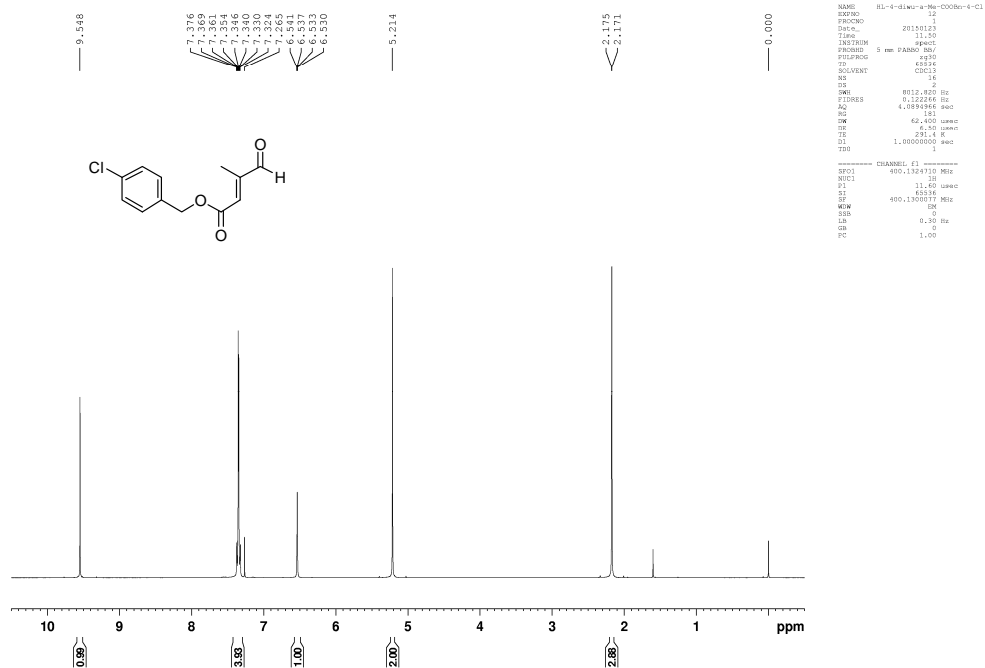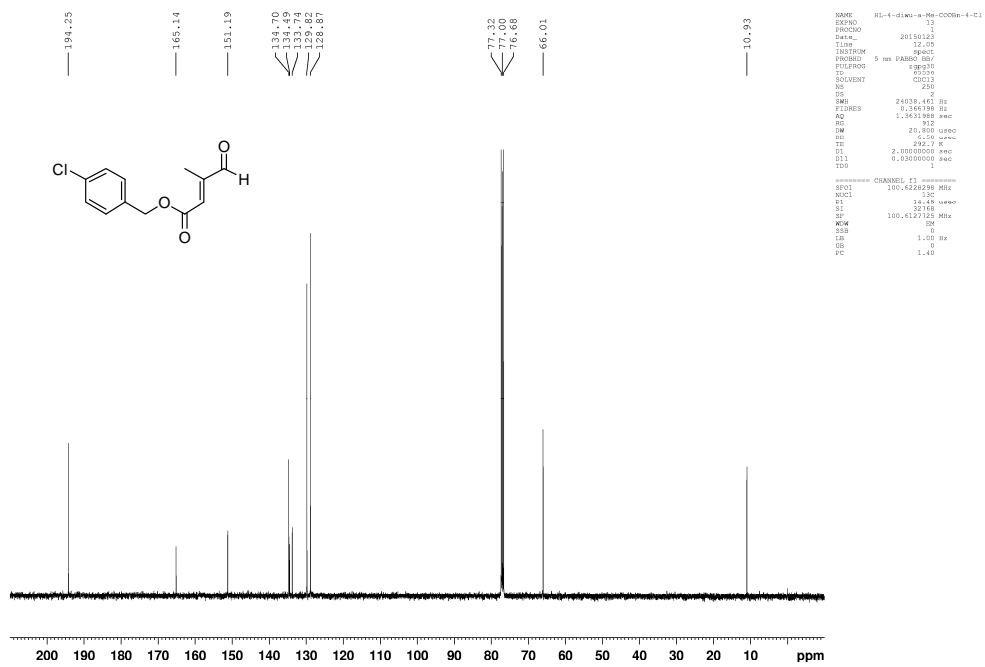

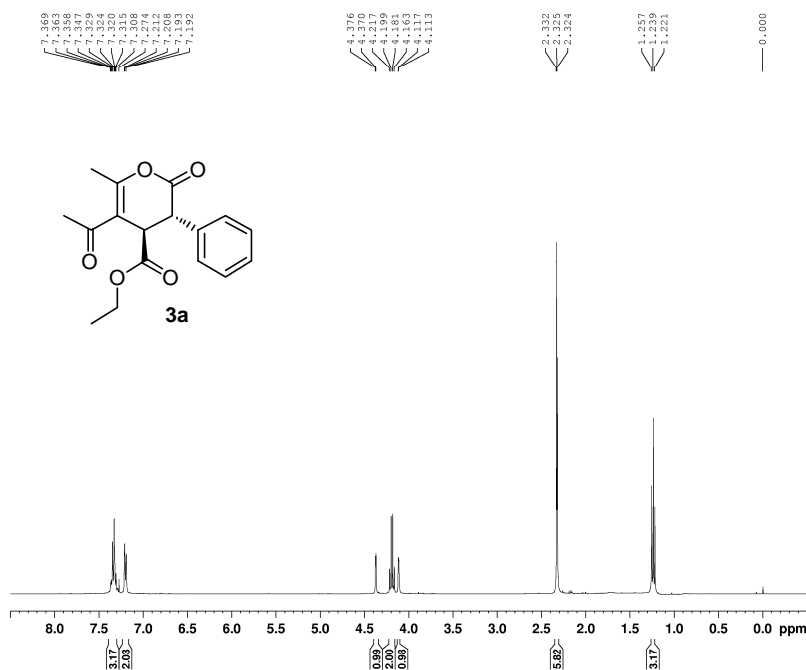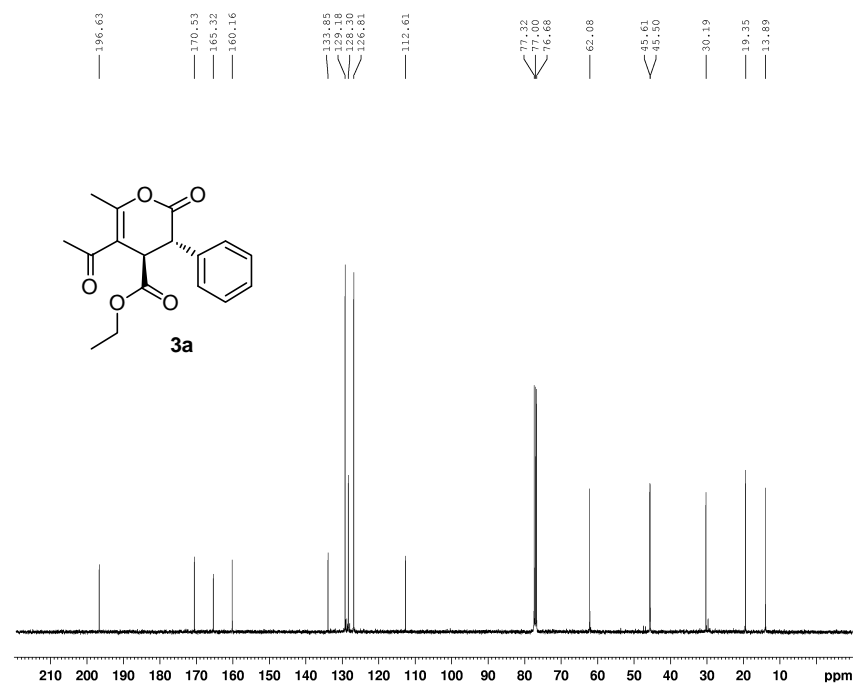

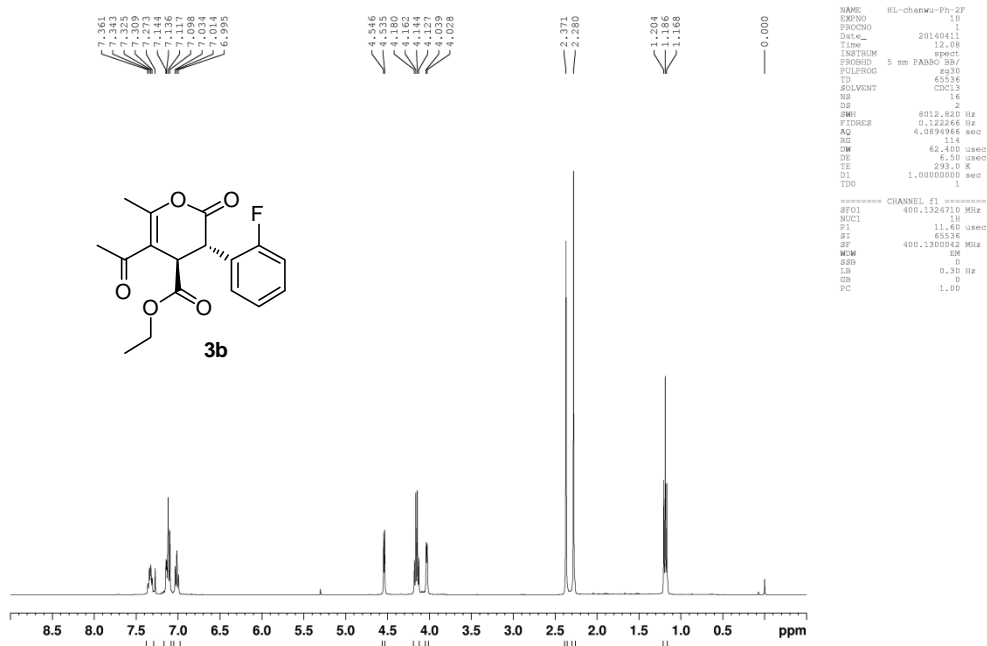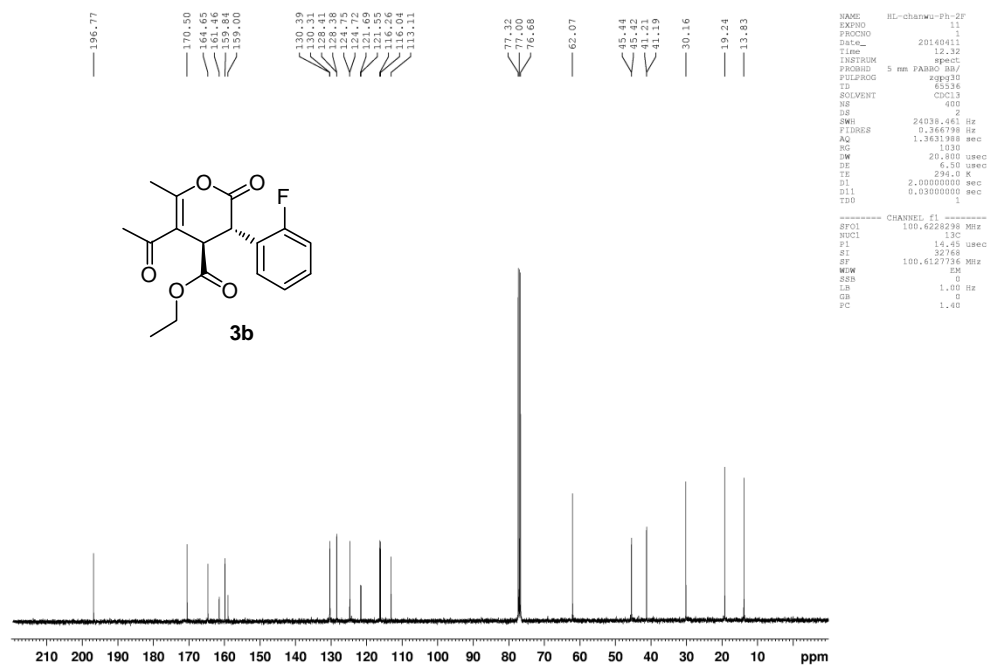

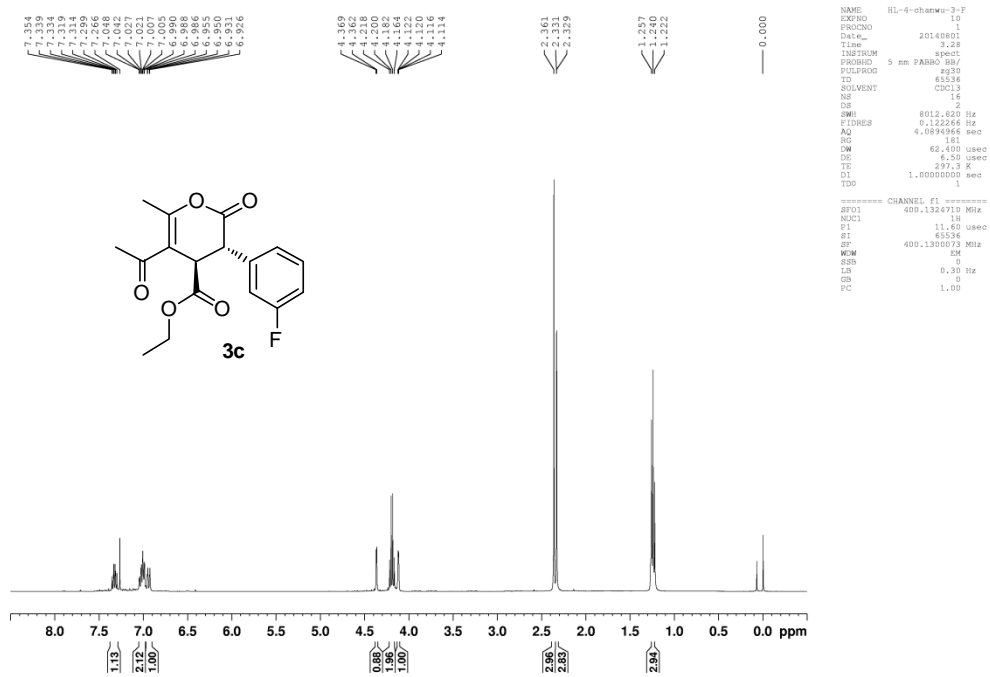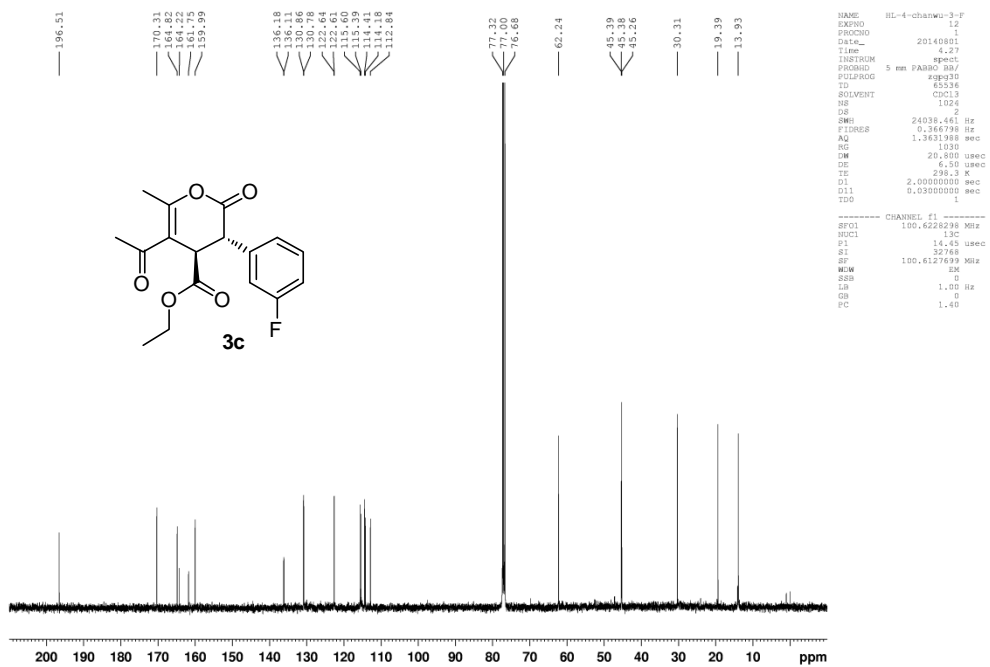



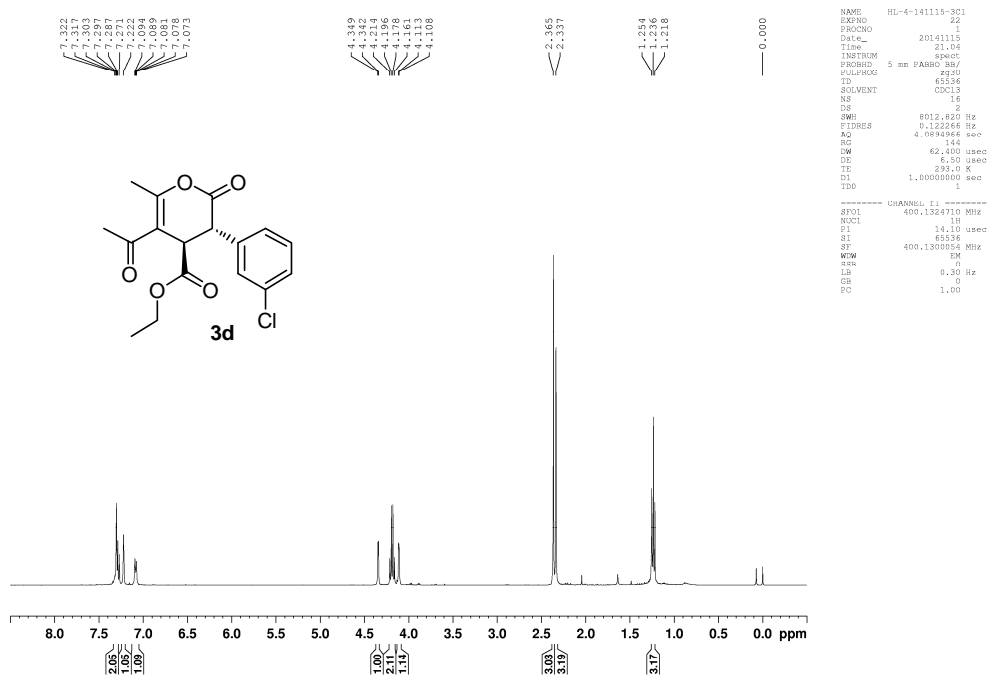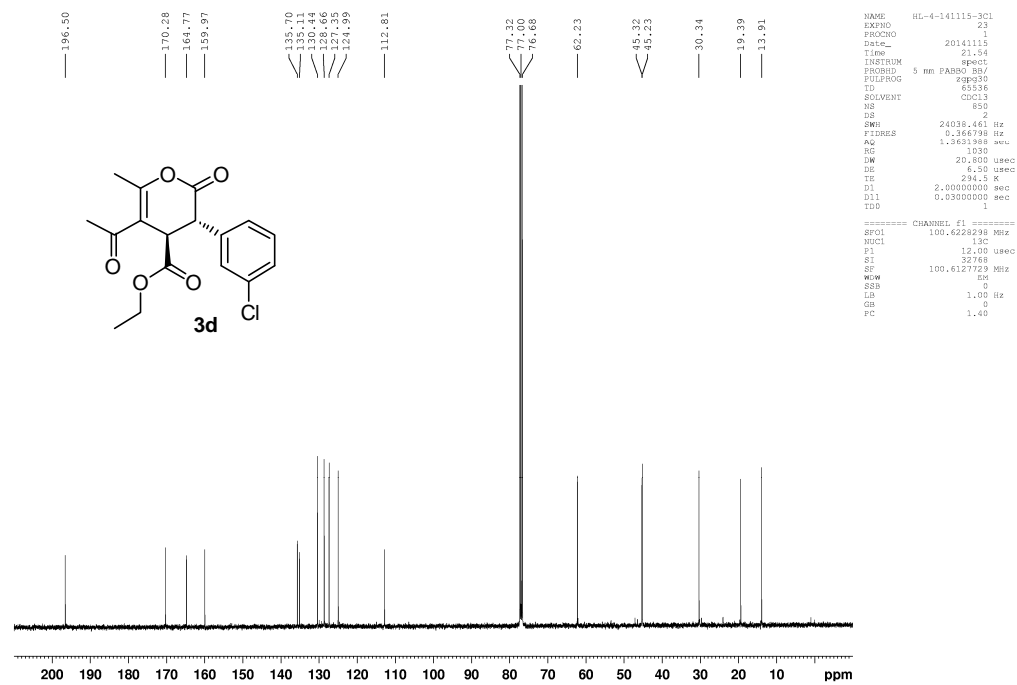

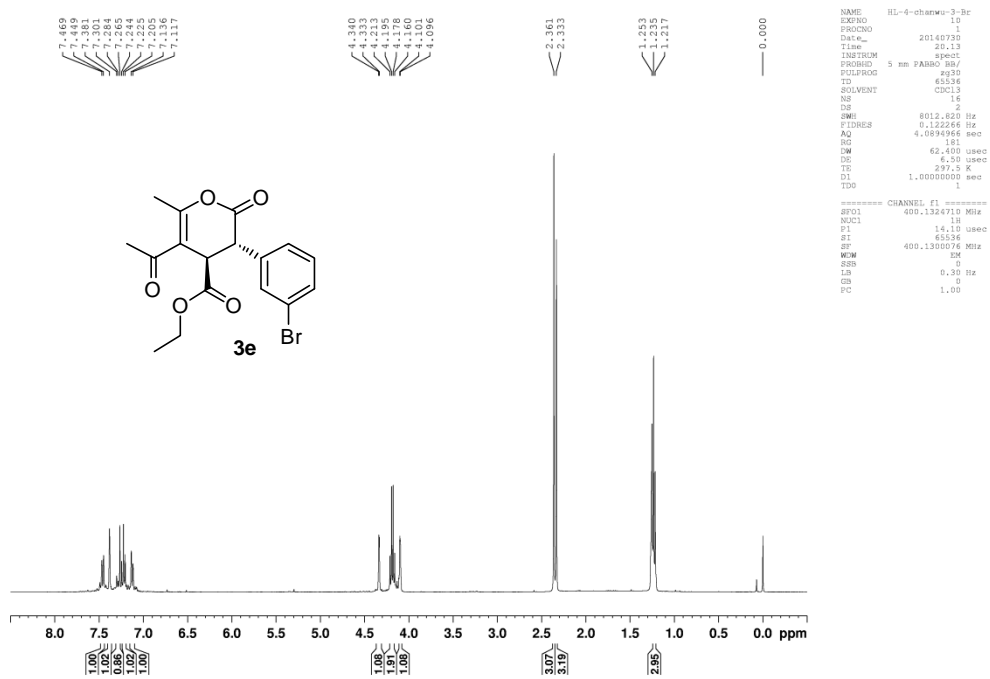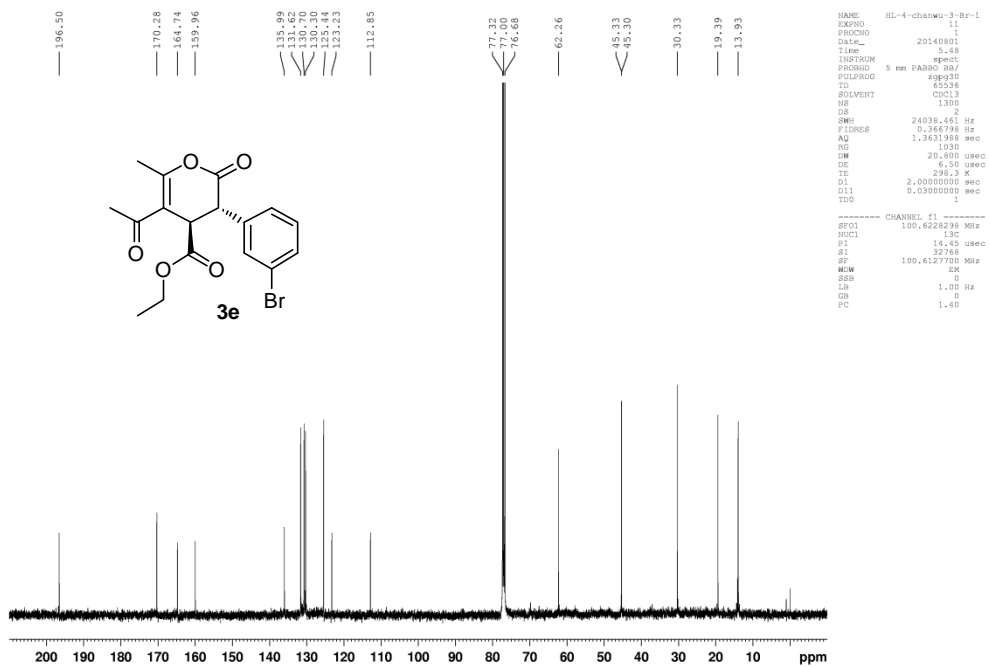

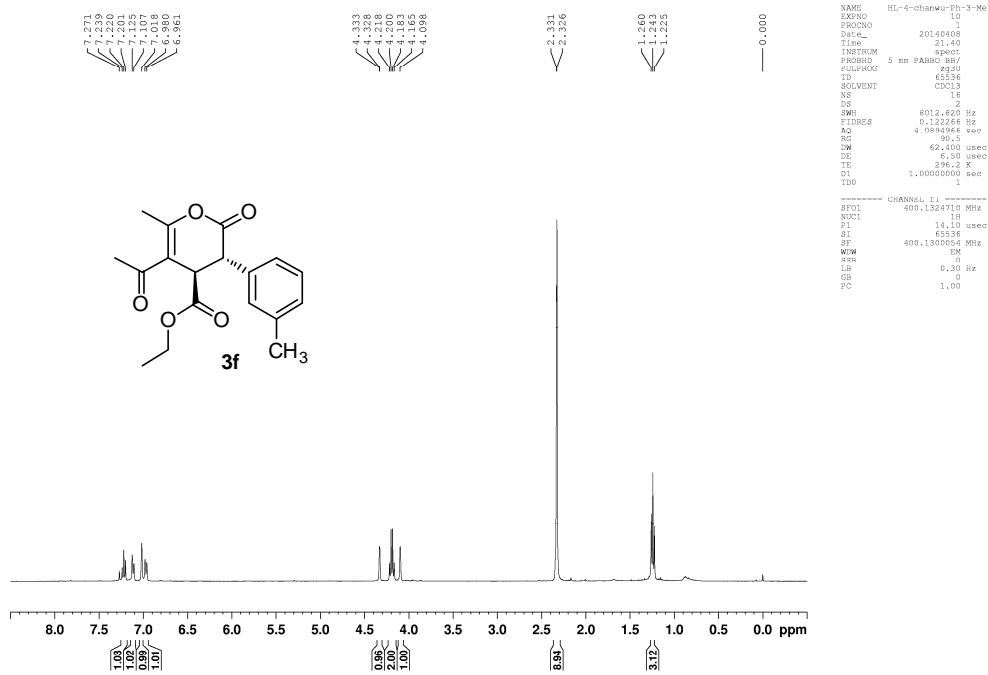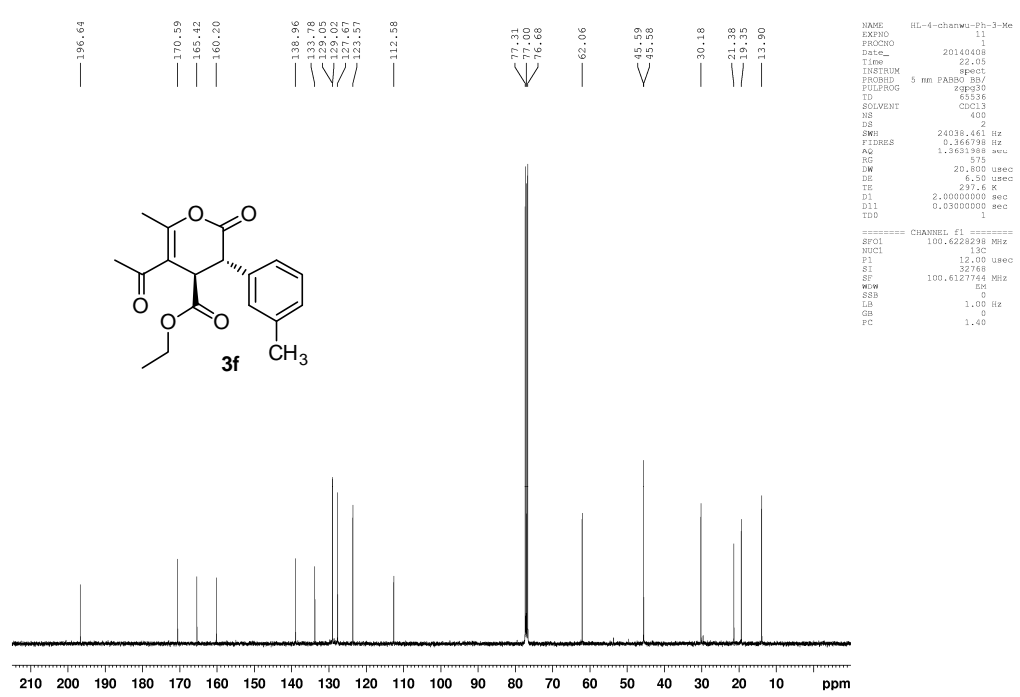

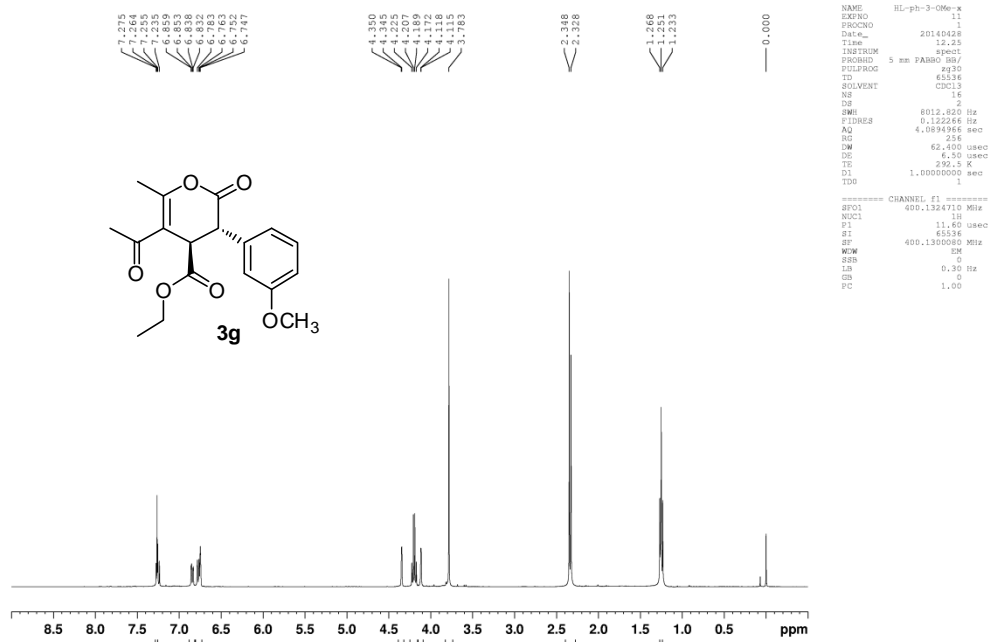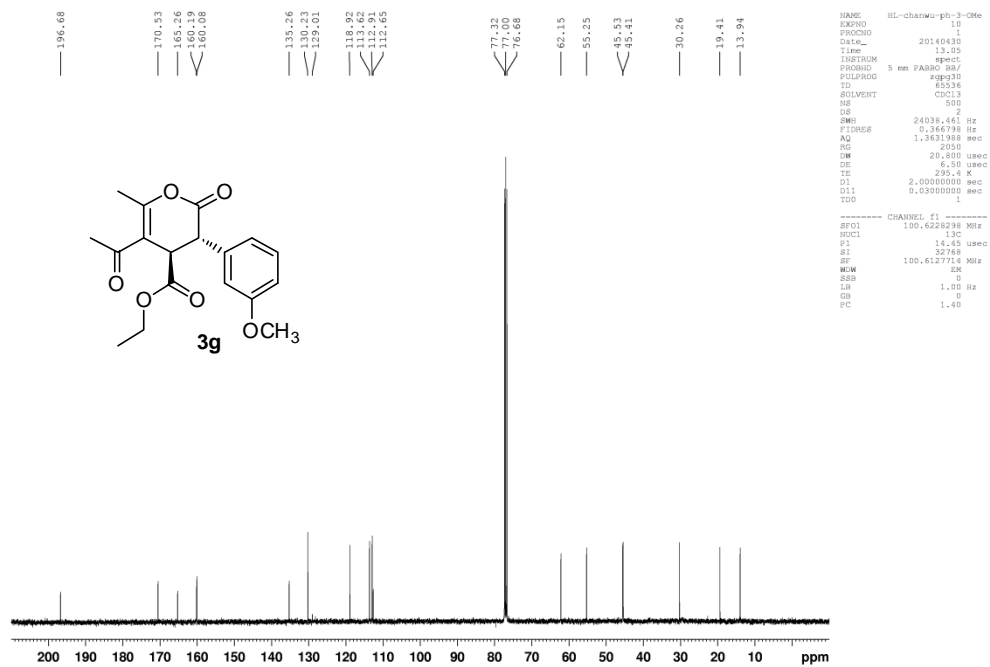

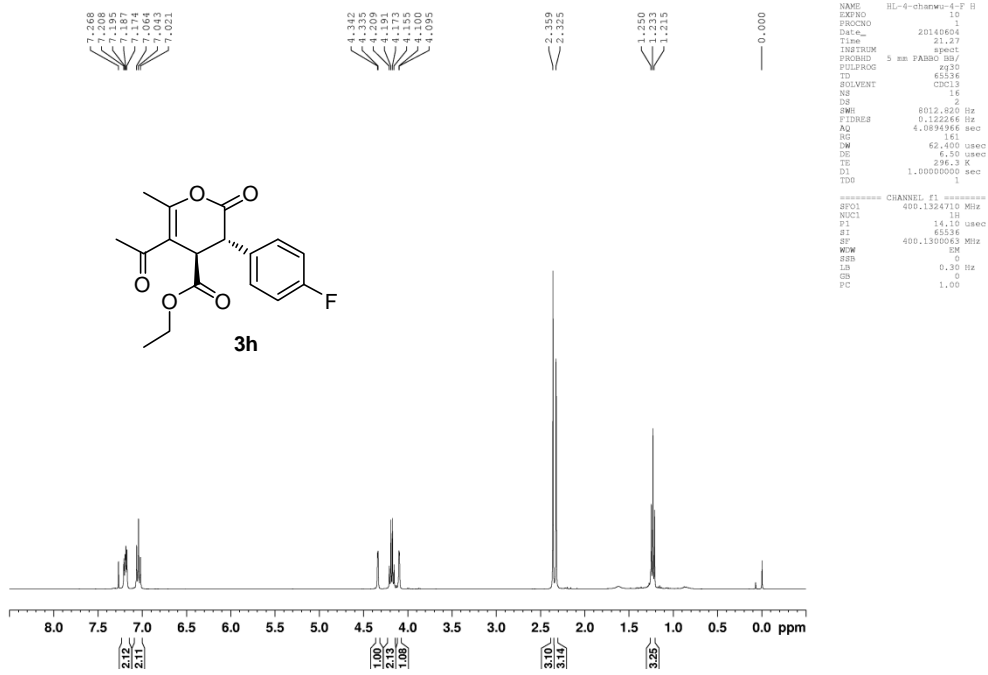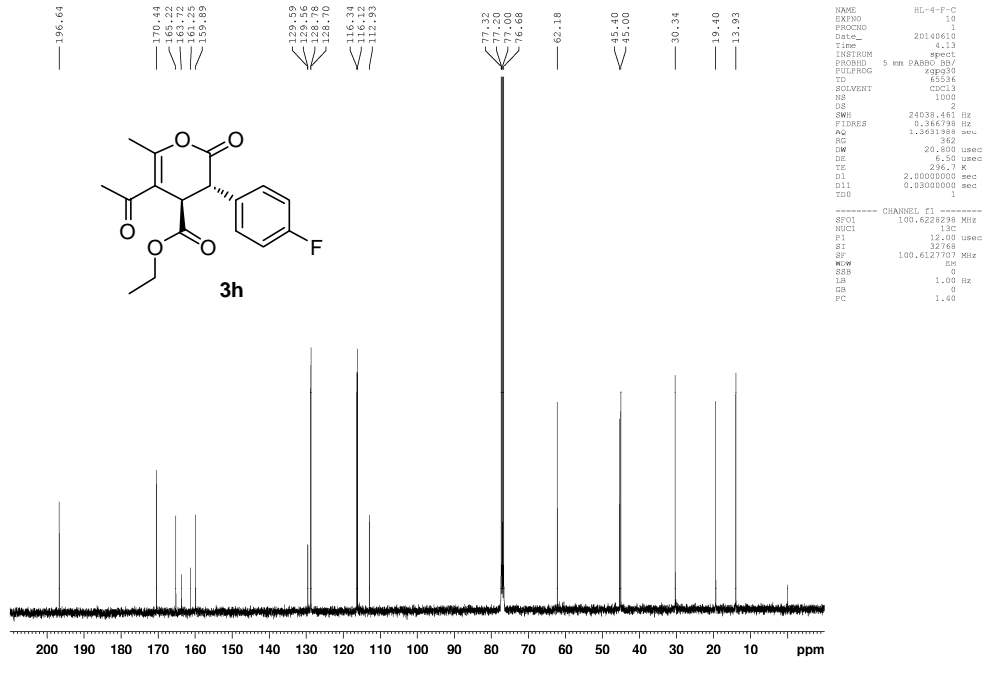

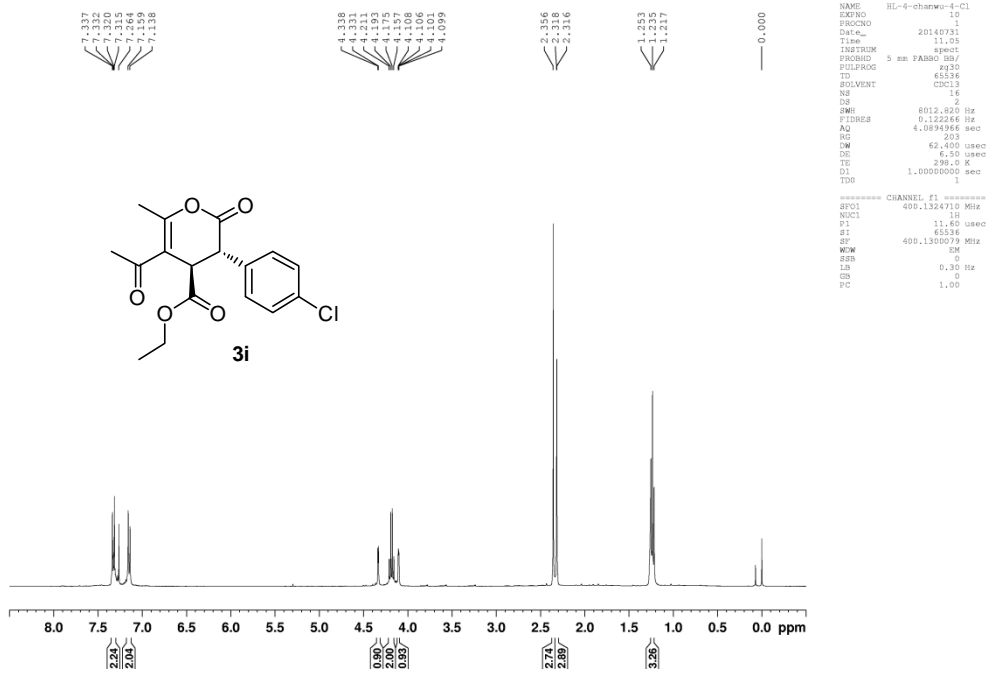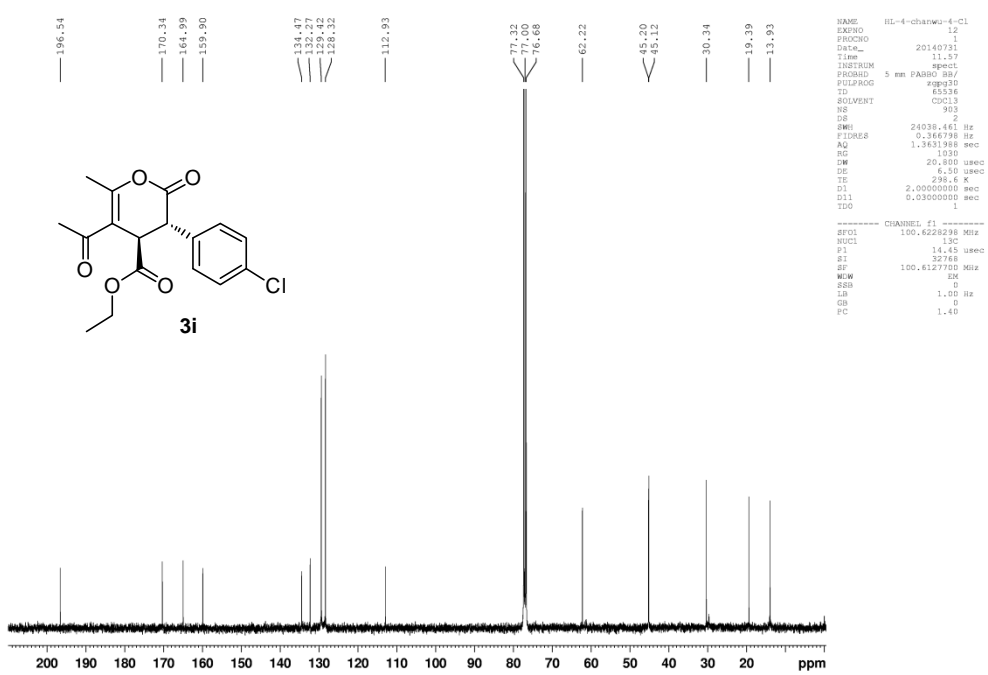

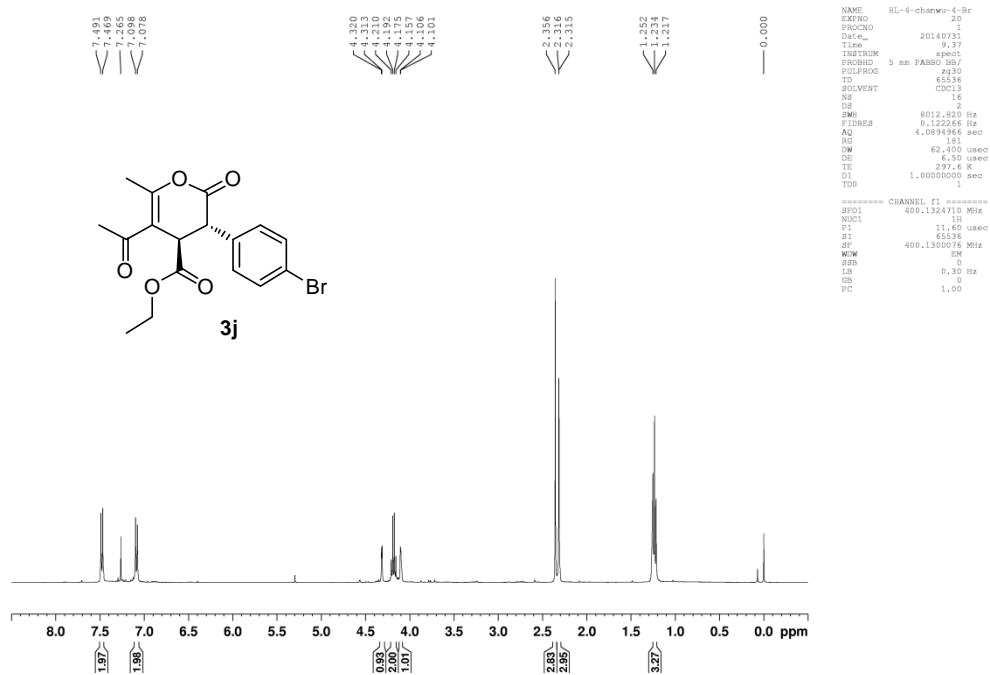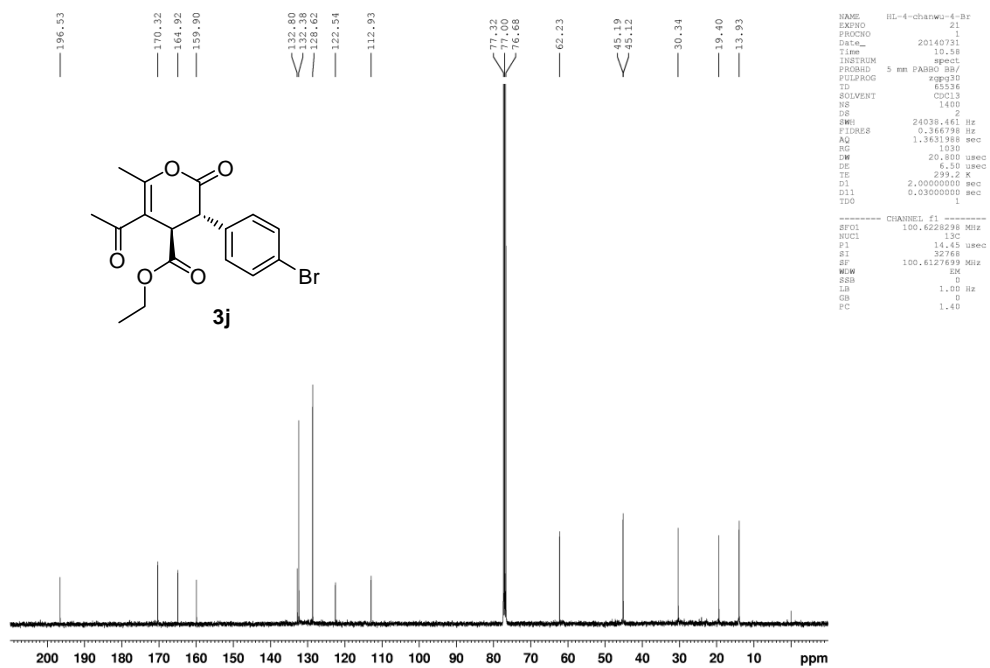

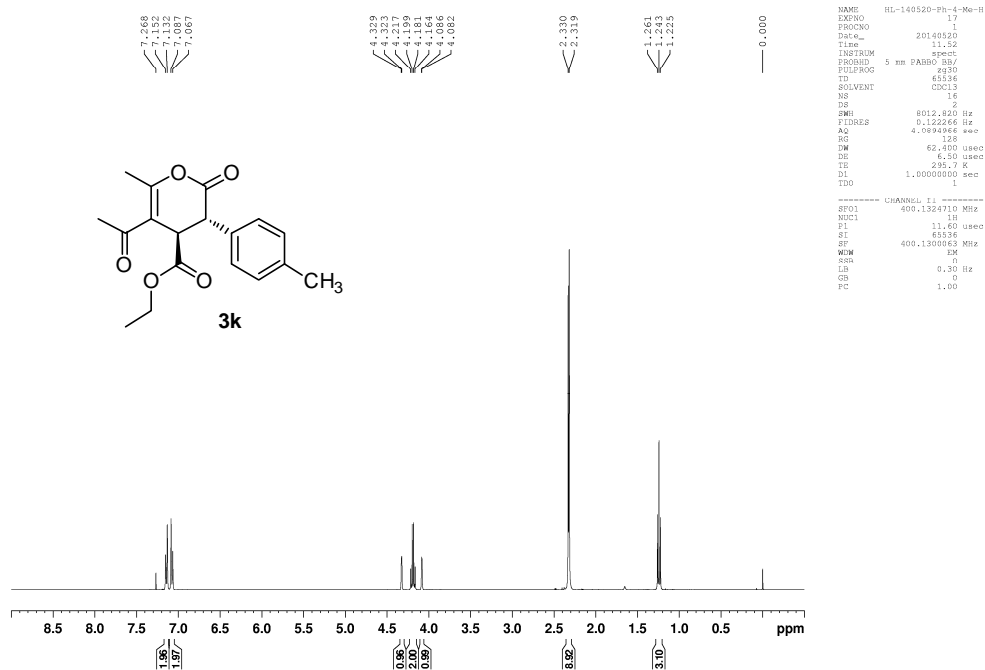

```

NAME      HL-140520-Ph-4-Me-H
EXPNO    1
PROCNO   1
Date_    20140520
Time     11.32
INSTRUM  spect
PROBHD   5 mm PABBO 30V
PULPROG  zg30
TD        65536
SOLVENT  CDCl3
NS        16
DS        2
SWH       8012.820 Hz
FIDRES   0.122266 Hz
AQ        4.0894966 sec
RG        128
DM        62.400 usec
DE        6.30 usec
TE        295.7 K
D1        1.00000000 sec
TDO       1
----- CHANNEL f1 -----
SFO1     400.1324710 MHz
NUC1     1H
P1        11.400 usec
SI        65536
SF        400.1300063 MHz
WWM       EX
SOLVENT  CDCl3
LB        0.30 Hz
GB        0
PC        1.00

```

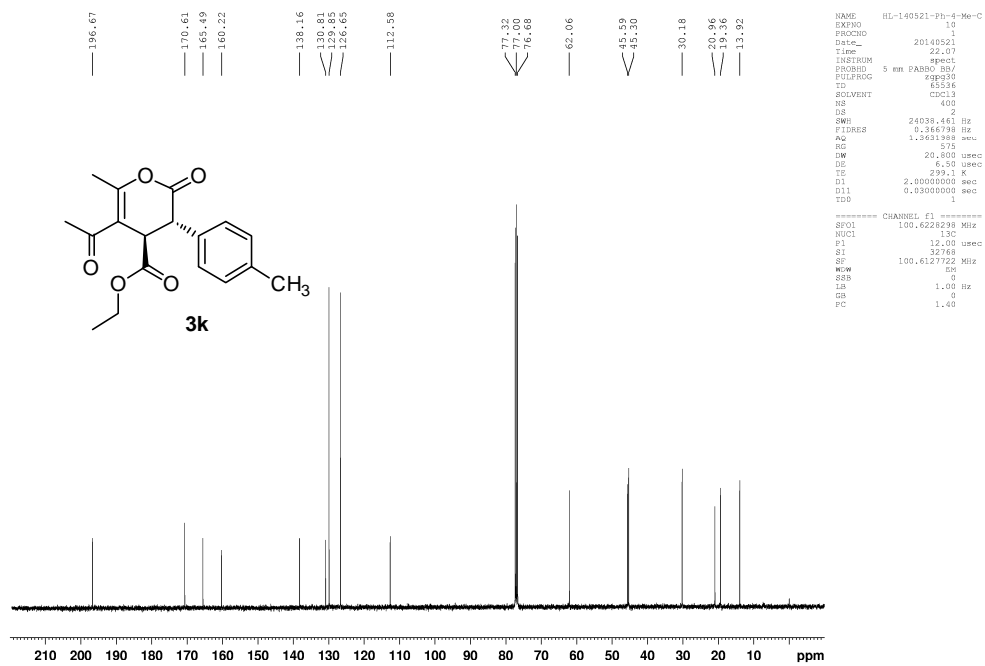

```

NAME      HL-140521-Ph-4-Me-C
EXPNO    1
PROCNO   1
Date_    20140521
Time     22.07
INSTRUM  spect
PROBHD   5 mm PABBO 30V
PULPROG  zg30
TD        65536
SOLVENT  CDCl3
NS        16
DS        2
SWH       24038.461 Hz
FIDRES   0.3868798 Hz
AQ        1.5631998 sec
RG        576
DM        20.800 usec
DE        6.30 usec
TE        299.1 K
D1        2.00000000 sec
D11       0.03000000 sec
TDO       1
----- CHANNEL f1 -----
SFO1     100.6228298 MHz
NUC1     13C
P1        12.000 usec
SI        32768
SF        100.6127722 MHz
WWM       EX
SOLVENT  CDCl3
LB        1.00 Hz
GB        0
PC        1.40

```



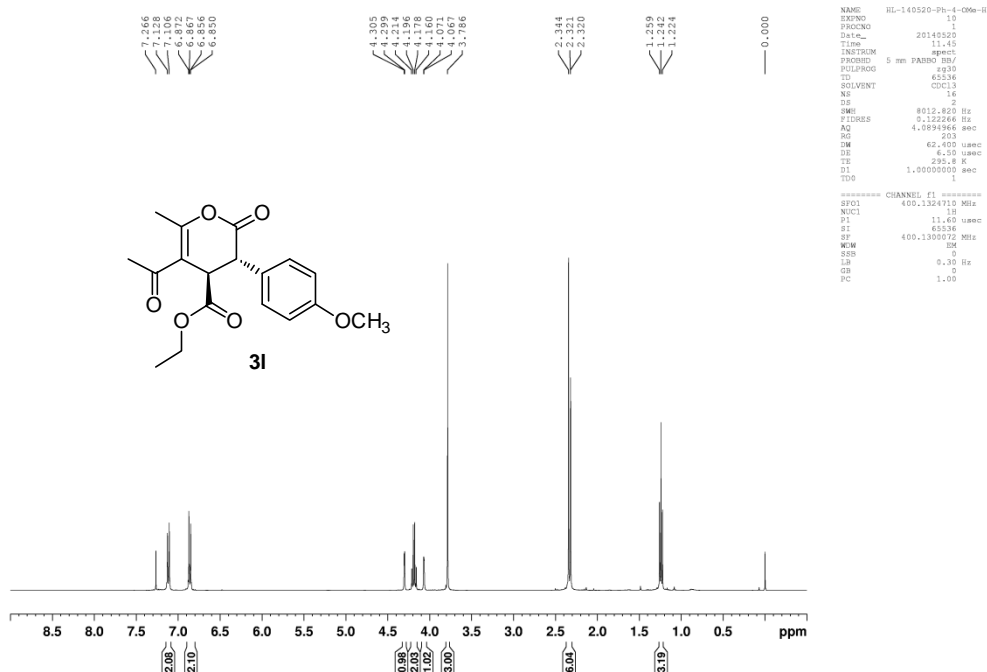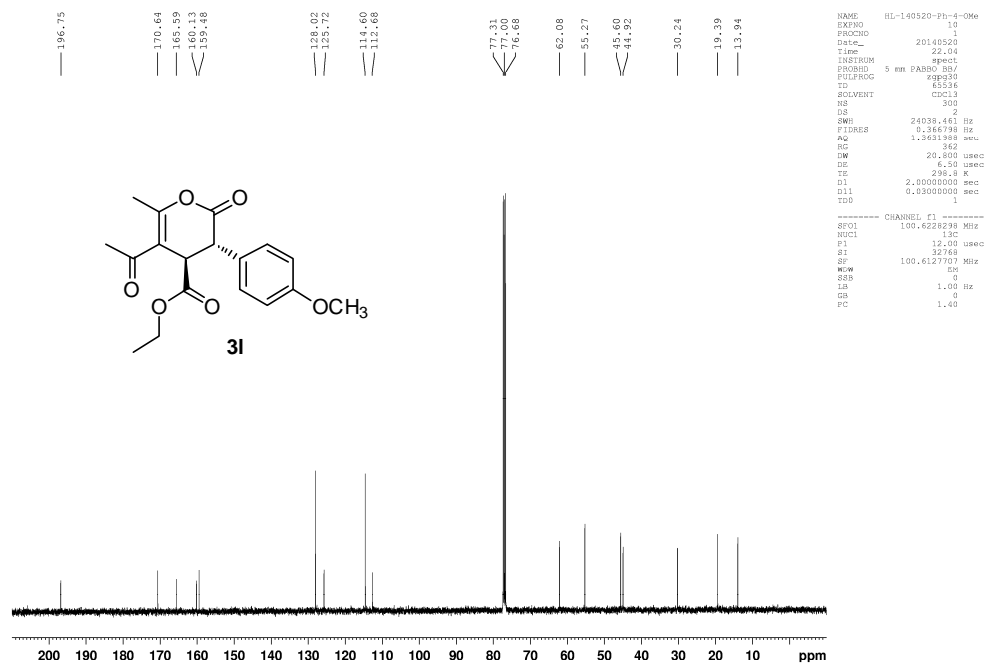

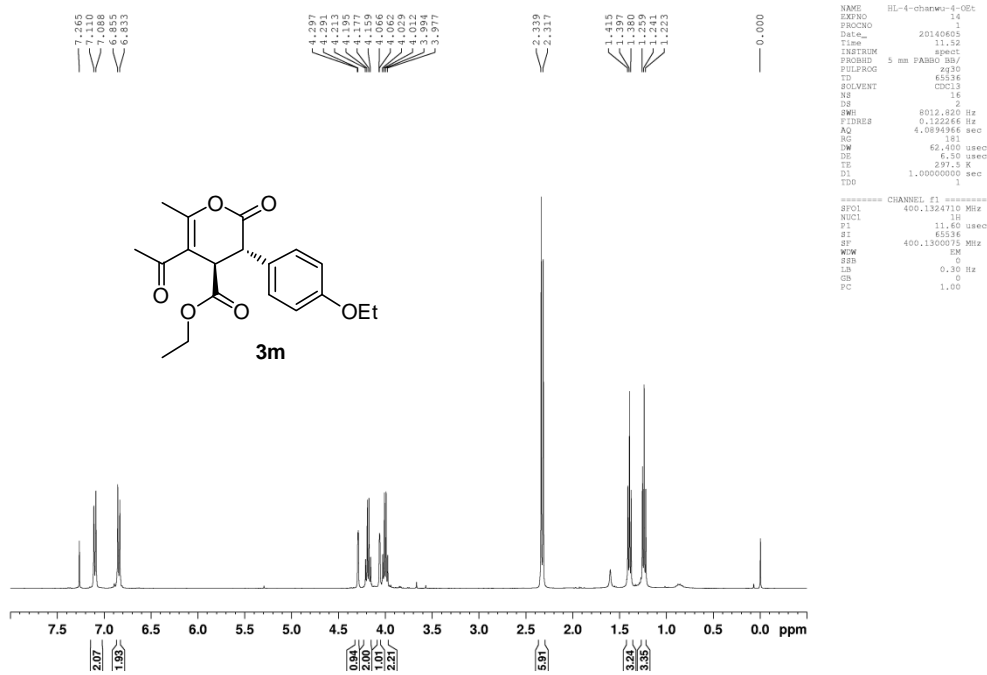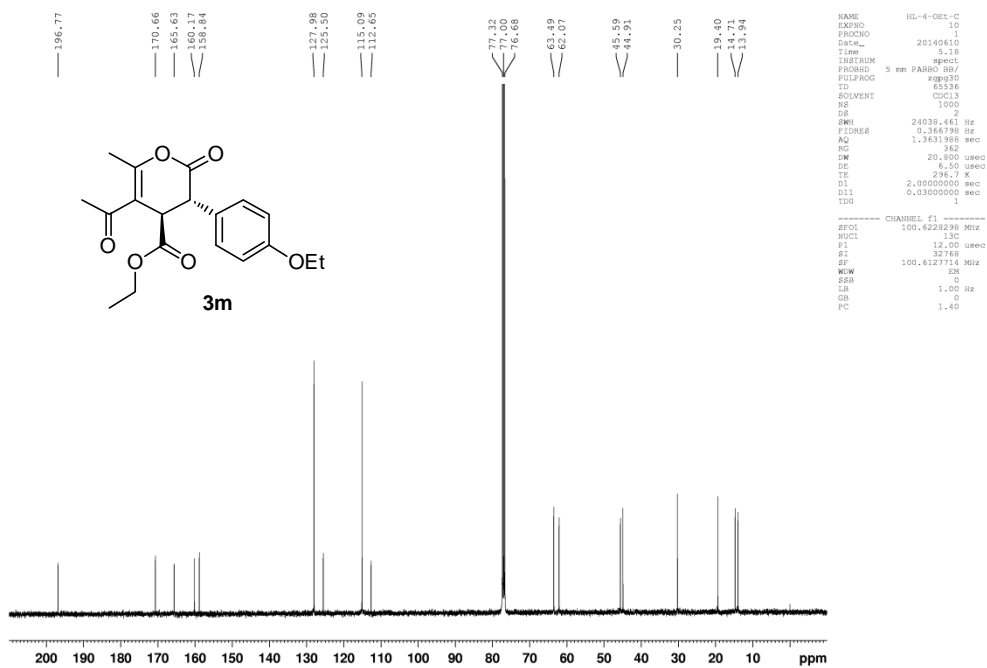

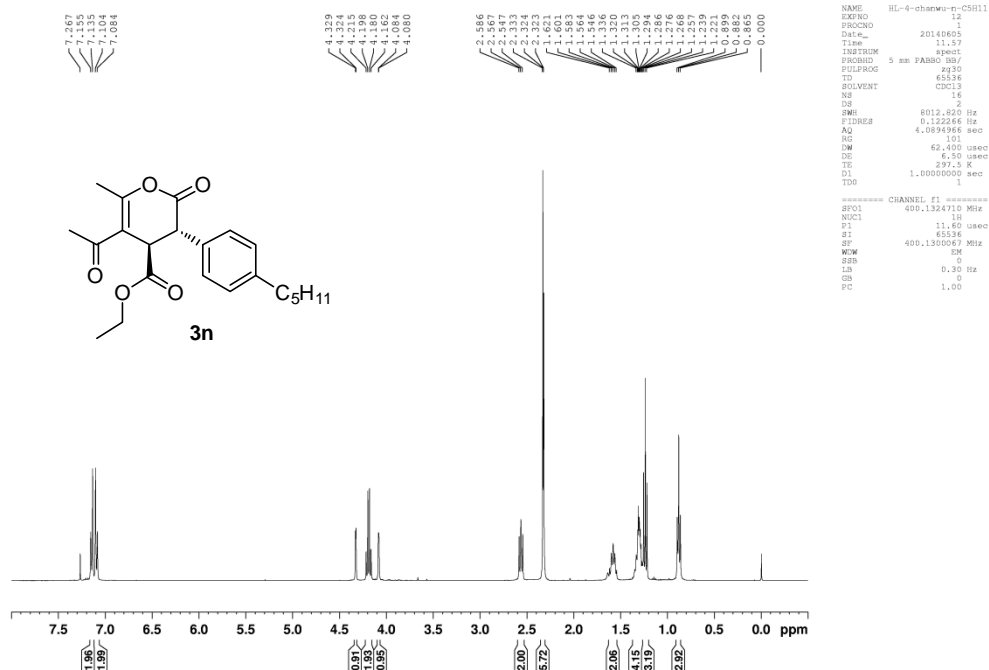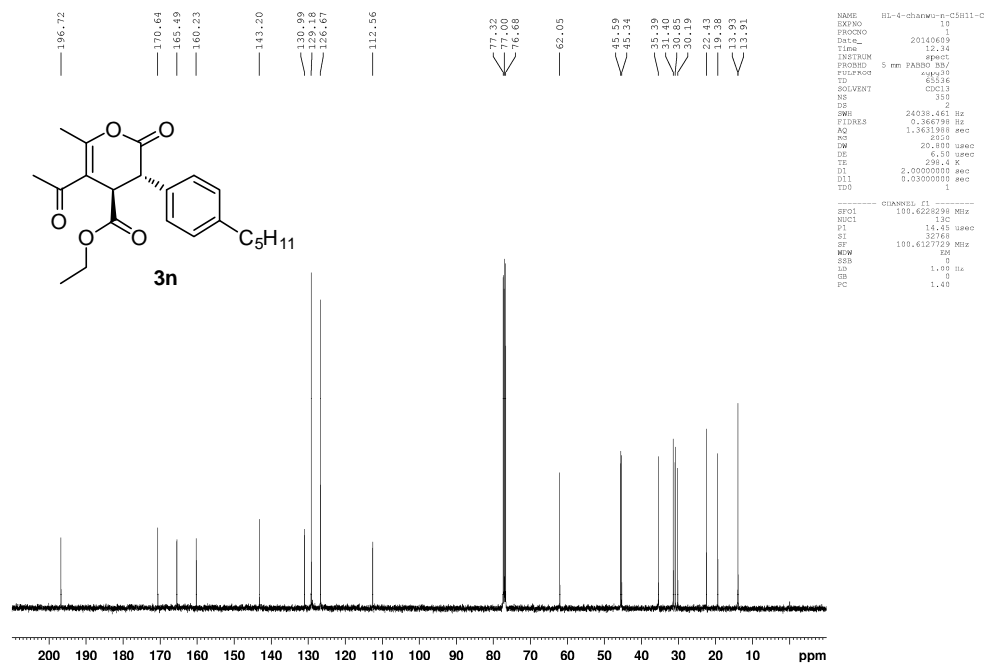

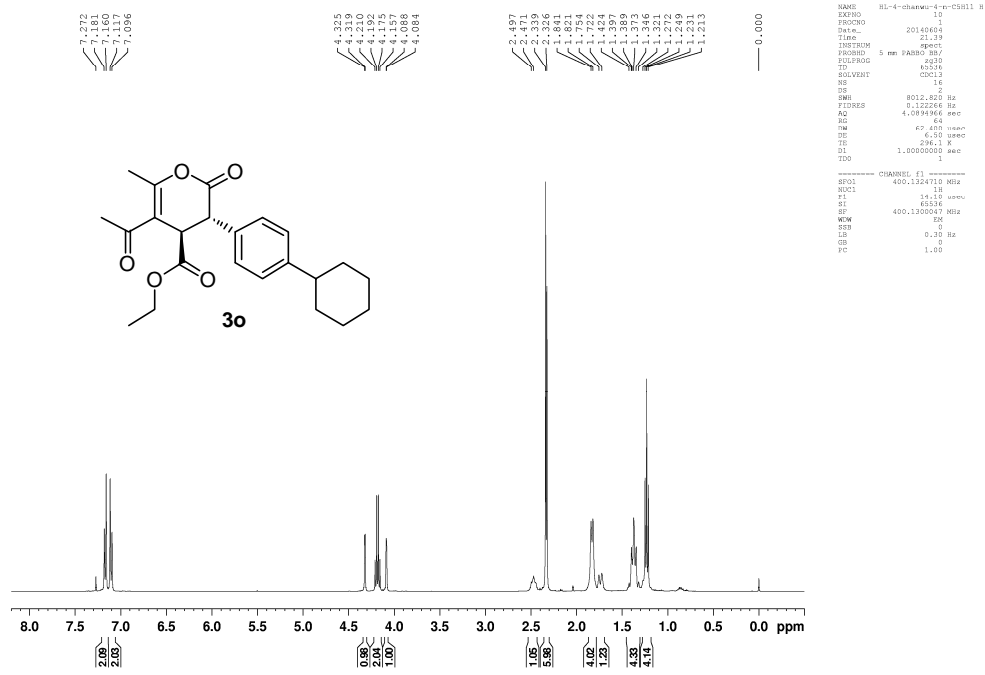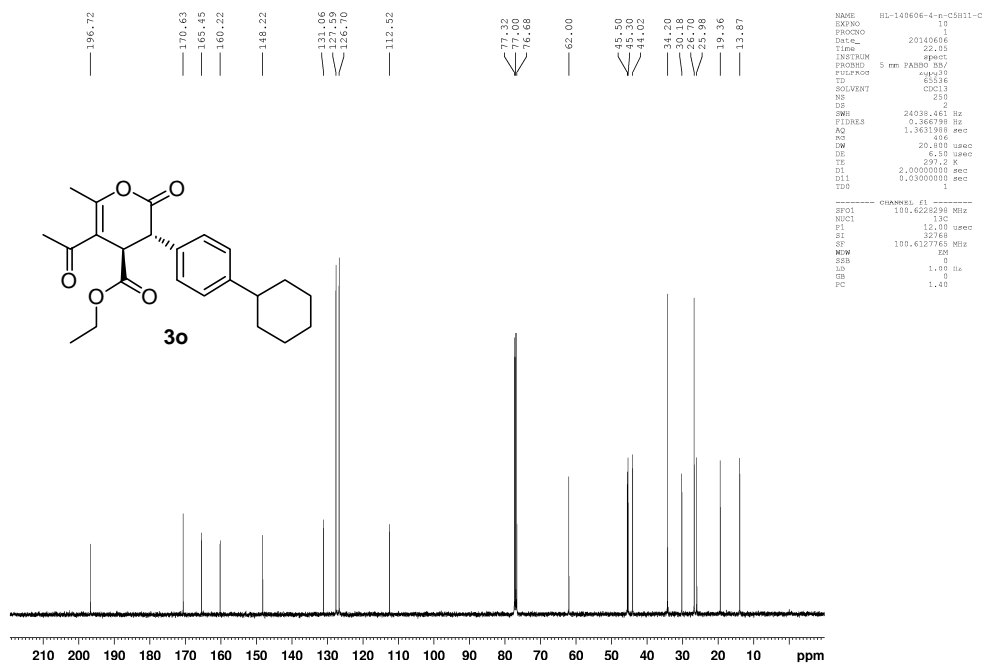

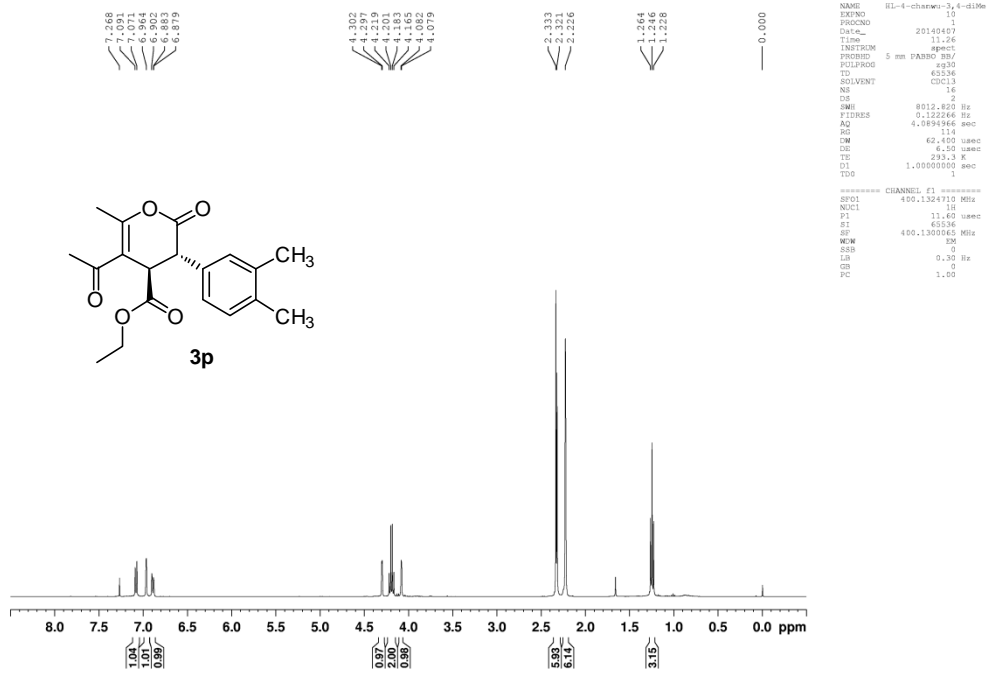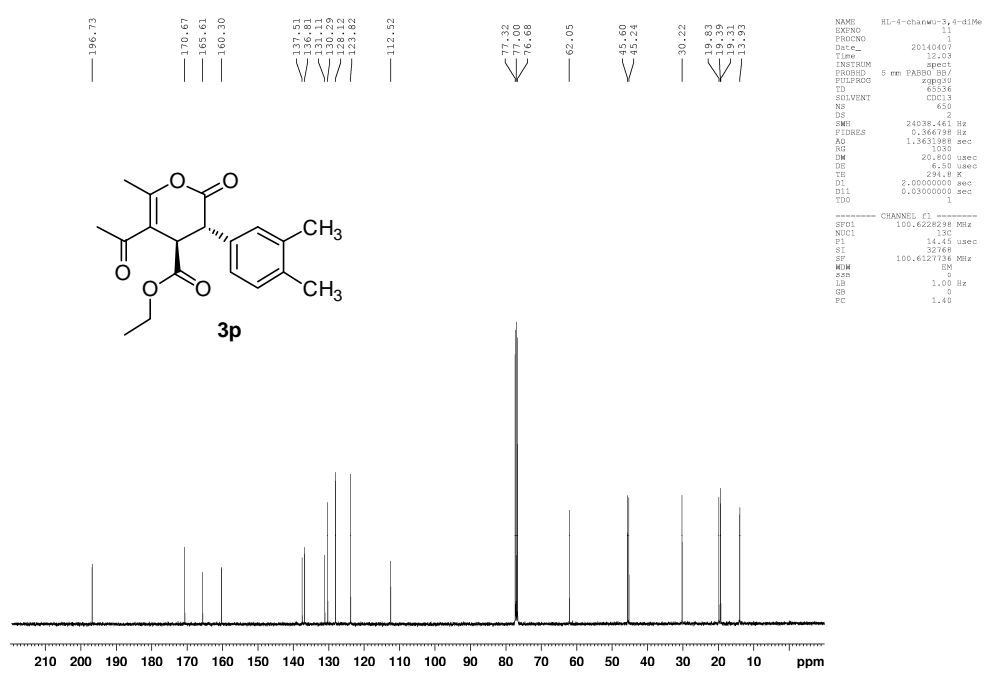

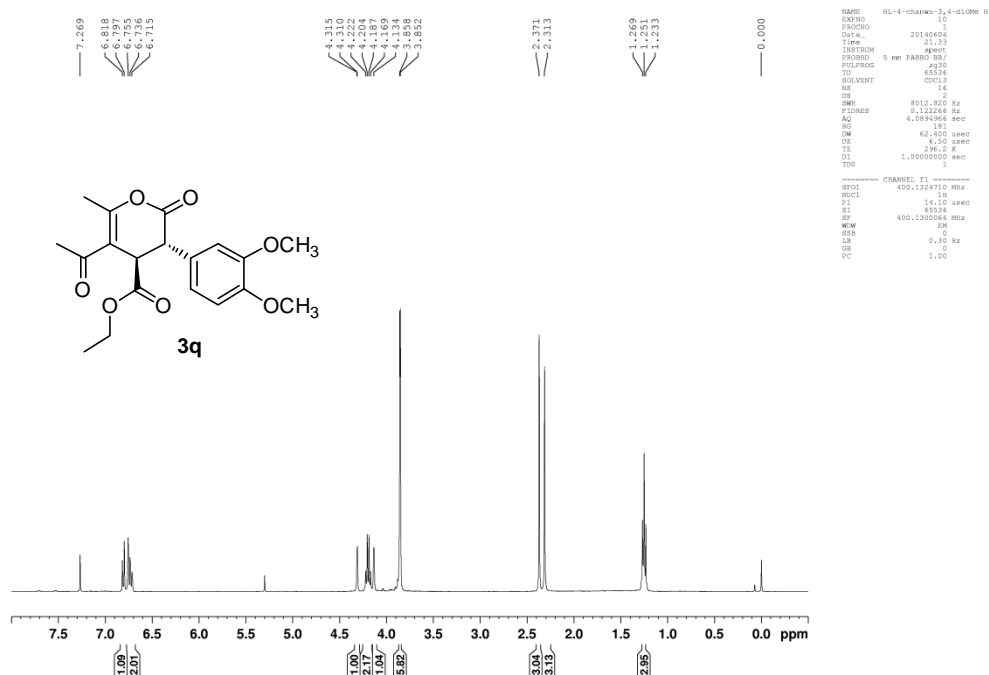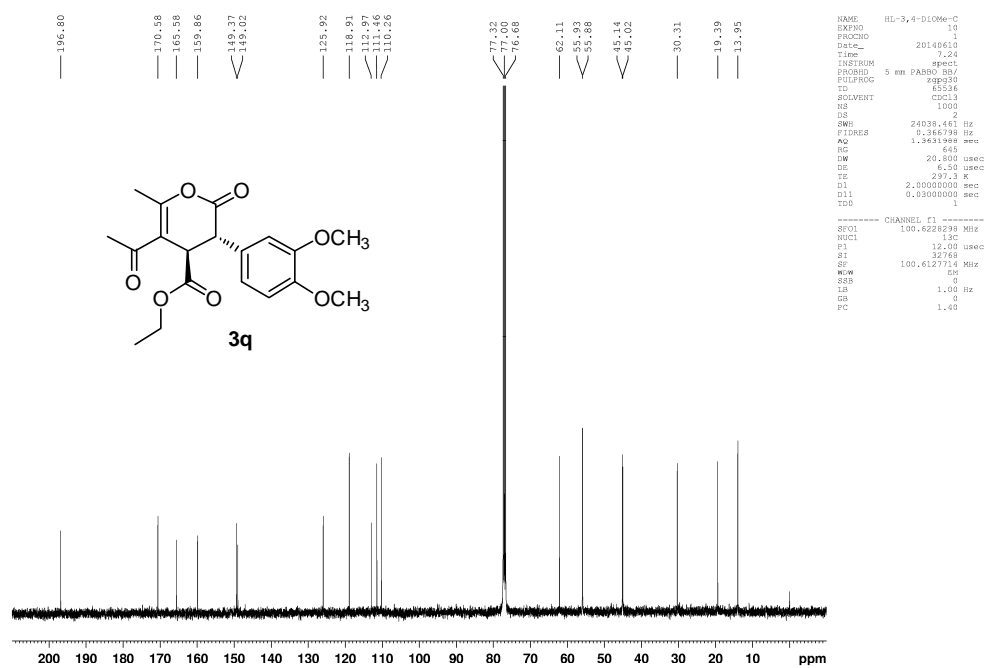

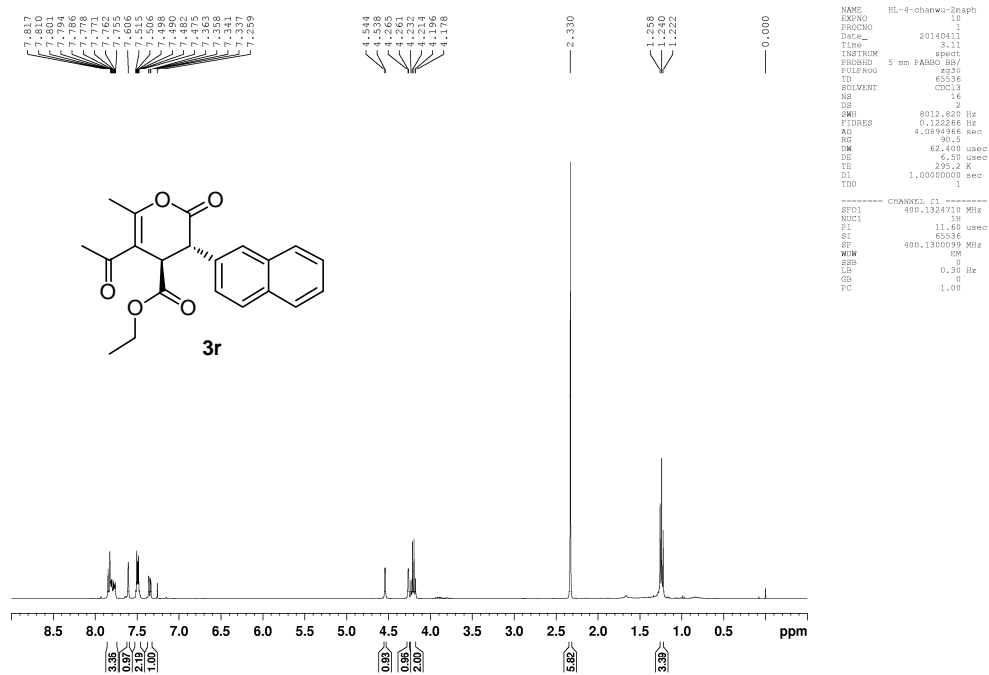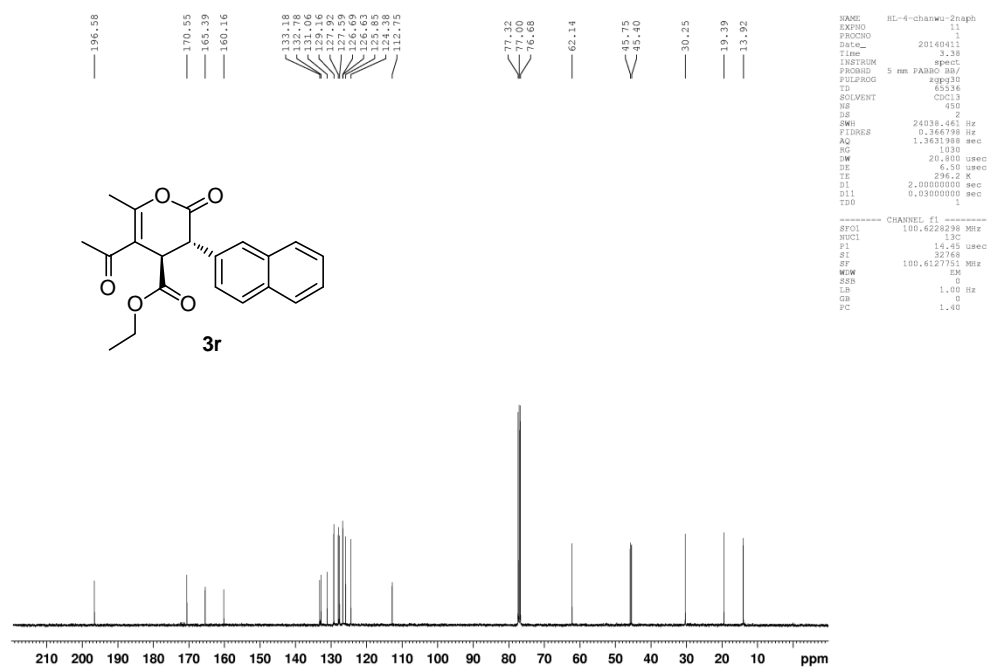

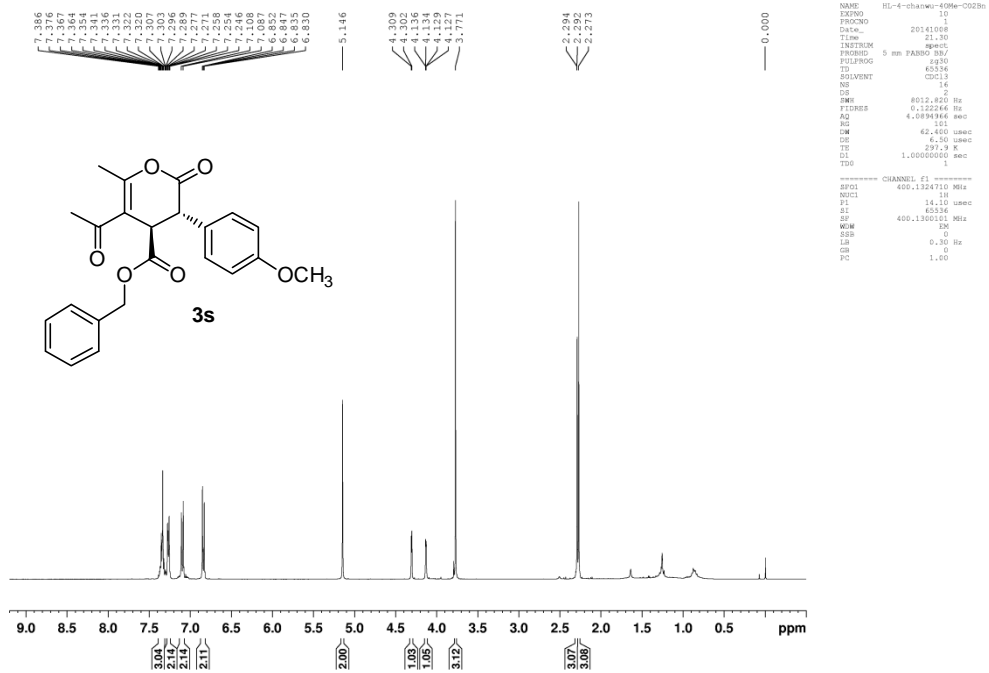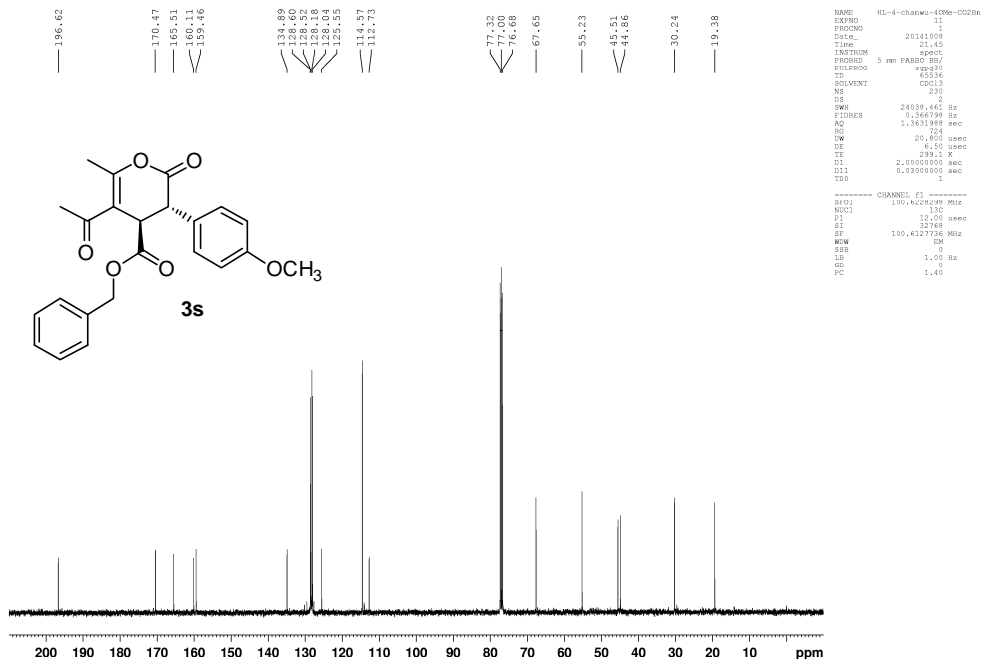



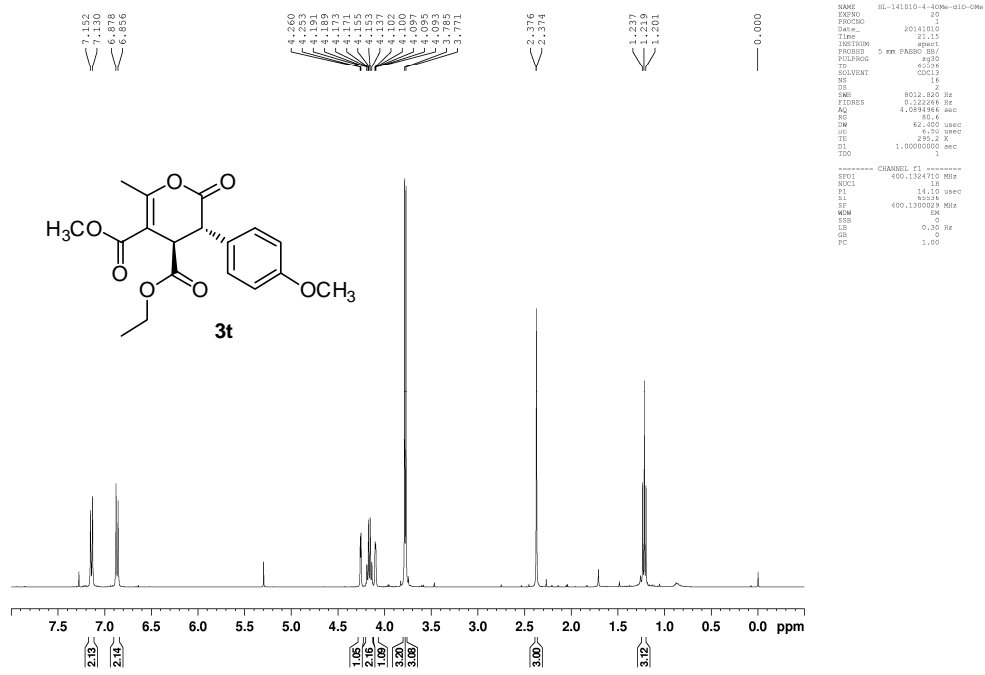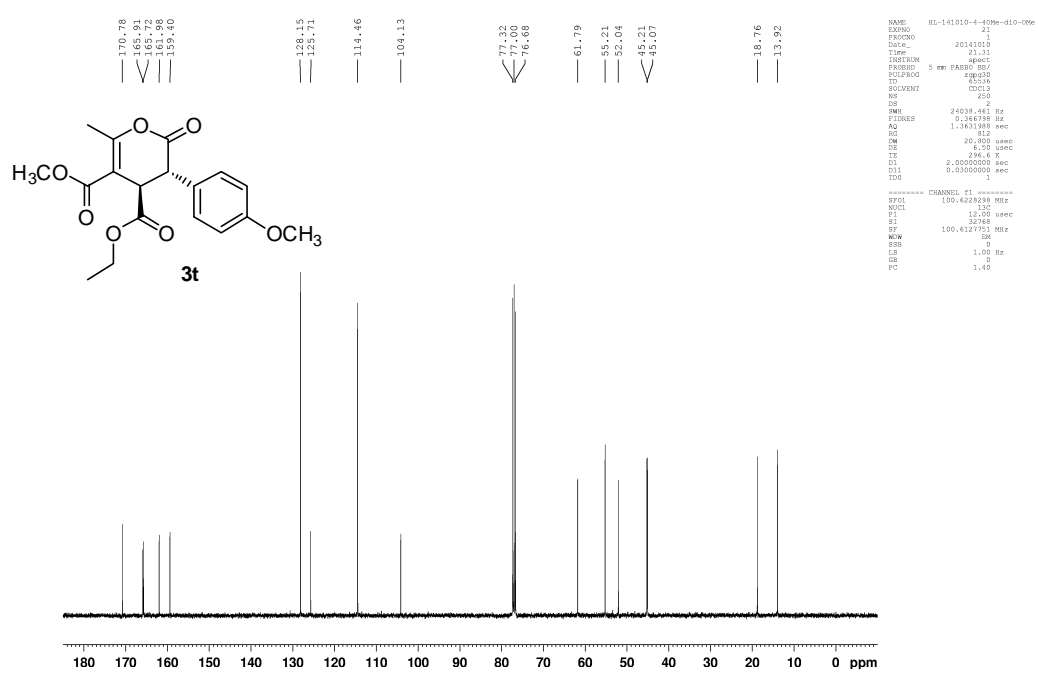

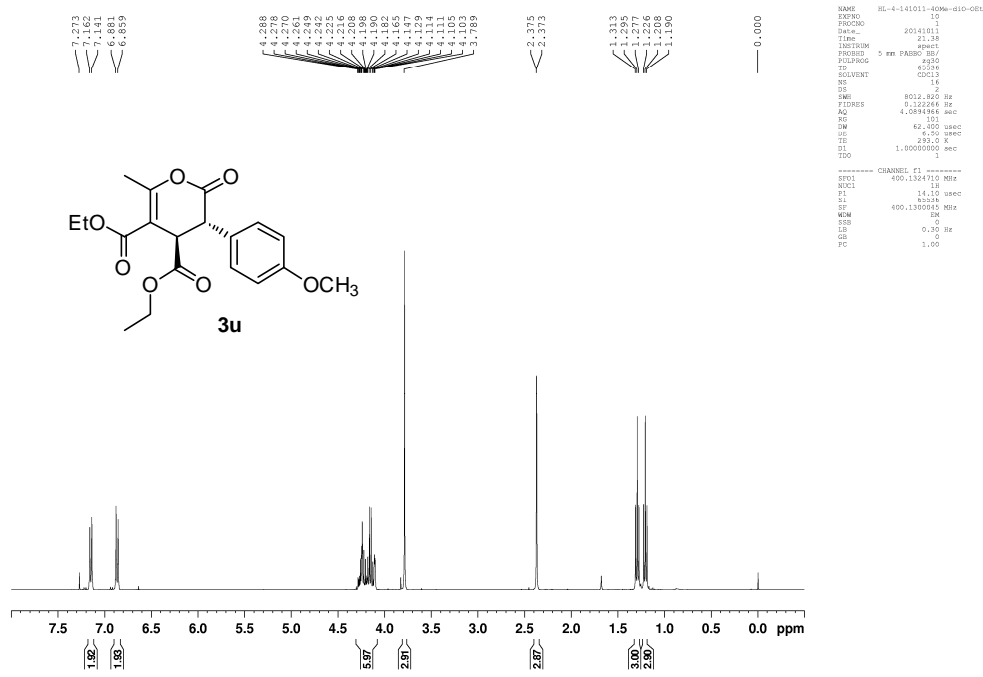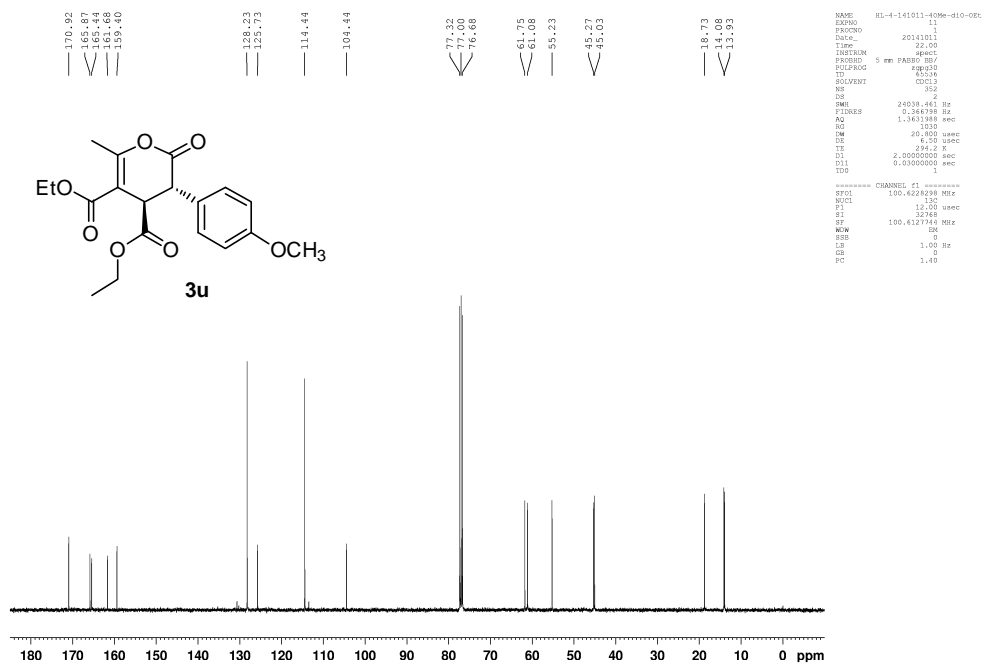

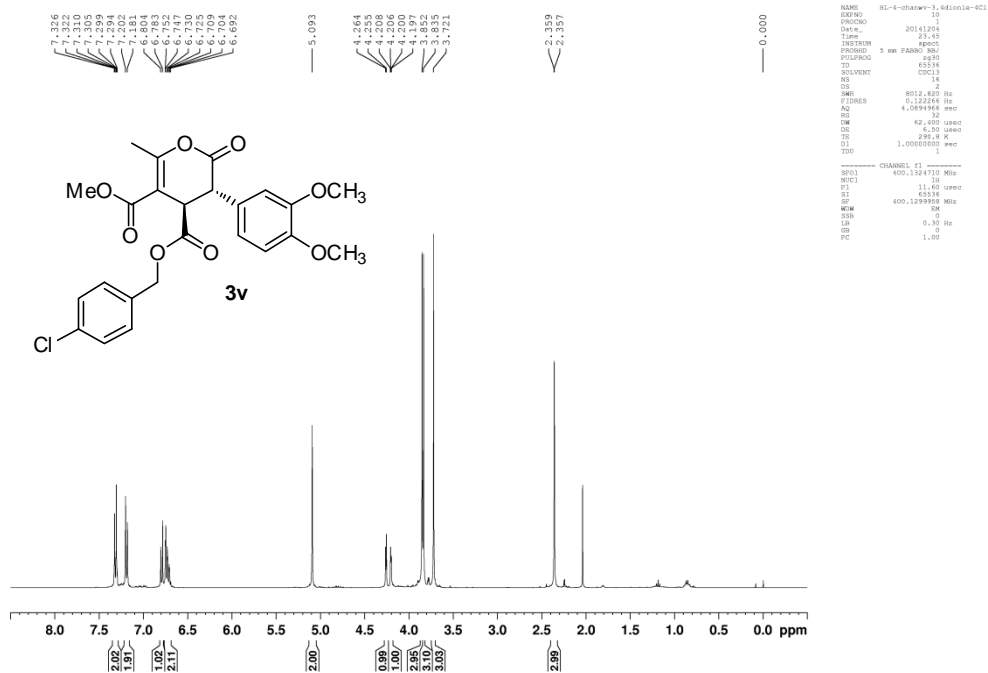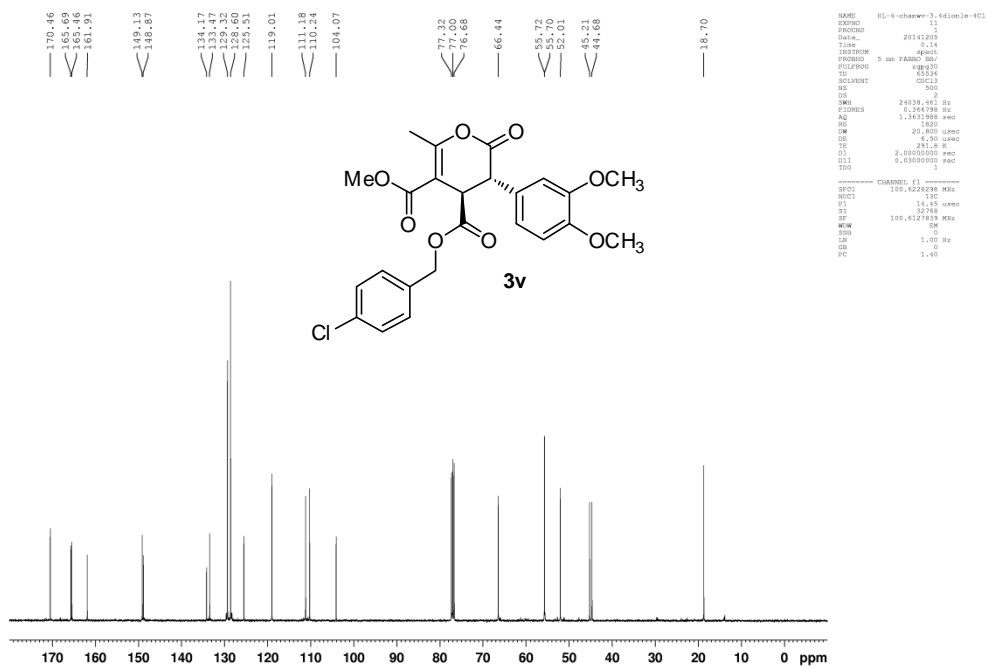

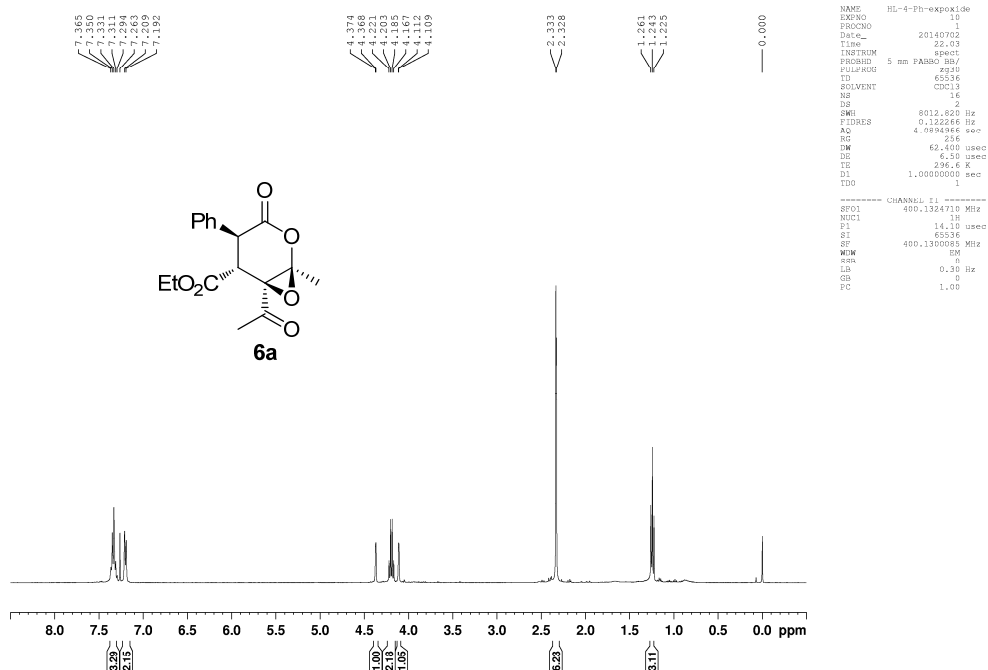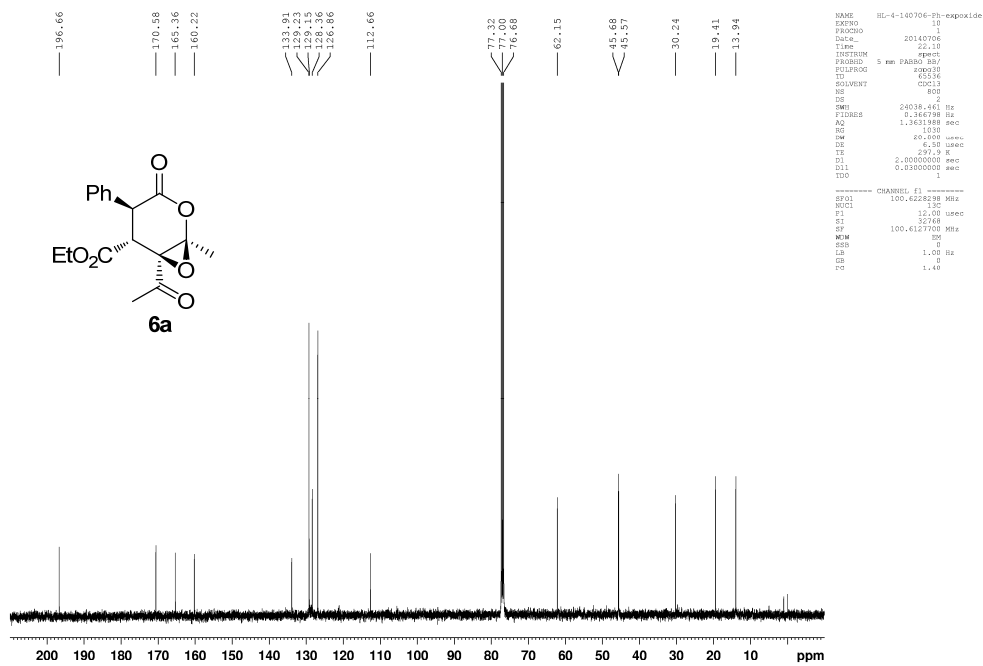

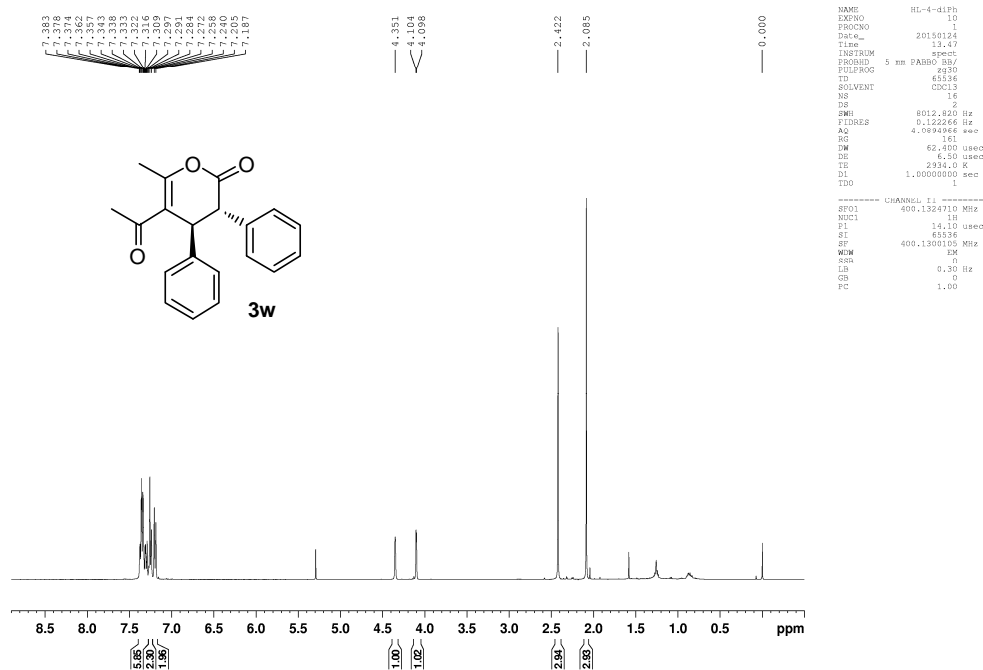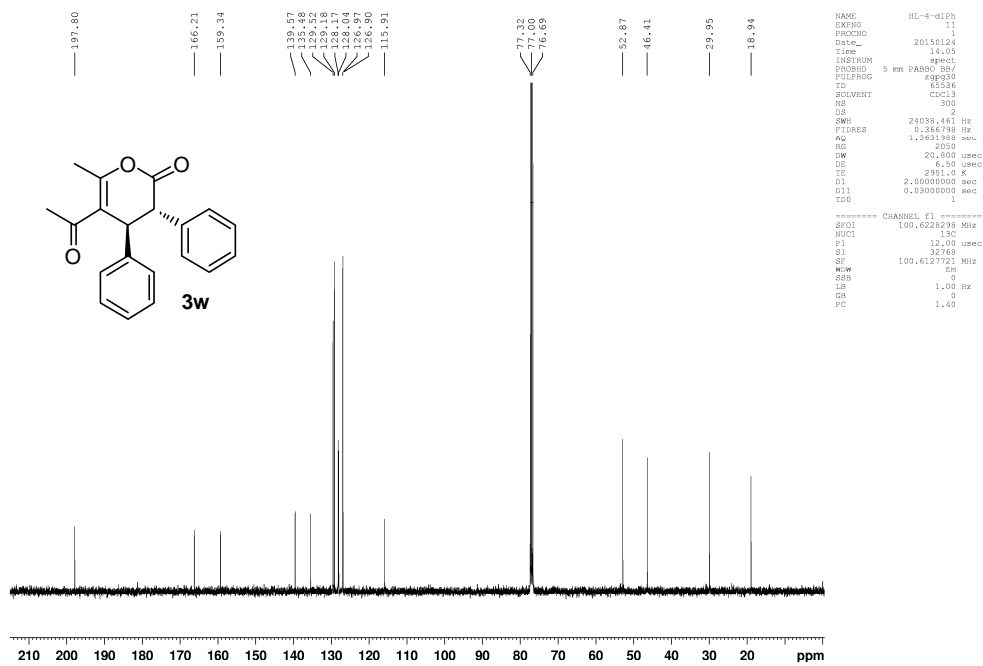

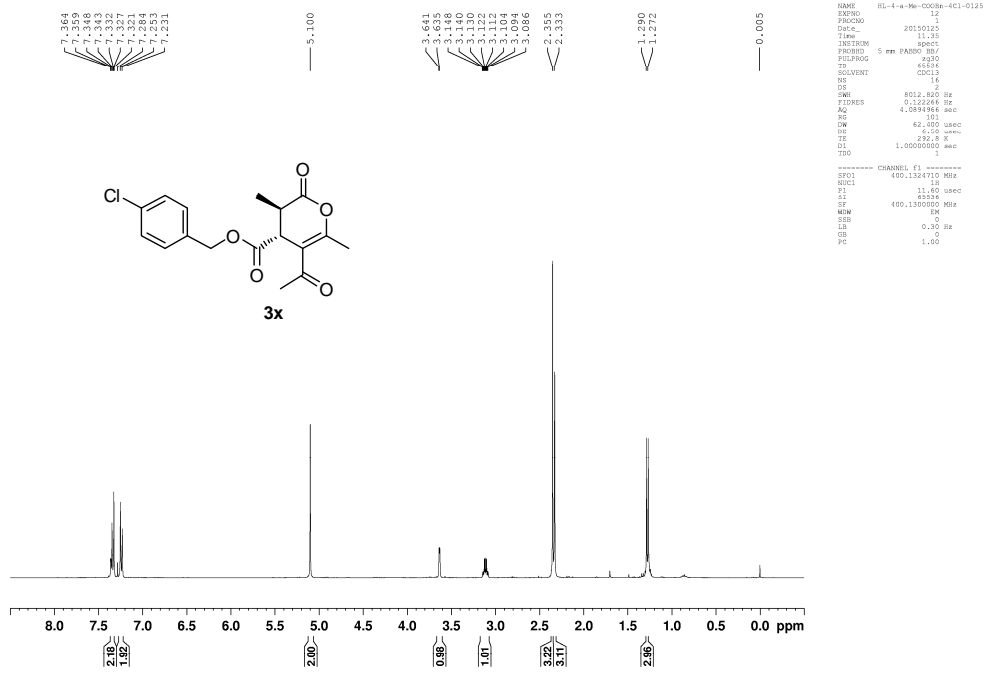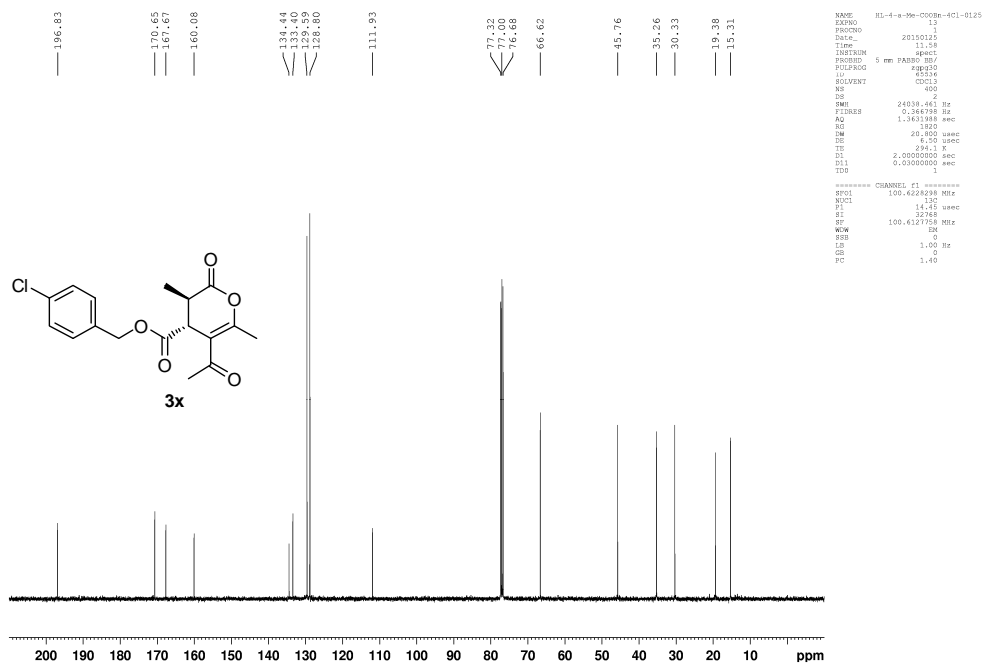

3a

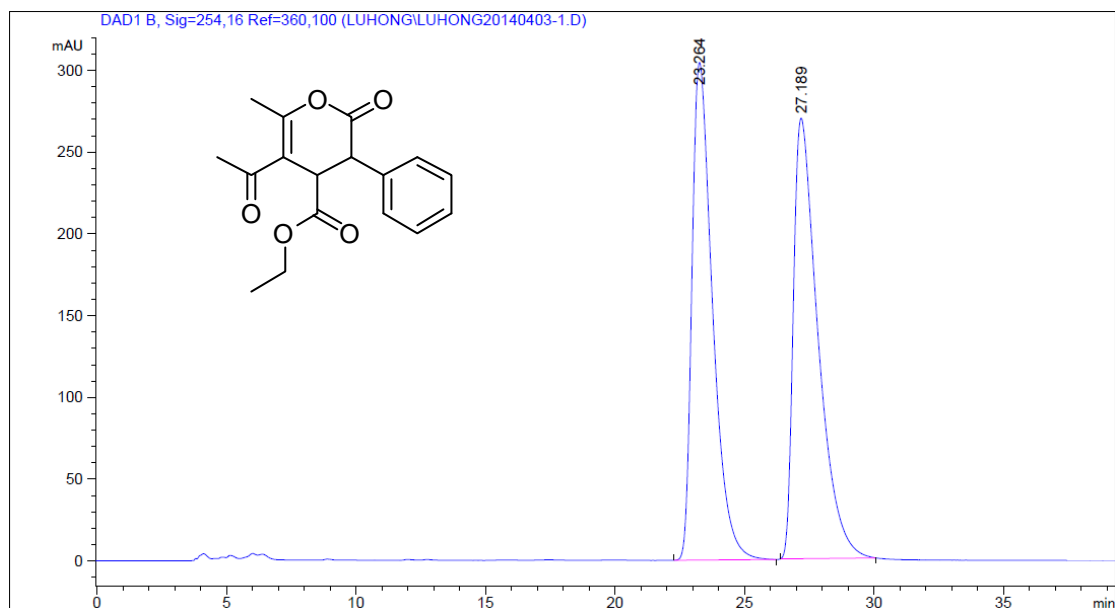

| Peak | Processed Channel | Retention Time (min) | Peak Area (mAU*s) | Peak Height (mAU) | Peak Area (%) |
|------|-------------------|----------------------|-------------------|-------------------|---------------|
| 1    | DAD 254, 16 nm    | 23.264               | 1.67971e4         | 304.28860         | 49.6592       |
| 2    | DAD 254, 16 nm    | 27.189               | 1.77228e4         | 269.36551         | 50.3408       |

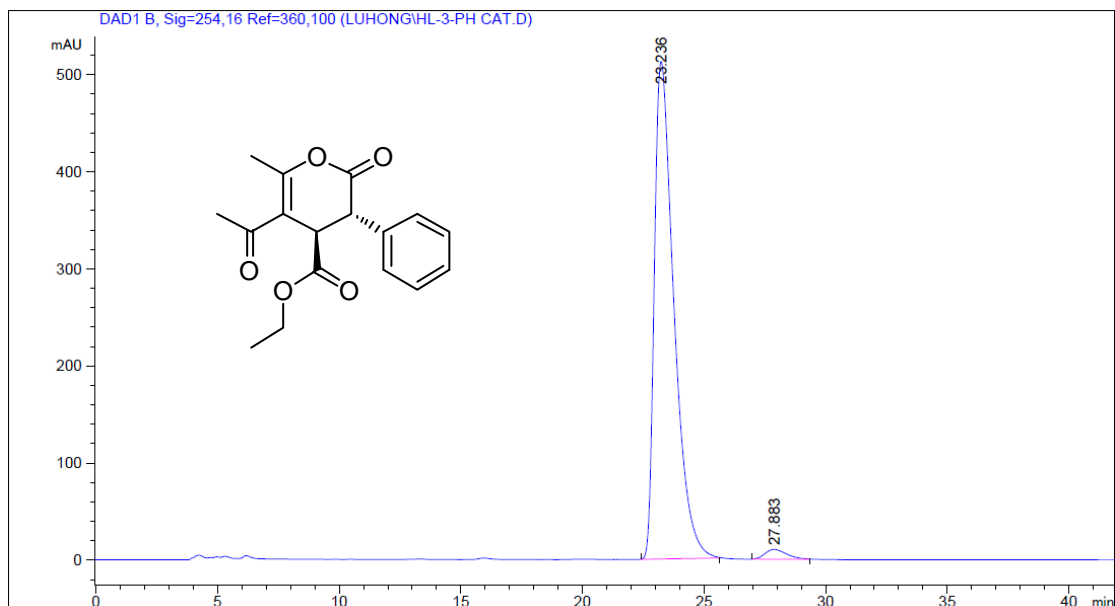

| Peak | Processed Channel | Retention Time (min) | Peak Area (mAU*s) | Peak Height (mAU) | Peak Area (%) |
|------|-------------------|----------------------|-------------------|-------------------|---------------|
| 1    | DAD 254, 16 nm    | 23.236               | 2.85998e4         | 512.54529         | 97.9166       |
| 2    | DAD 254, 16 nm    | 27.883               | 608.53680         | 9.97842           | 2.0834        |

3b

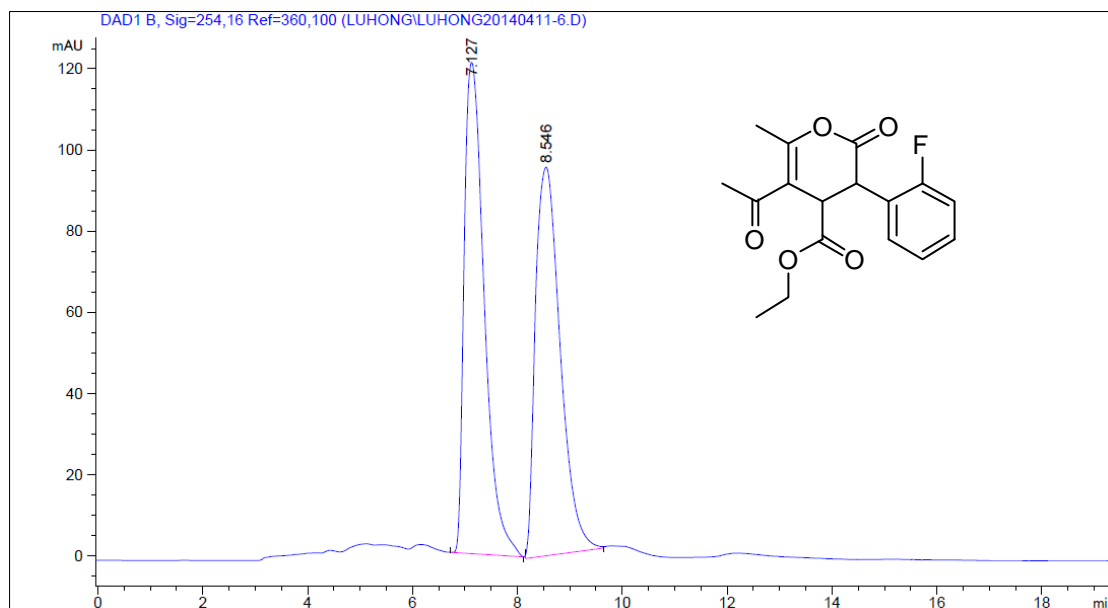

| Peak | Processed Channel | Retention Time (min) | Peak Area (mAU*s) | Peak Height (mAU) | Peak Area (%) |
|------|-------------------|----------------------|-------------------|-------------------|---------------|
| 1    | DAD 254, 16 nm    | 7.127                | 3217.05884        | 121.02797         | 50.5970       |
| 2    | DAD 254, 16 nm    | 8.546                | 3141.13696        | 95.70715          | 49.4030       |

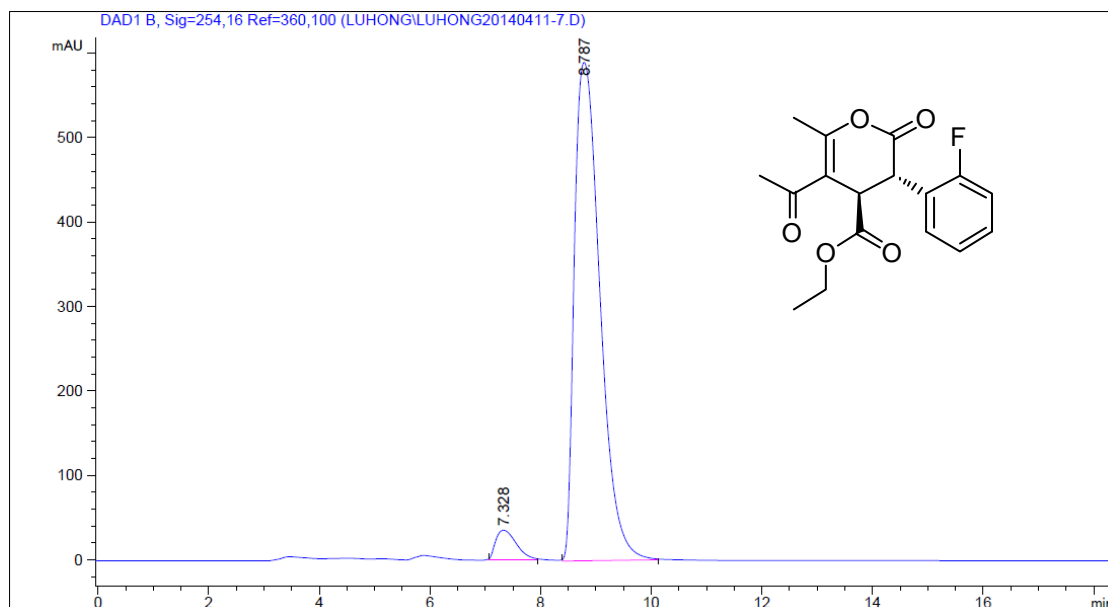

| Peak | Processed Channel | Retention Time (min) | Peak Area (mAU*s) | Peak Height (mAU) | Peak Area (%) |
|------|-------------------|----------------------|-------------------|-------------------|---------------|
| 1    | DAD 254, 16 nm    | 7.328                | 905.84814         | 34.85149          | 4.5650        |
| 2    | DAD 254, 16 nm    | 8.787                | 1.89375e4         | 590.19281         | 95.4350       |



3c

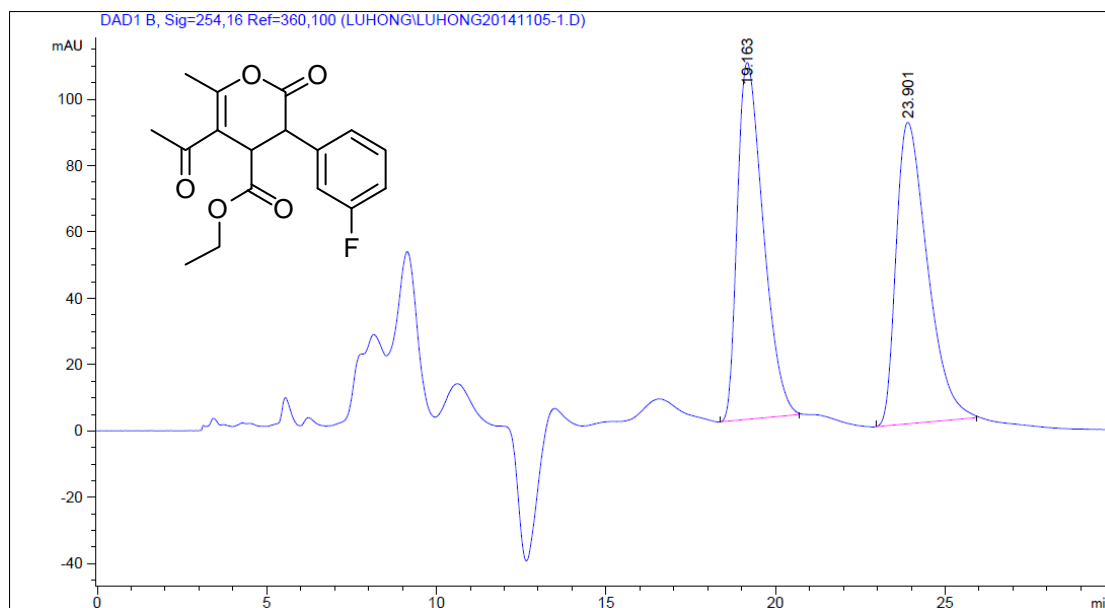

| Peak | Processed Channel | Retention Time (min) | Peak Area (mAU*s) | Peak Height (mAU) | Peak Area (%) |
|------|-------------------|----------------------|-------------------|-------------------|---------------|
| 1    | DAD 254, 16 nm    | 19.163               | 5708.45703        | 107.59546         | 49.5045       |
| 2    | DAD 254, 16 nm    | 23.901               | 5822.72803        | 90.86617          | 50.4955       |

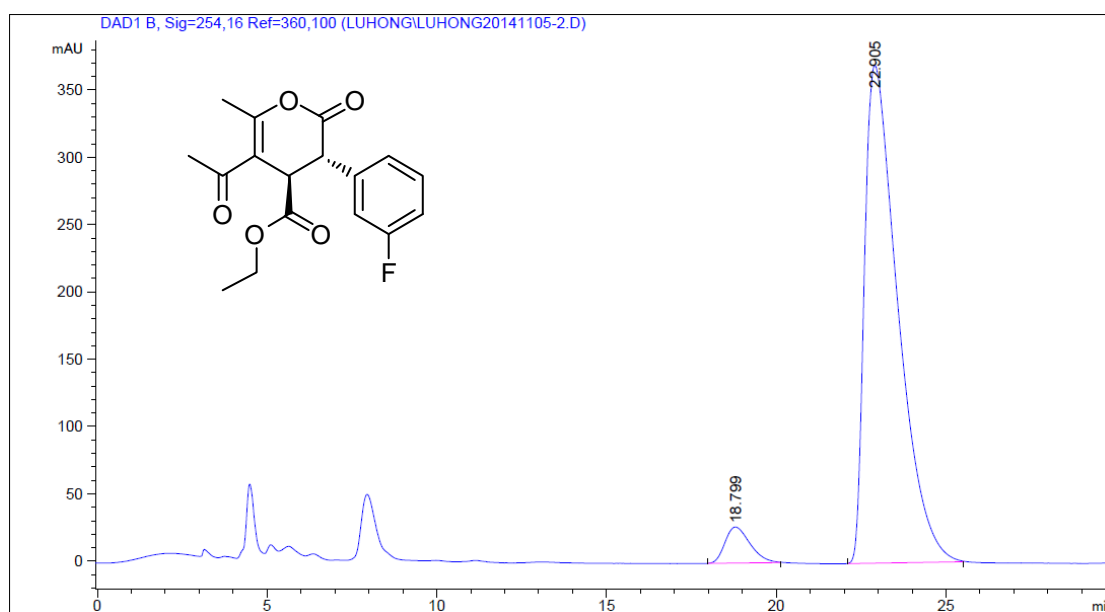

| Peak | Processed Channel | Retention Time (min) | Peak Area (mAU*s) | Peak Height (mAU) | Peak Area (%) |
|------|-------------------|----------------------|-------------------|-------------------|---------------|
| 1    | DAD 254, 16 nm    | 18.799               | 1369.08203        | 26.75384          | 5.1654        |
| 2    | DAD 254, 16 nm    | 22.905               | 2.51358e4         | 369.87375         | 94.8346       |

3d

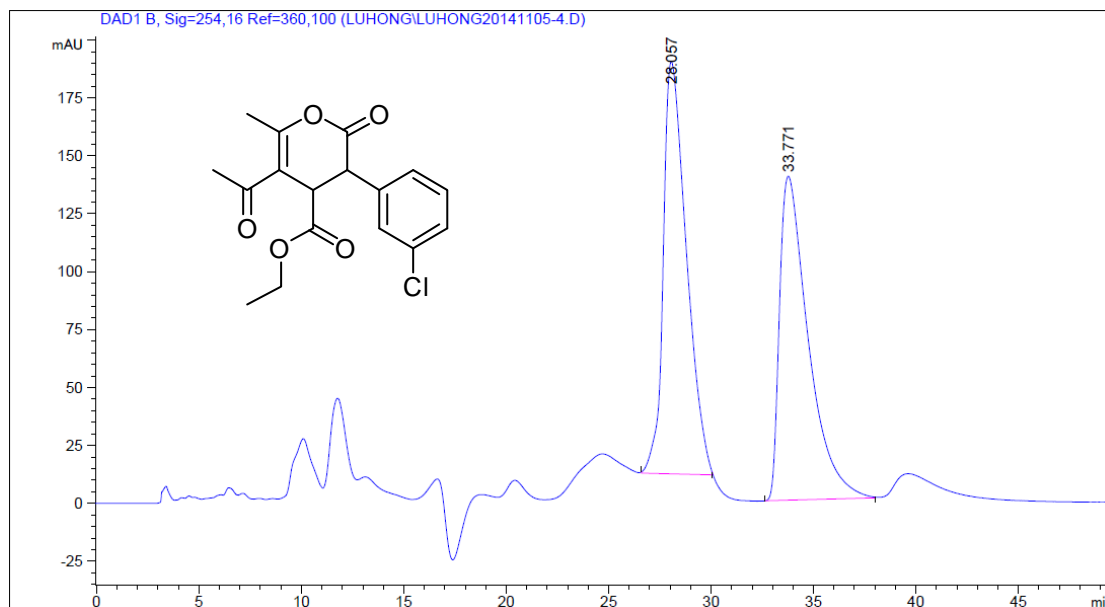

| Peak | Processed Channel | Retention Time (min) | Peak Area (mAU*s) | Peak Height (mAU) | Peak Area (%) |
|------|-------------------|----------------------|-------------------|-------------------|---------------|
| 1    | DAD 254, 16 nm    | 28.057               | 1.39738e4         | 178.06345         | 50.6433       |
| 2    | DAD 254, 16 nm    | 33.771               | 1.36187e4         | 139.83339         | 49.3567       |

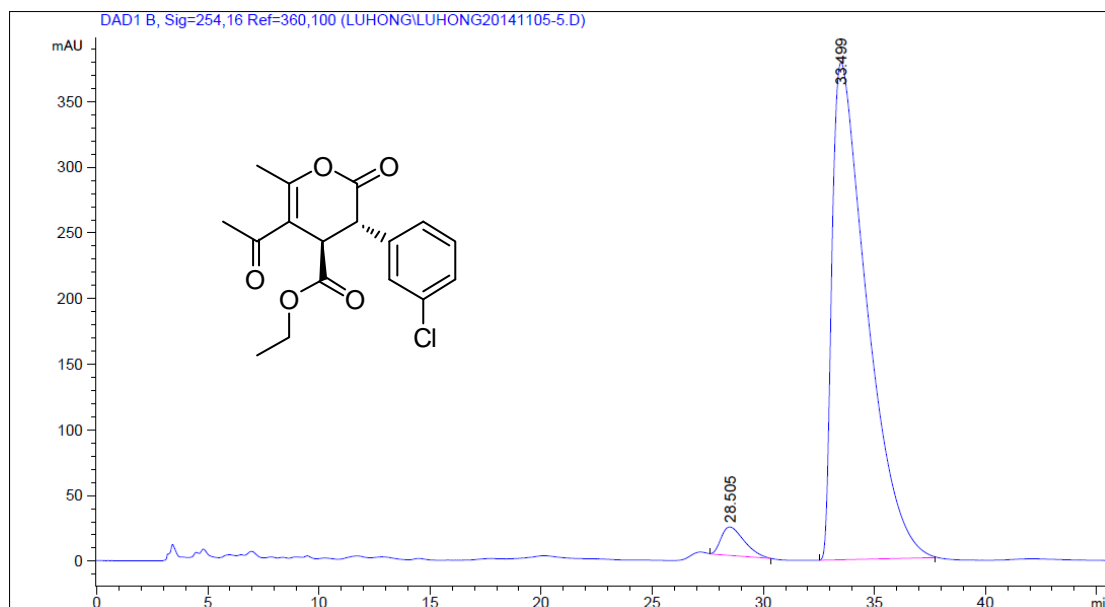

| Peak | Processed Channel | Retention Time (min) | Peak Area (mAU*s) | Peak Height (mAU) | Peak Area (%) |
|------|-------------------|----------------------|-------------------|-------------------|---------------|
| 1    | DAD 254, 16 nm    | 28.505               | 1565.34631        | 21.65634          | 3.6695        |
| 2    | DAD 254, 16 nm    | 33.499               | 4.10933e4         | 378.78516         | 96.3305       |

3e

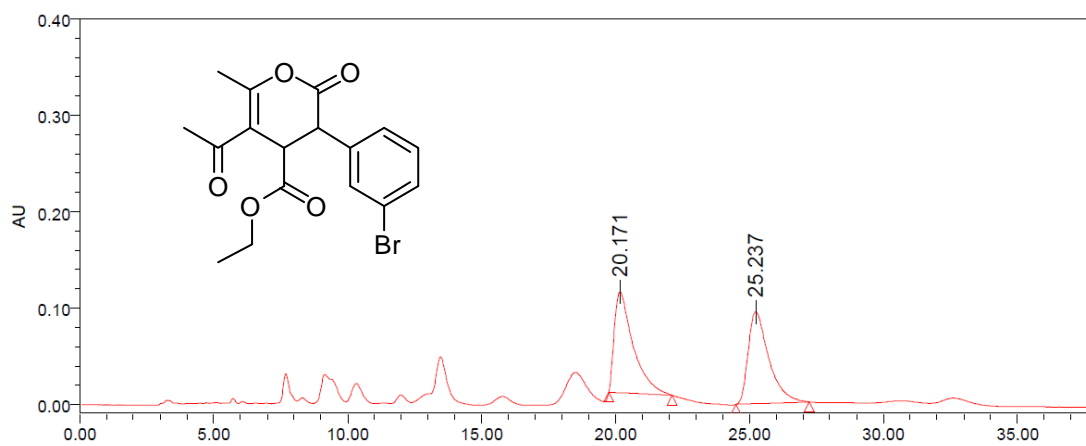

| Peak | Processed Channel | Retention Time (min) | Peak Area (mAU*s) | Peak Height (mAU) | Peak Area (%) |
|------|-------------------|----------------------|-------------------|-------------------|---------------|
| 1    | PDA254 nm         | 20.171               | 5129799           | 104702            | 50.13         |
| 2    | PDA 254nm         | 25.237               | 5102963           | 95283             | 49.87         |

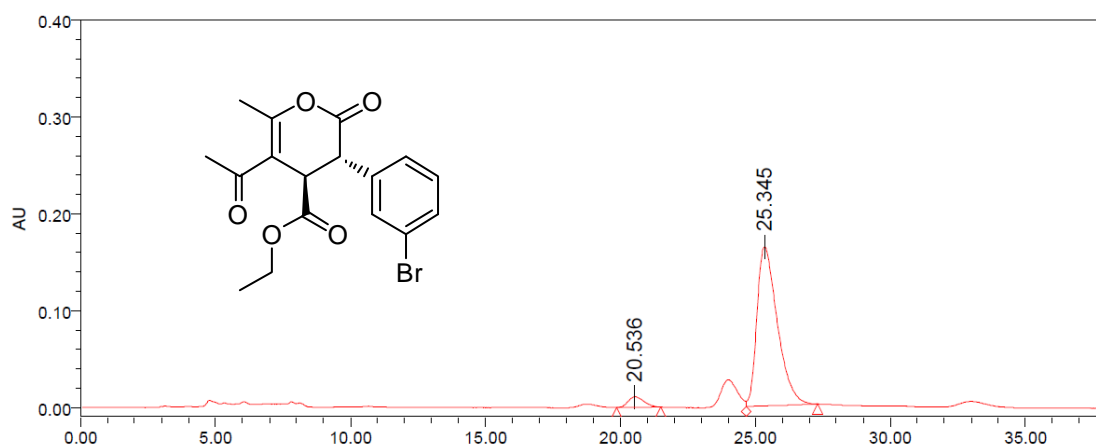

| Peak | Processed Channel | Retention Time (min) | Peak Area (AU*s) | Peak Height (AU) | Peak Area (%) |
|------|-------------------|----------------------|------------------|------------------|---------------|
| 1    | PDA254 nm         | 20.536               | 453859           | 10968            | 5.00          |
| 2    | PDA254 nm         | 25.345               | 8625663          | 164280           | 95.00         |

3f

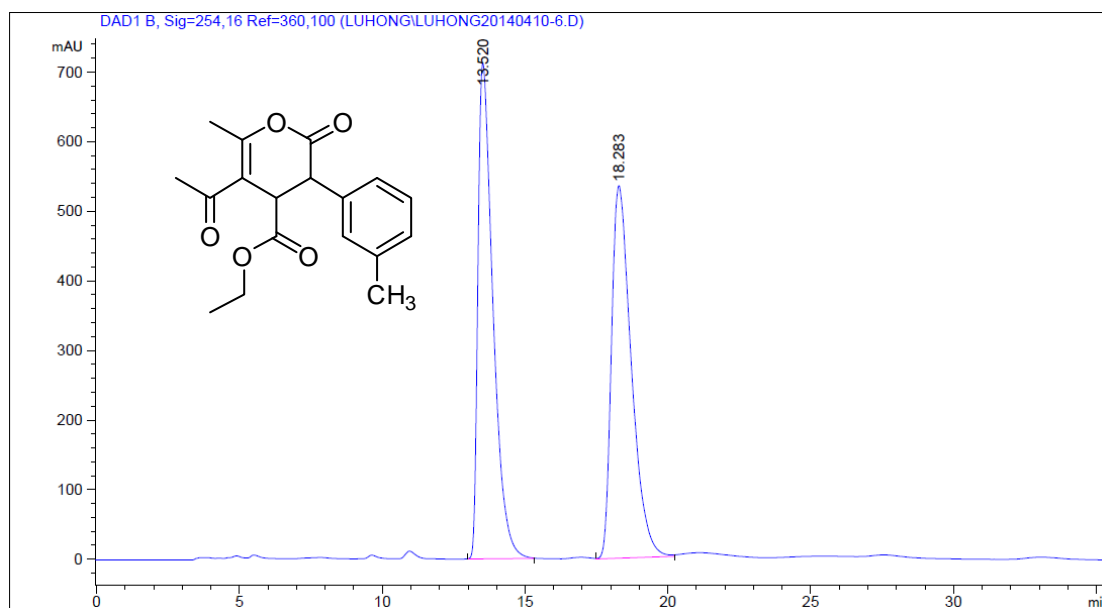

| Peak | Processed Channel | Retention Time (min) | Peak Area (mAU*s) | Peak Height (mAU) | Peak Area (%) |
|------|-------------------|----------------------|-------------------|-------------------|---------------|
| 1    | DAD 254, 16 nm    | 13.520               | 2.60074e4         | 712.30029         | 50.1697       |
| 2    | DAD 254, 16 nm    | 18.283               | 2.58315e4         | 535.31207         | 49.8303       |

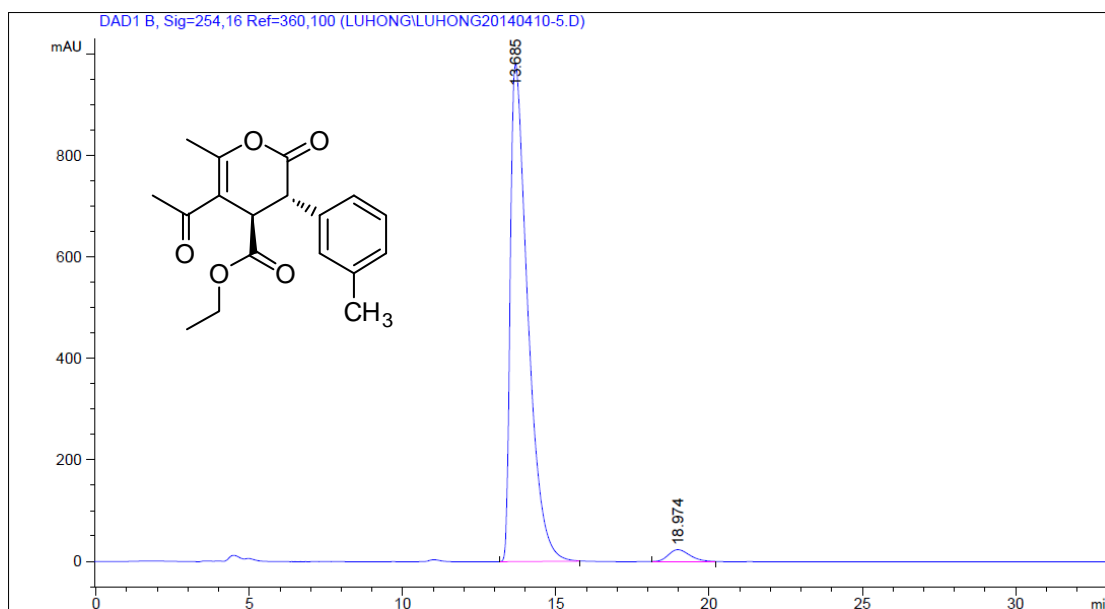

| Peak | Processed Channel | Retention Time (min) | Peak Area (mAU*s) | Peak Height (mAU) | Peak Area (%) |
|------|-------------------|----------------------|-------------------|-------------------|---------------|
| 1    | DAD 254, 16 nm    | 13.685               | 3.87218e4         | 982.26636         | 97.1668       |
| 2    | DAD 254, 16 nm    | 18.974               | 1129.05334        | 23.39927          | 2.8332        |

3g

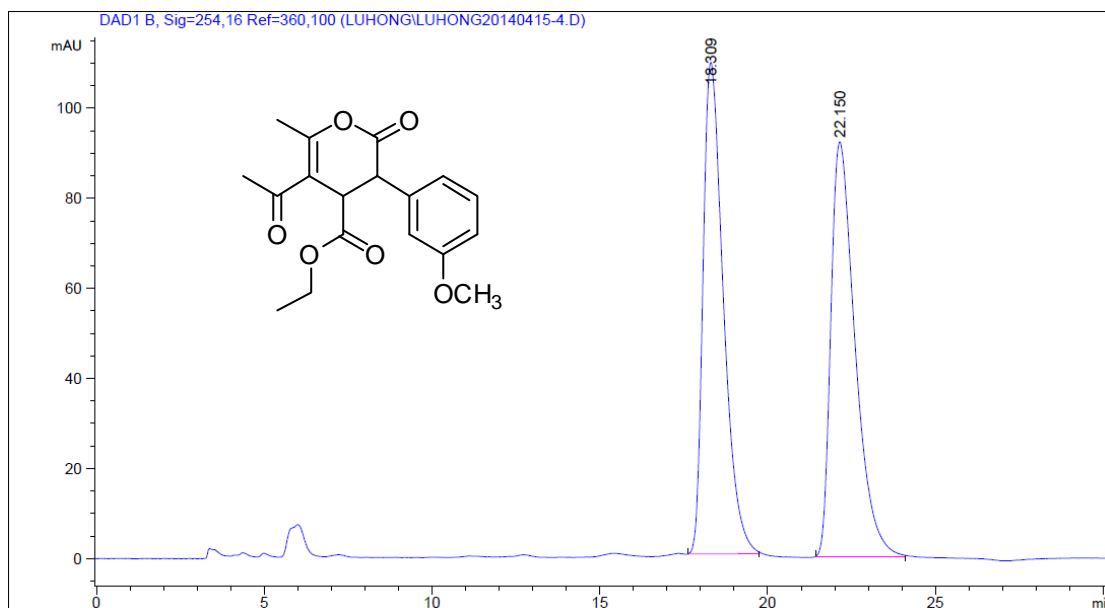

| Peak | Processed Channel | Retention Time (min) | Peak Area (mAU*s) | Peak Height (mAU) | Peak Area (%) |
|------|-------------------|----------------------|-------------------|-------------------|---------------|
| 1    | DAD 254, 16 nm    | 18.309               | 4591.86377        | 109.14375         | 49.7706       |
| 2    | DAD 254, 16 nm    | 22.150               | 4634.18506        | 92.21734          | 50.2294       |

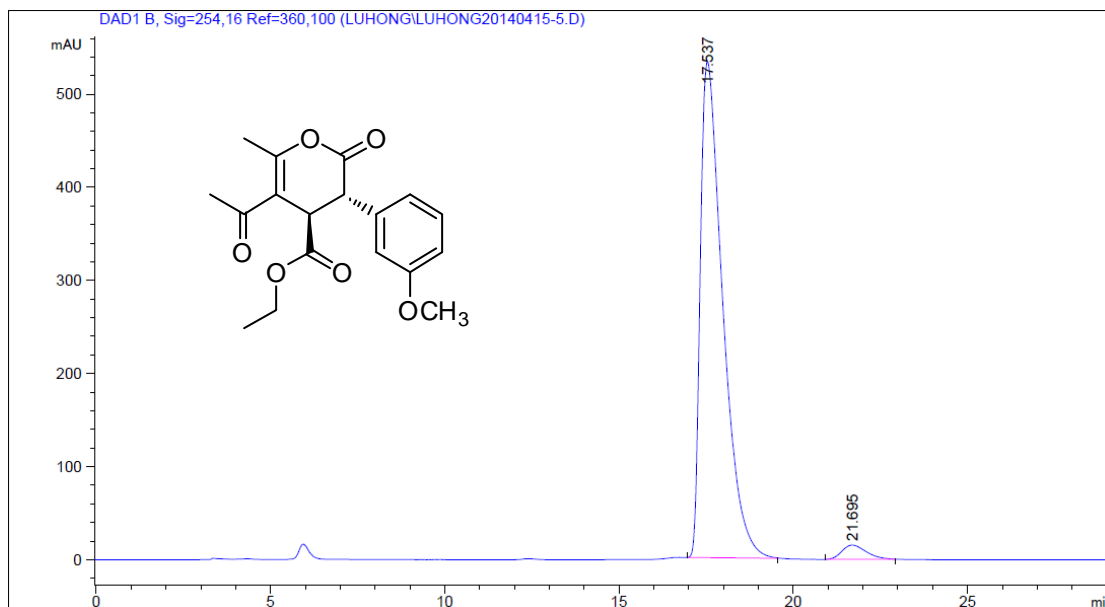

| Peak | Processed Channel | Retention Time (min) | Peak Area (mAU*s) | Peak Height (mAU) | Peak Area (%) |
|------|-------------------|----------------------|-------------------|-------------------|---------------|
| 1    | DAD 254, 16 nm    | 17.537               | 2.37991e4         | 533.15991         | 96.9647       |
| 2    | DAD 254, 16 nm    | 21.695               | 744.98730         | 15.36586          | 3.0353        |

3h

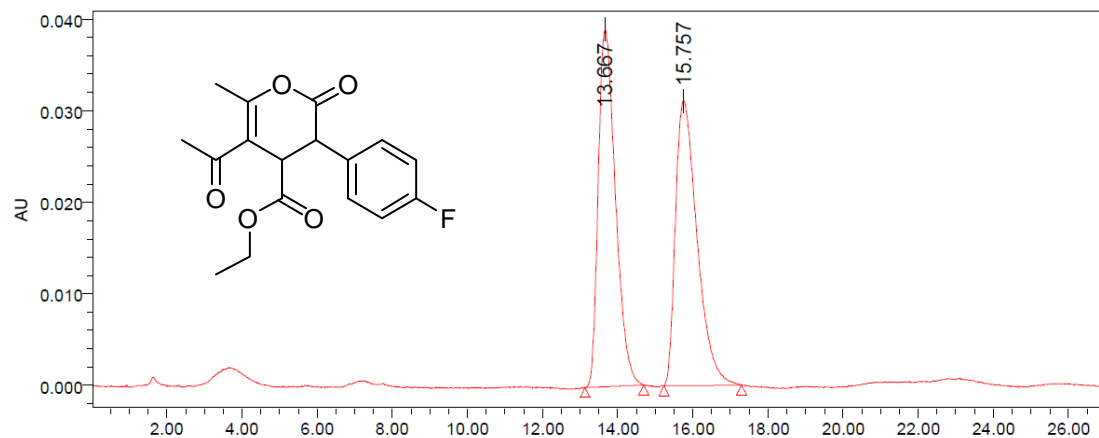

| Peak | Processed Channel | Retention Time (min) | Peak Area (AU*s) | Peak Height (AU) | Peak Area (%) |
|------|-------------------|----------------------|------------------|------------------|---------------|
| 1    | PDA246.9 nm       | 13.667               | 1240049          | 39046            | 49.90         |
| 2    | PDA246.9 nm       | 15.757               | 1245039          | 31146            | 50.10         |

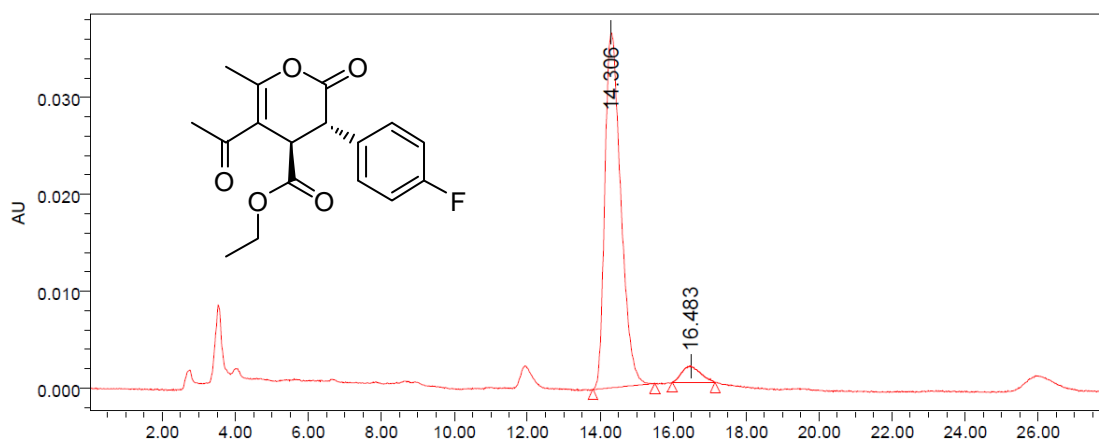

| Peak | Processed Channel | Retention Time (min) | Peak Area (AU*s) | Peak Height (AU) | Peak Area (%) |
|------|-------------------|----------------------|------------------|------------------|---------------|
| 1    | PDA246.9 nm       | 14.306               | 1109875          | 36656            | 94.95         |
| 2    | PDA246.9 nm       | 16.483               | 58971            | 1670             | 5.05          |

3i

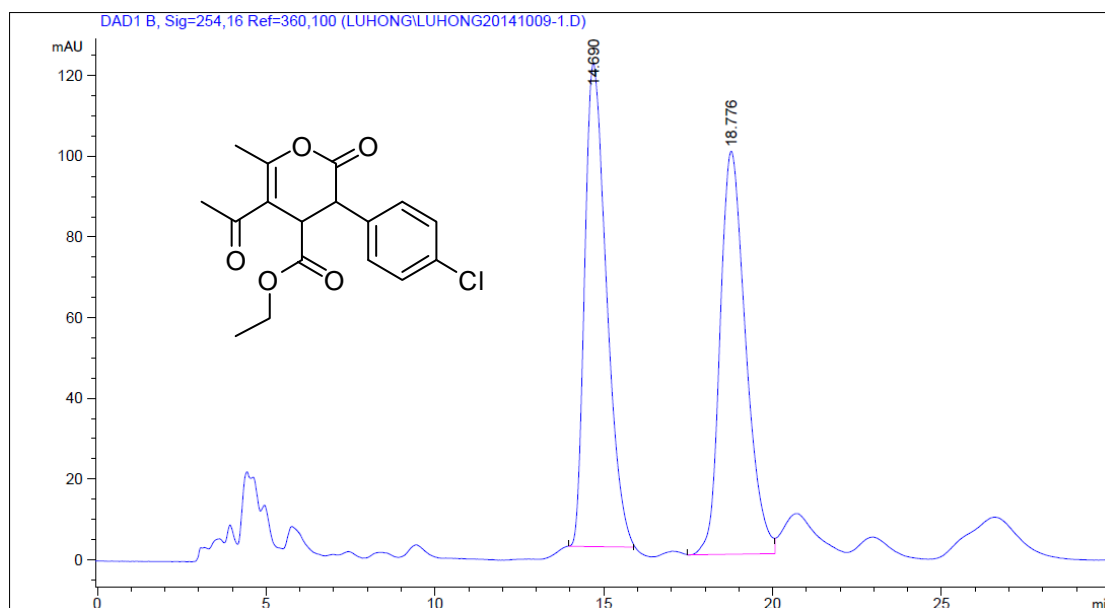

| Peak | Processed Channel | Retention Time (min) | Peak Area (mAU*s) | Peak Height (mAU) | Peak Area (%) |
|------|-------------------|----------------------|-------------------|-------------------|---------------|
| 1    | DAD 254, 16 nm    | 14.690               | 5360.80029        | 119.75430         | 50.4051       |
| 2    | DAD 254, 16 nm    | 18.776               | 5274.63818        | 99.87841          | 49.5949       |

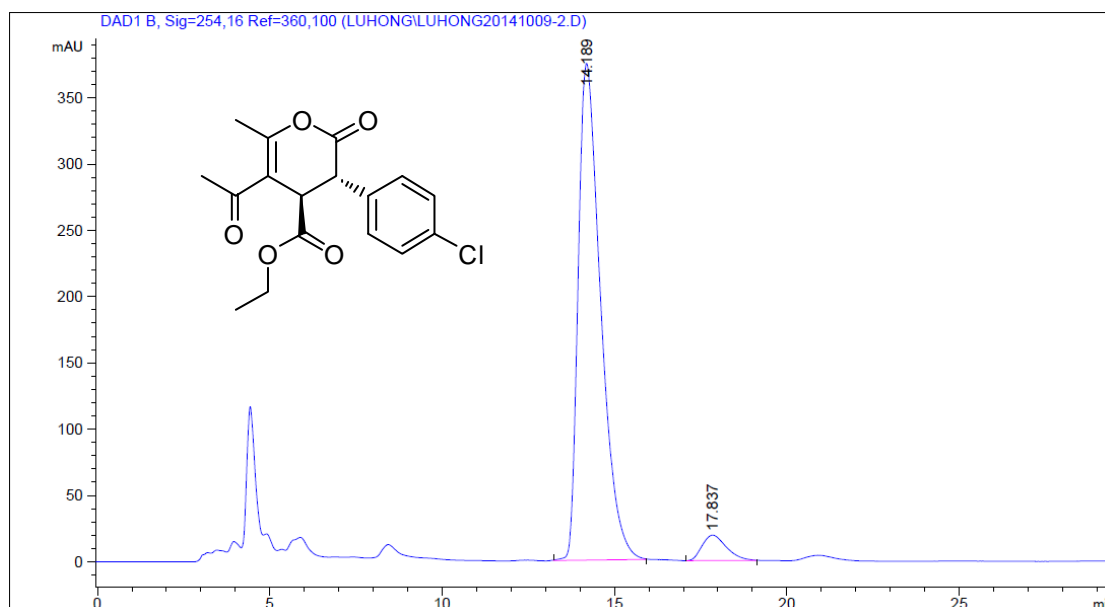

| Peak | Processed Channel | Retention Time (min) | Peak Area (mAU*s) | Peak Height (mAU) | Peak Area (%) |
|------|-------------------|----------------------|-------------------|-------------------|---------------|
| 1    | DAD 254, 16 nm    | 14.189               | 1.69883e4         | 374.87115         | 94.7678       |
| 2    | DAD 254, 16 nm    | 17.837               | 937.93311         | 19.23451          | 5.2322        |

3j

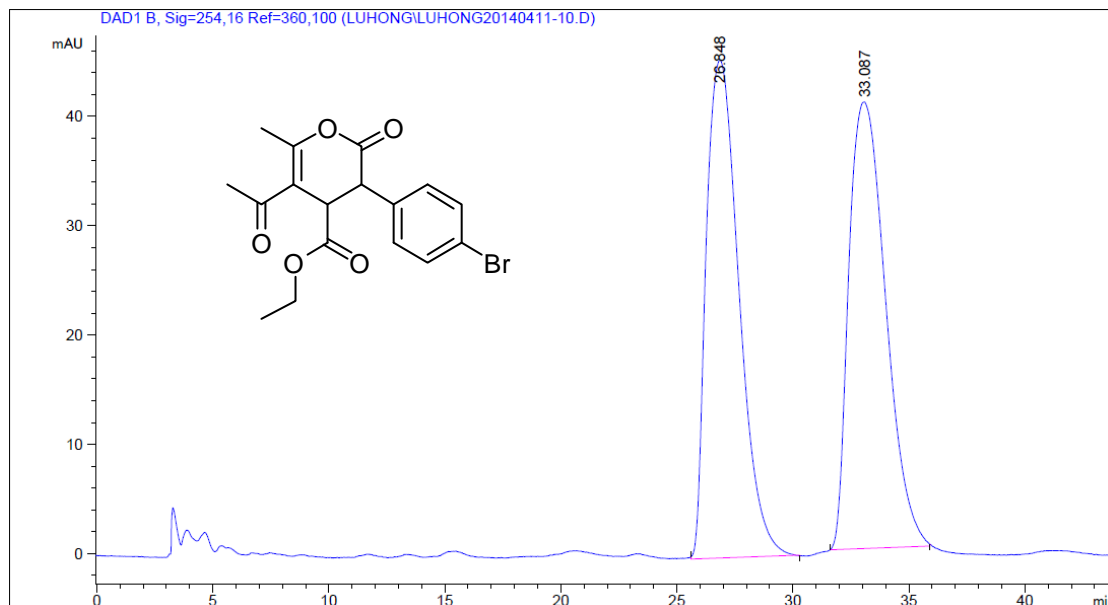

| Peak | Processed Channel | Retention Time (min) | Peak Area (mAU*s) | Peak Height (mAU) | Peak Area (%) |
|------|-------------------|----------------------|-------------------|-------------------|---------------|
| 1    | DAD 254, 16 nm    | 26.848               | 4462.83496        | 45.53188          | 49.7318       |
| 2    | DAD 254, 16 nm    | 33.087               | 4510.97314        | 40.85940          | 50.2682       |

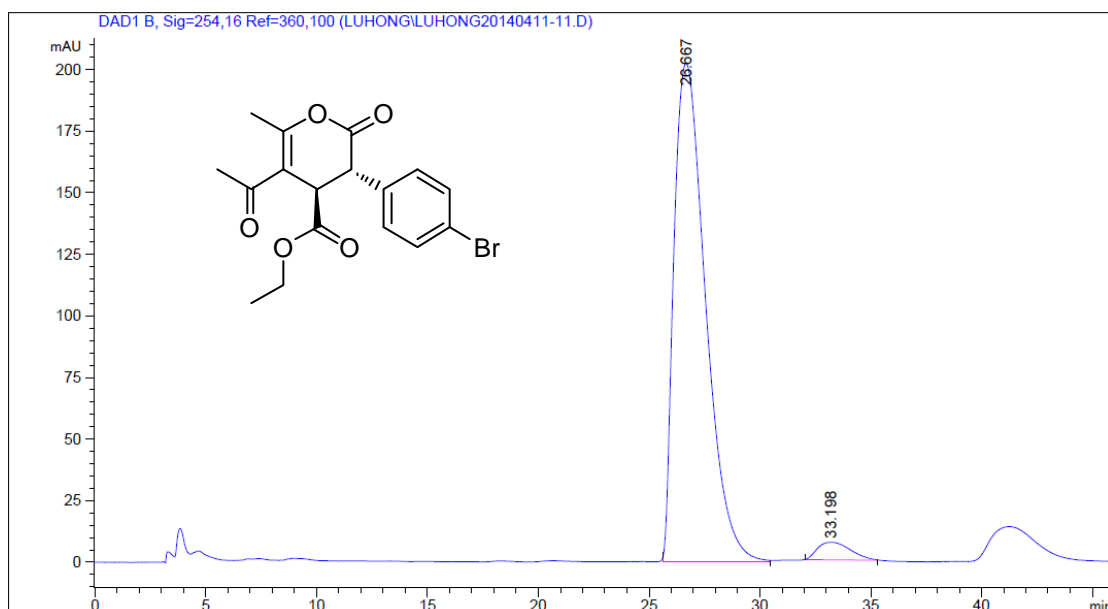

| Peak | Processed Channel | Retention Time (min) | Peak Area (mAU*s) | Peak Height (mAU) | Peak Area (%) |
|------|-------------------|----------------------|-------------------|-------------------|---------------|
| 1    | DAD 254, 16 nm    | 26.667               | 1.99684e4         | 202.37297         | 96.4331       |
| 2    | DAD 254, 16 nm    | 33.198               | 738.58948         | 7.13121           | 3.5669        |



3k

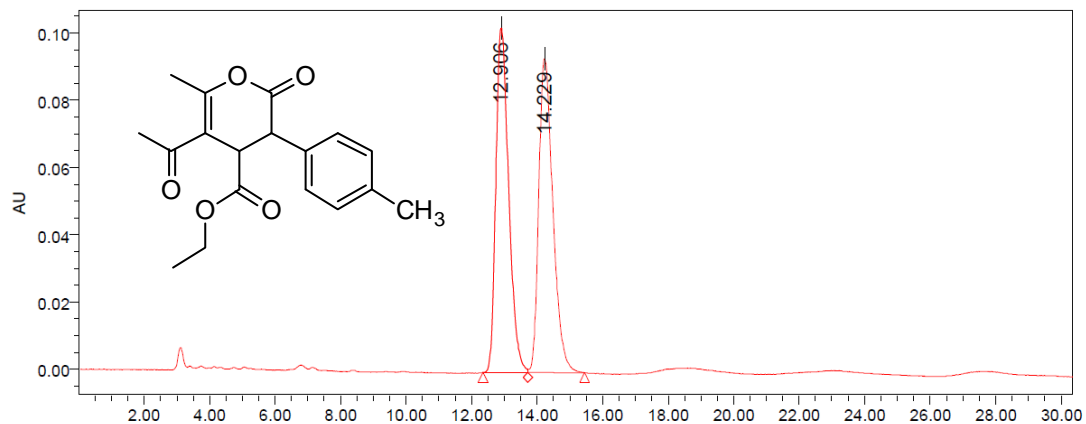

| Peak | Processed Channel | Retention Time (min) | Peak Area (AU*s) | Peak Height (AU) | Peak Area (%) |
|------|-------------------|----------------------|------------------|------------------|---------------|
| 1    | PDA246.9 nm       | 12.906               | 2790713          | 102444           | 49.88         |
| 2    | PDA246.9 nm       | 14.229               | 2803883          | 93367            | 50.12         |

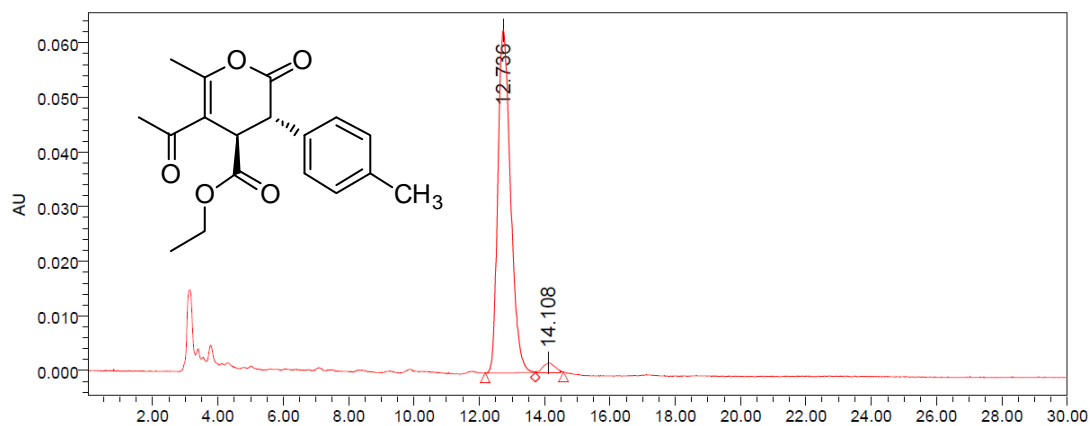

| Peak | Processed Channel | Retention Time (min) | Peak Area (AU*s) | Peak Height (AU) | Peak Area (%) |
|------|-------------------|----------------------|------------------|------------------|---------------|
| 1    | PDA246.9 nm       | 12.736               | 1690588          | 62738            | 97.49         |
| 2    | PDA246.9 nm       | 14.108               | 43514            | 1731             | 2.51          |

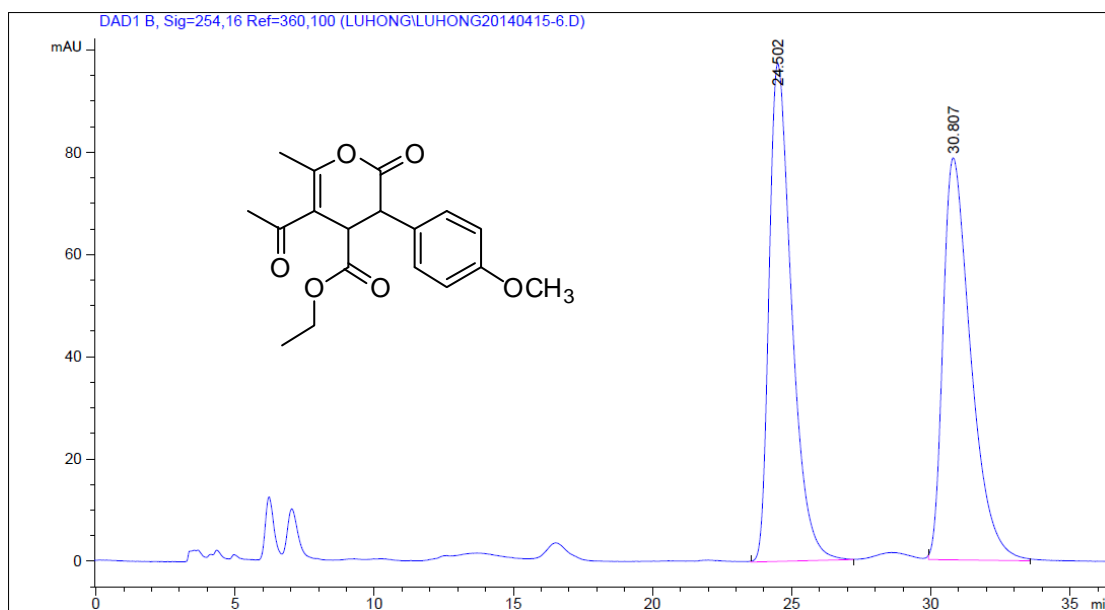

| Peak | Processed Channel | Retention Time (min) | Peak Area (mAU*s) | Peak Height (mAU) | Peak Area (%) |
|------|-------------------|----------------------|-------------------|-------------------|---------------|
| 1    | DAD 254, 16 nm    | 24.502               | 5495.23730        | 97.43780          | 50.1952       |
| 2    | DAD 254, 16 nm    | 30.807               | 5452.49951        | 78.66367          | 49.8048       |

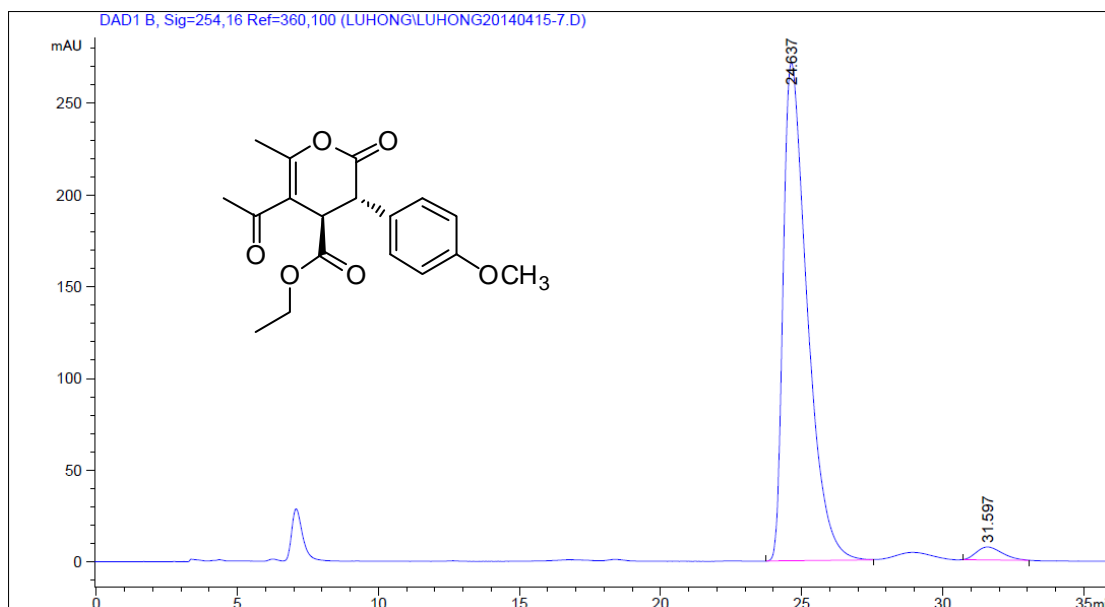

| Peak | Processed Channel | Retention Time (min) | Peak Area (mAU*s) | Peak Height (mAU) | Peak Area (%) |
|------|-------------------|----------------------|-------------------|-------------------|---------------|
| 1    | DAD 254, 16 nm    | 24.637               | 1.60160e4         | 271.59885         | 97.2659       |
| 2    | DAD 254, 16 nm    | 31.597               | 450.20514         | 7.07779           | 2.7341        |

3m

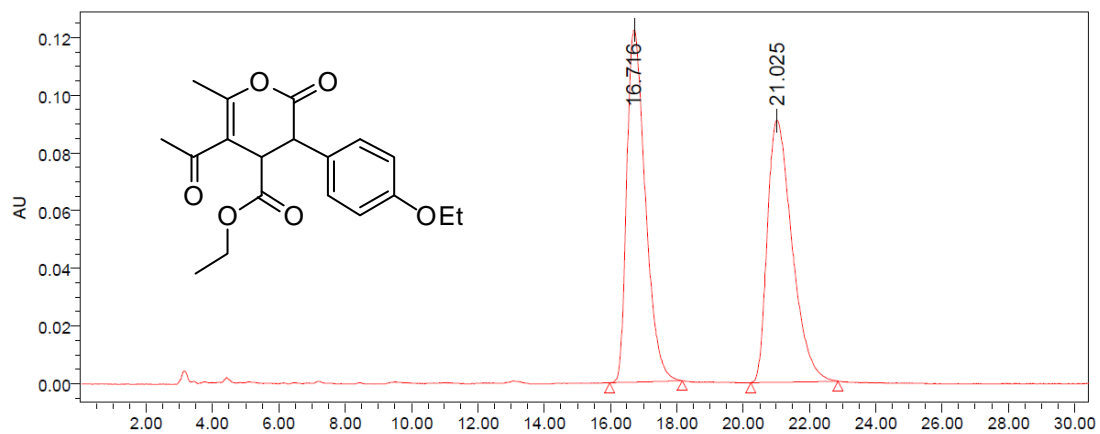

| Peak | Processed Channel | Retention Time (min) | Peak Area (AU*s) | Peak Height (AU) | Peak Area (%) |
|------|-------------------|----------------------|------------------|------------------|---------------|
| 1    | PDA246.9 nm       | 16.716               | 4743145          | 122087           | 50.19         |
| 2    | PDA246.9 nm       | 21.025               | 4707496          | 90775            | 49.81         |

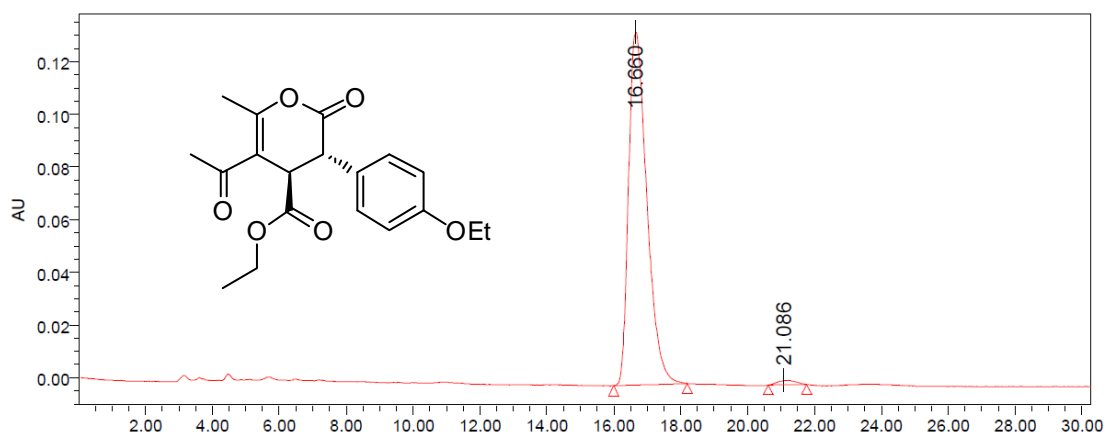

| Peak | Processed Channel | Retention Time (min) | Peak Area (AU*s) | Peak Height (AU) | Peak Area (%) |
|------|-------------------|----------------------|------------------|------------------|---------------|
| 1    | PDA246.9 nm       | 16.660               | 5088941          | 134227           | 98.77         |
| 2    | PDA246.9 nm       | 21.086               | 63474            | 1641             | 1.23          |

3n

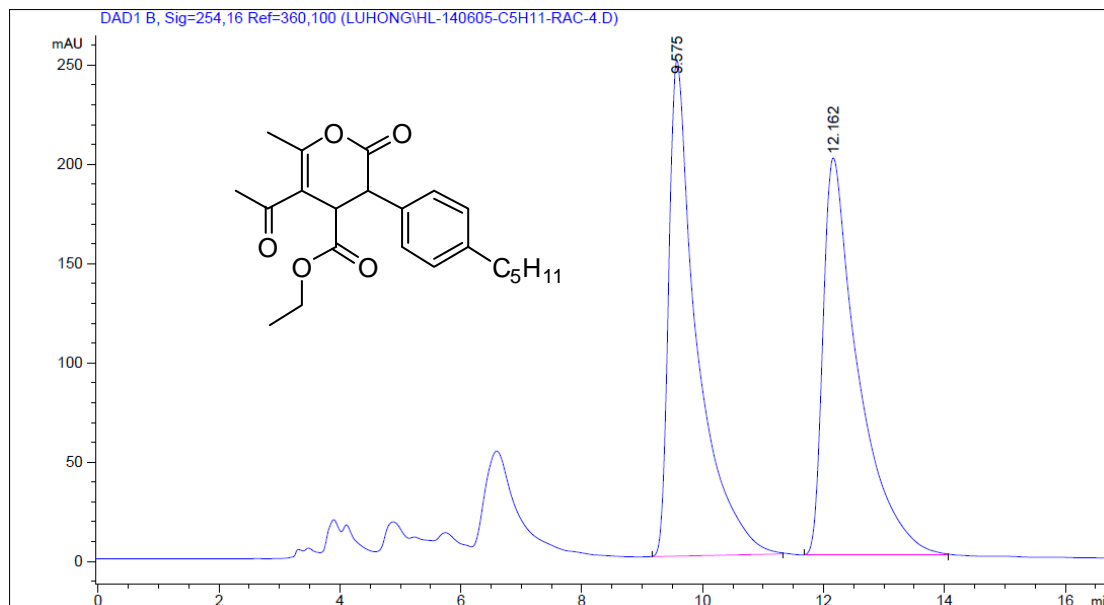

| Peak | Processed Channel | Retention Time (min) | Peak Area (mAU*s) | Peak Height (mAU) | Peak Area (%) |
|------|-------------------|----------------------|-------------------|-------------------|---------------|
| 1    | DAD 254, 16 nm    | 9.575                | 8085.87207        | 249.60936         | 50.1708       |
| 2    | DAD 254, 16 nm    | 12.162               | 8030.80518        | 199.89389         | 49.8292       |

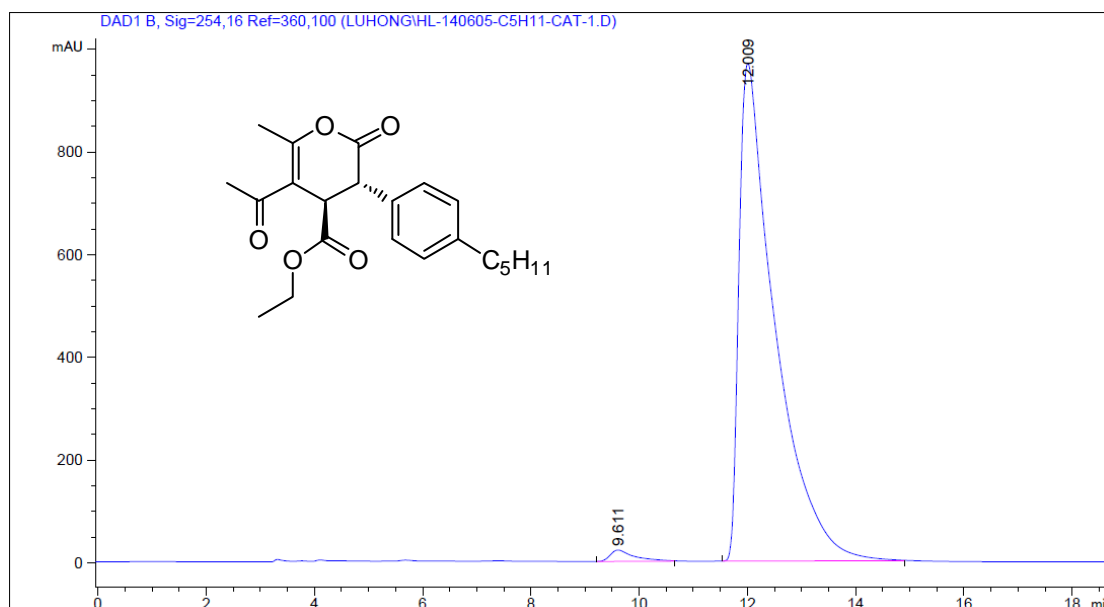

| Peak | Processed Channel | Retention Time (min) | Peak Area (mAU*s) | Peak Height (mAU) | Peak Area (%) |
|------|-------------------|----------------------|-------------------|-------------------|---------------|
| 1    | DAD 254, 16 nm    | 9.611                | 682.96936         | 22.1537           | 1.5015        |
| 2    | DAD 254, 16 nm    | 12.009               | 4.48028e4         | 969.76141         | 98.4985       |

30

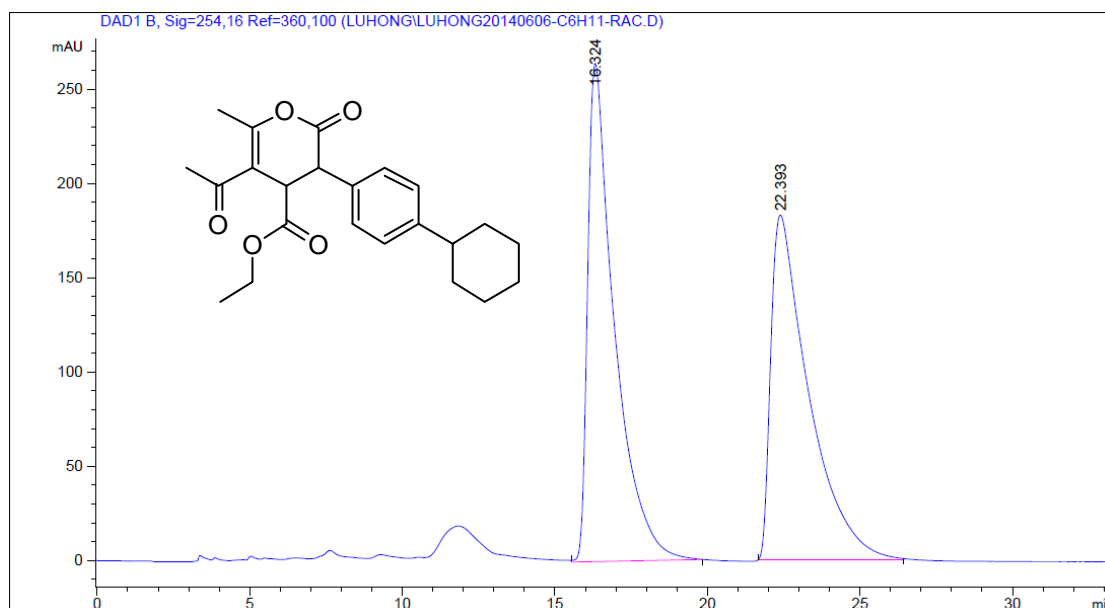

| Peak | Processed Channel | Retention Time (min) | Peak Area (mAU*s) | Peak Height (mAU) | Peak Area (%) |
|------|-------------------|----------------------|-------------------|-------------------|---------------|
| 1    | DAD 254, 16 nm    | 16.324               | 1.60939e4         | 264.19598         | 50.5960       |
| 2    | DAD 254, 16 nm    | 22.393               | 1.57148e4         | 182.63591         | 49.4040       |

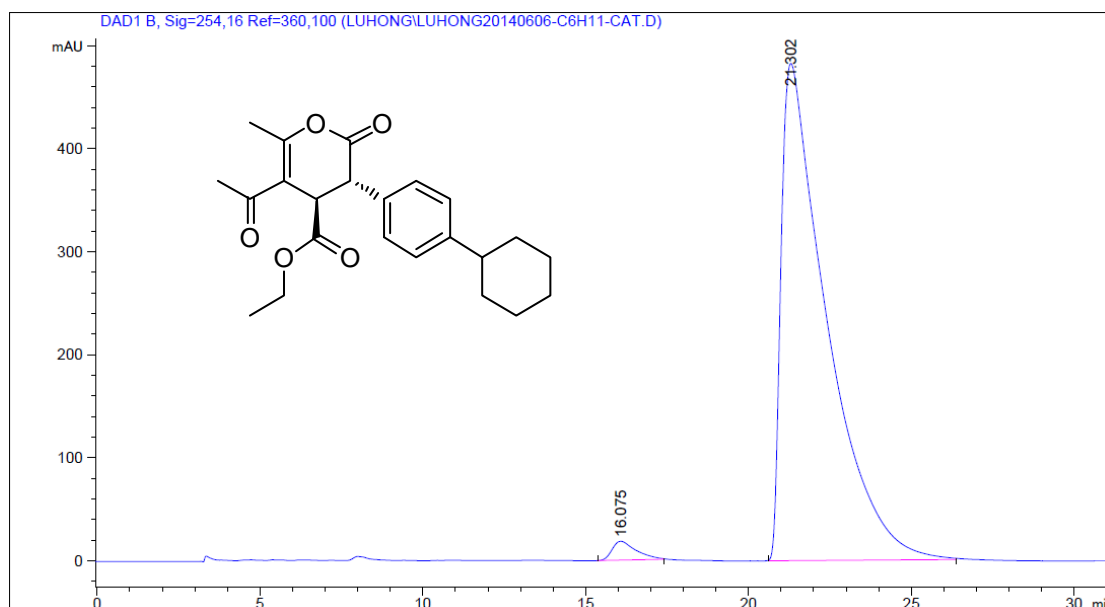

| Peak | Processed Channel | Retention Time (min) | Peak Area (mAU*s) | Peak Height (mAU) | Peak Area (%) |
|------|-------------------|----------------------|-------------------|-------------------|---------------|
| 1    | DAD 254, 16 nm    | 16.075               | 935.47333         | 18.44045          | 1.9669        |
| 2    | DAD 254, 16 nm    | 21.302               | 4.66265e4         | 482.55835         | 98.0331       |

3p

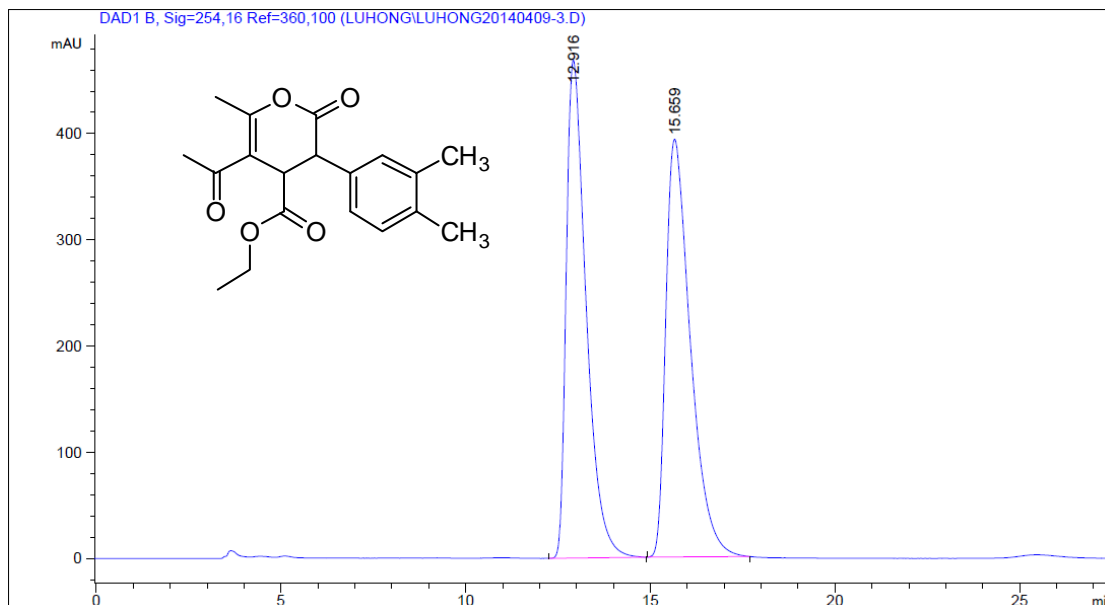

| Peak | Processed Channel | Retention Time (min) | Peak Area (mAU*s) | Peak Height (mAU) | Peak Area (%) |
|------|-------------------|----------------------|-------------------|-------------------|---------------|
| 1    | DAD 254, 16 nm    | 12.916               | 1.75131e4         | 468.87976         | 49.0660       |
| 2    | DAD 254, 16 nm    | 15.659               | 1.81799e4         | 393.25751         | 50.9340       |

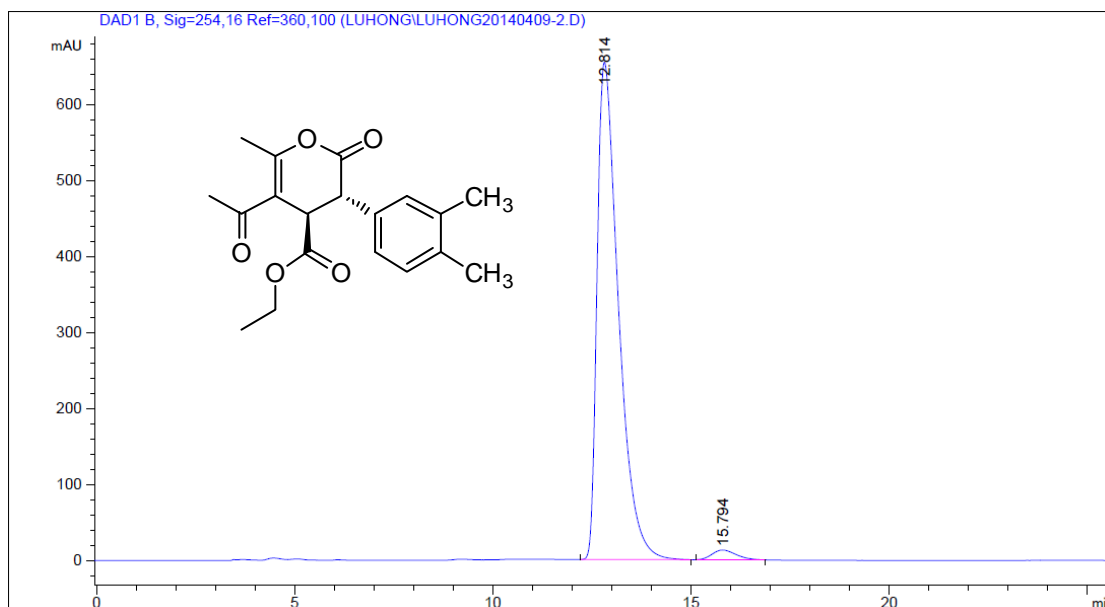

| Peak | Processed Channel | Retention Time (min) | Peak Area (mAU*s) | Peak Height (mAU) | Peak Area (%) |
|------|-------------------|----------------------|-------------------|-------------------|---------------|
| 1    | DAD 254, 16 nm    | 12.814               | 2.44865e4         | 654.27258         | 97.8444       |
| 2    | DAD 254, 16 nm    | 15.794               | 539.47058         | 12.76532          | 2.1556        |

3q

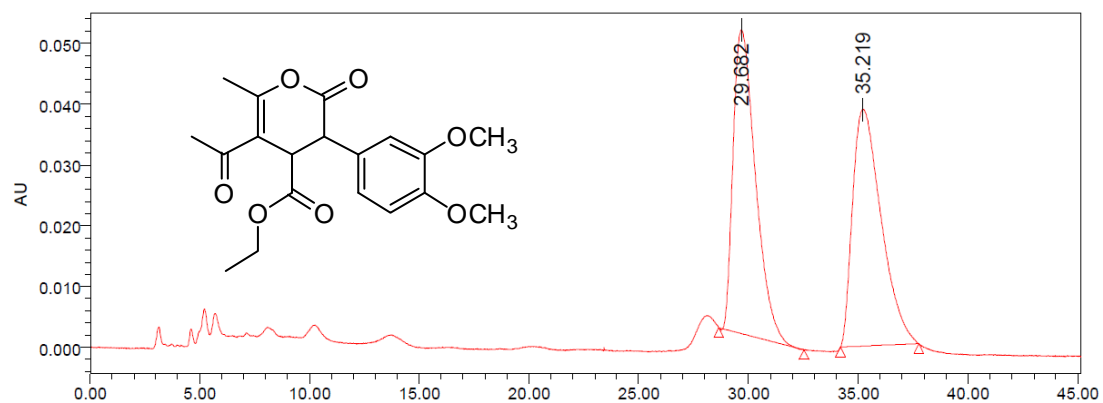

| Peak | Processed Channel | Retention Time (min) | Peak Area (AU*s) | Peak Height (AU) | Peak Area (%) |
|------|-------------------|----------------------|------------------|------------------|---------------|
| 1    | PDA246.9 nm       | 29.682               | 3540273          | 49972            | 50.03         |
| 2    | PDA246.9 nm       | 35.219               | 3535808          | 38939            | 49.97         |

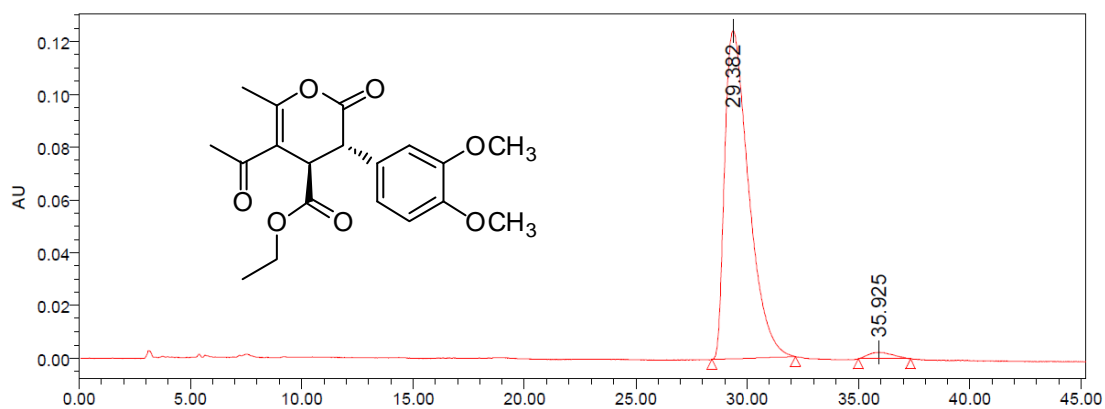

| Peak | Processed Channel | Retention Time (min) | Peak Area (AU*s) | Peak Height (AU) | Peak Area (%) |
|------|-------------------|----------------------|------------------|------------------|---------------|
| 1    | PDA246.9 nm       | 29.382               | 9339267          | 124412           | 97.96         |
| 2    | PDA246.9 nm       | 35.925               | 194163           | 2466             | 2.04          |

3r

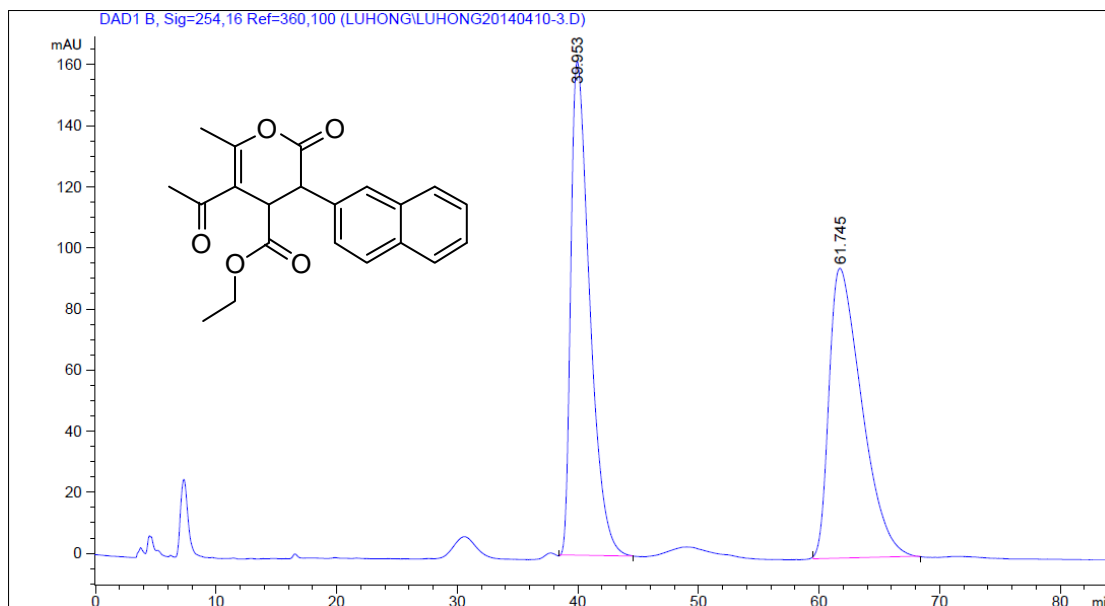

| Peak | Processed Channel | Retention Time (min) | Peak Area (mAU*s) | Peak Height (mAU) | Peak Area (%) |
|------|-------------------|----------------------|-------------------|-------------------|---------------|
| 1    | DAD 254, 16 nm    | 39.953               | 1.75848e4         | 161.70930         | 49.6348       |
| 2    | DAD 254, 16 nm    | 61.745               | 1.78436e4         | 94.90437          | 50.3652       |

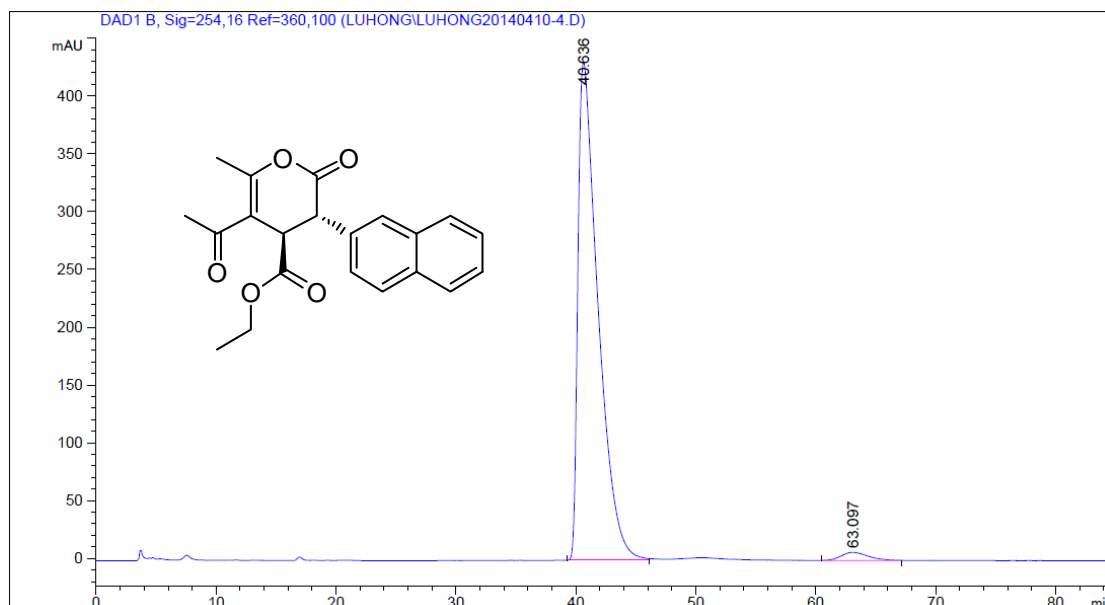

| Peak | Processed Channel | Retention Time (min) | Peak Area (mAU*s) | Peak Height (mAU) | Peak Area (%) |
|------|-------------------|----------------------|-------------------|-------------------|---------------|
| 1    | DAD 254, 16 nm    | 40.636               | 4.99372e4         | 430.04370         | 97.8326       |
| 2    | DAD 254, 16 nm    | 63.097               | 1106.34253        | 7.03193           | 2.1674        |



3s

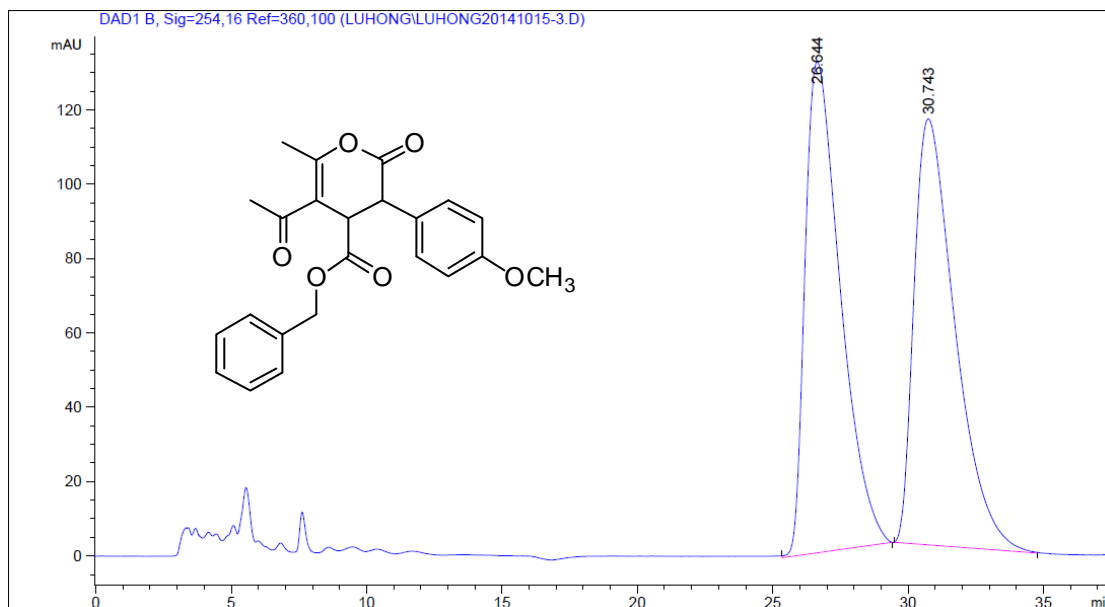

| Peak | Processed Channel | Retention Time (min) | Peak Area (mAU*s) | Peak Height (mAU) | Peak Area (%) |
|------|-------------------|----------------------|-------------------|-------------------|---------------|
| 1    | DAD 254, 16 nm    | 26.644               | 1.19727e4         | 132.14328         | 49.8551       |
| 2    | DAD 254, 16 nm    | 30.743               | 1.20423e4         | 114.58701         | 50.1449       |

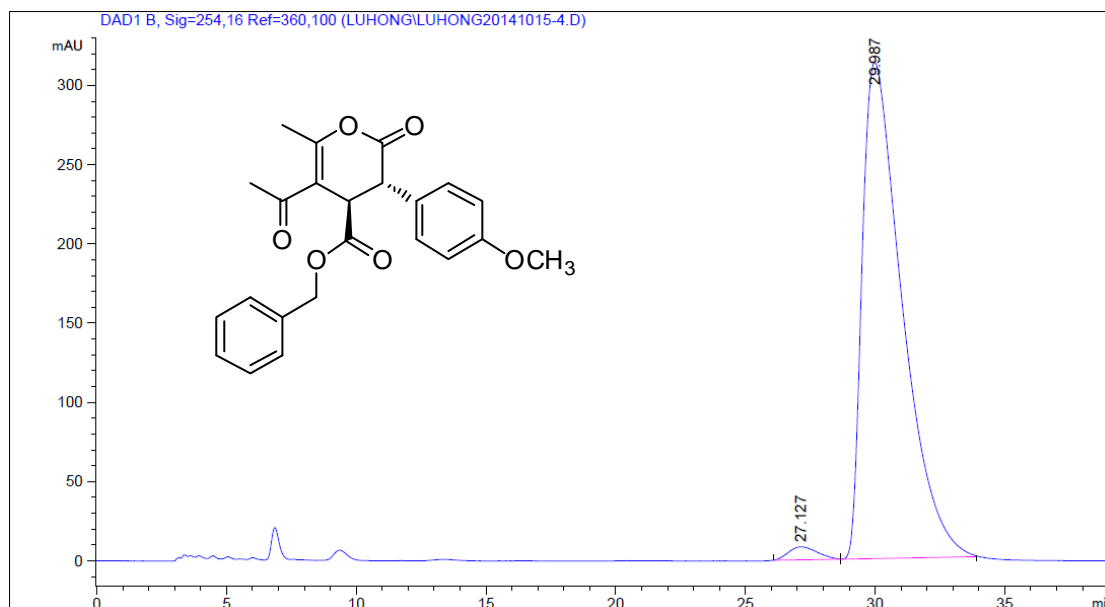

| Peak | Processed Channel | Retention Time (min) | Peak Area (mAU*s) | Peak Height (mAU) | Peak Area (%) |
|------|-------------------|----------------------|-------------------|-------------------|---------------|
| 1    | DAD 254, 16 nm    | 27.127               | 626.90314         | 8.19894           | 1.8409        |
| 2    | DAD 254, 16 nm    | 29.987               | 3.34267e4         | 312.95358         | 98.1591       |

3t

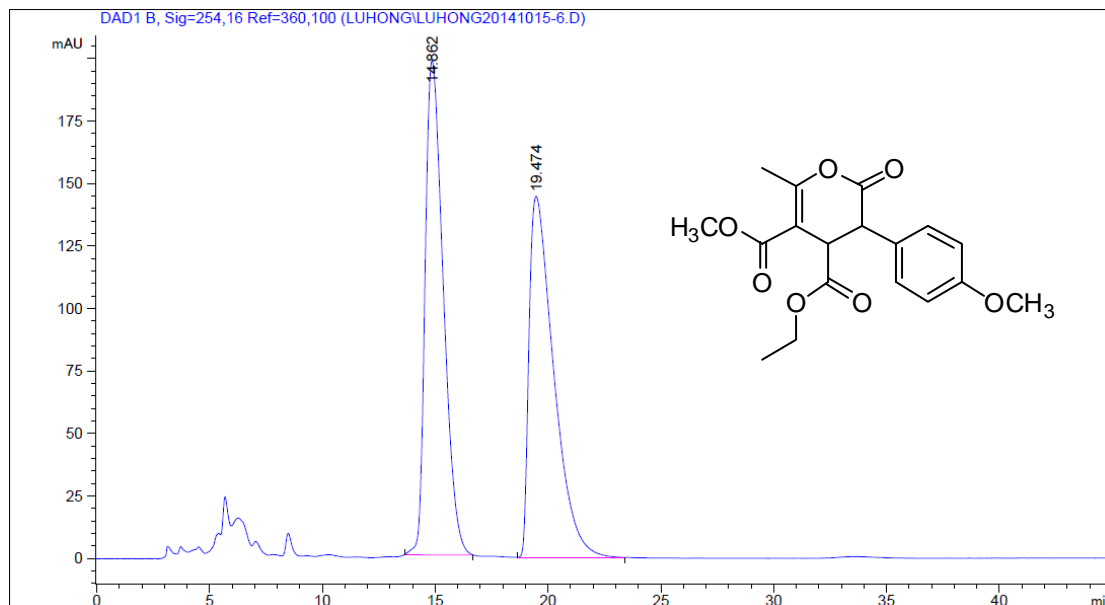

| Peak | Processed Channel | Retention Time (min) | Peak Area (mAU*s) | Peak Height (mAU) | Peak Area (%) |
|------|-------------------|----------------------|-------------------|-------------------|---------------|
| 1    | DAD 254, 16 nm    | 14.862               | 1.10374e4         | 197.91924         | 50.1807       |
| 2    | DAD 254, 16 nm    | 19.474               | 1.09579e4         | 144.61237         | 49.8193       |

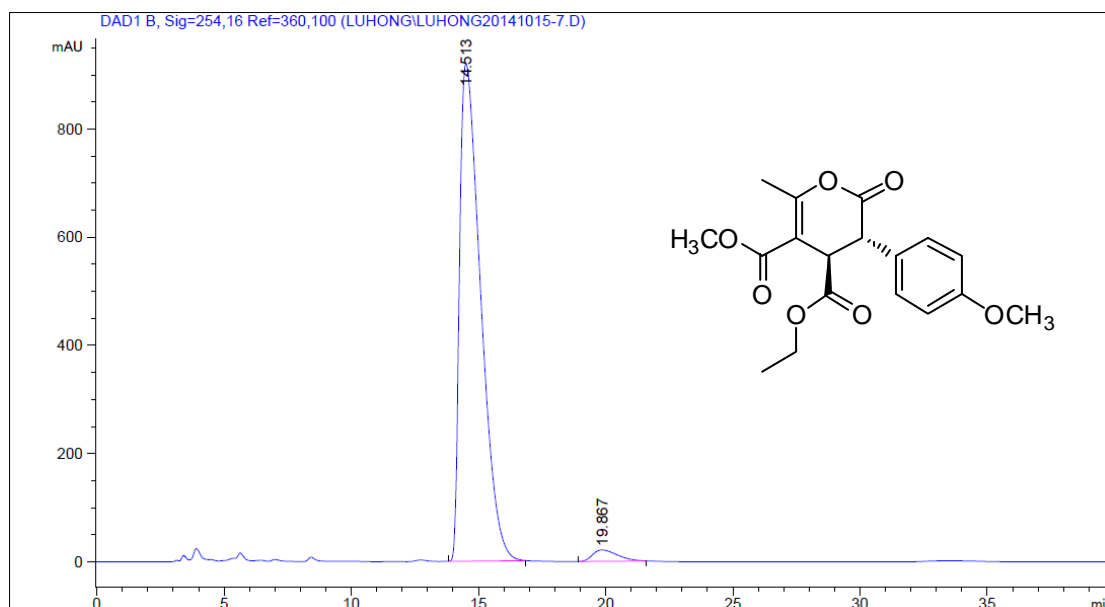

| Peak | Processed Channel | Retention Time (min) | Peak Area (mAU*s) | Peak Height (mAU) | Peak Area (%) |
|------|-------------------|----------------------|-------------------|-------------------|---------------|
| 1    | DAD 254, 16 nm    | 14.513               | 5.27739e4         | 920.35876         | 97.3579       |
| 2    | DAD 254, 16 nm    | 19.867               | 1432.20190        | 20.98921          | 2.6421        |

3u

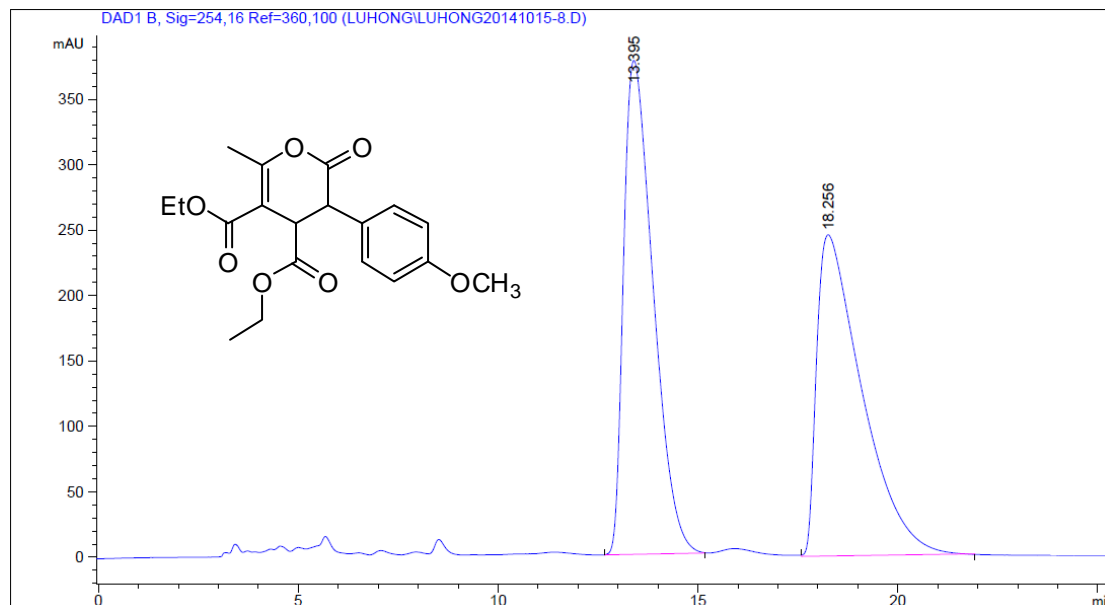

| Peak | Processed Channel | Retention Time (min) | Peak Area (mAU*s) | Peak Height (mAU) | Peak Area (%) |
|------|-------------------|----------------------|-------------------|-------------------|---------------|
| 1    | DAD 254, 16 nm    | 13.395               | 1.93720e4         | 377.46848         | 50.1193       |
| 2    | DAD 254, 16 nm    | 18.256               | 1.92798e4         | 245.45526         | 49.8807       |

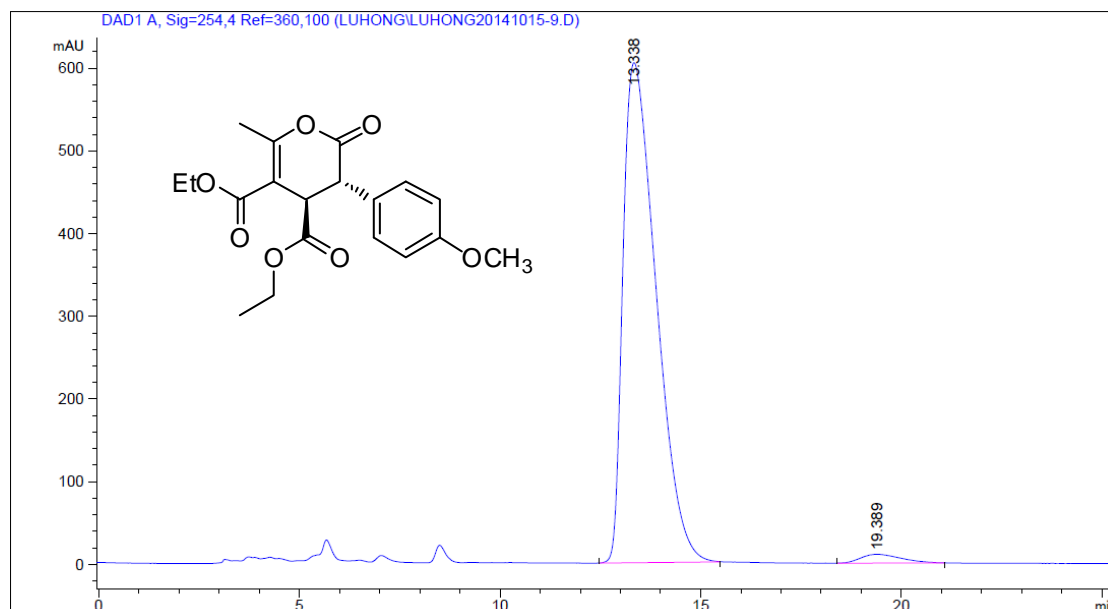

| Peak | Processed Channel | Retention Time (min) | Peak Area (mAU*s) | Peak Height (mAU) | Peak Area (%) |
|------|-------------------|----------------------|-------------------|-------------------|---------------|
| 1    | DAD 254, 16 nm    | 13.338               | 3.46210e4         | 604.72217         | 97.9056       |
| 2    | DAD 254, 16 nm    | 19.389               | 740.59613         | 10.58835          | 2.0944        |

3v

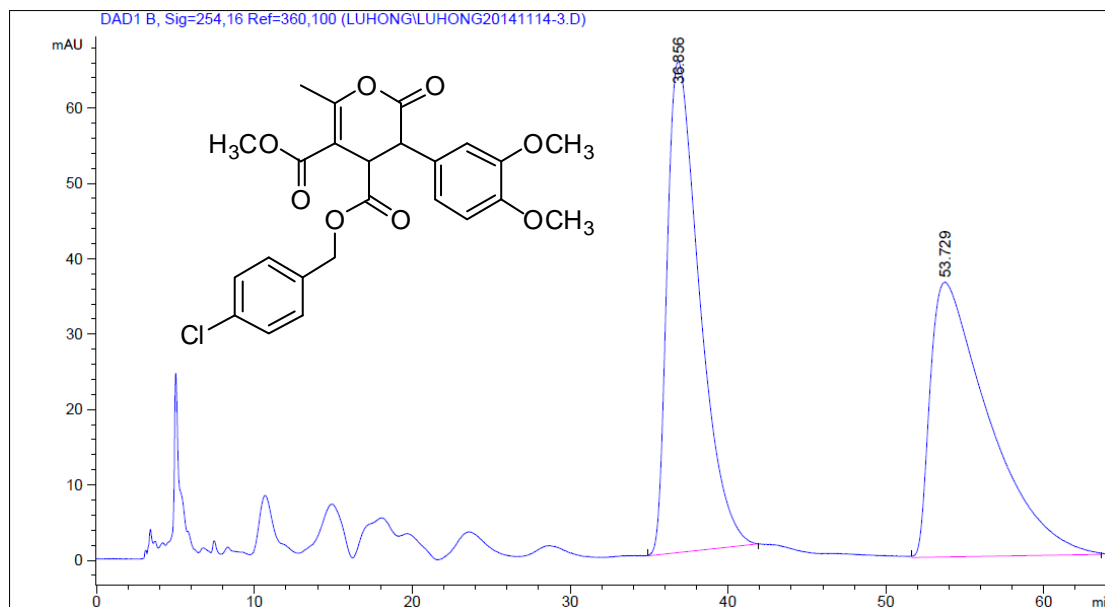

| Peak | Processed Channel | Retention Time (min) | Peak Area (mAU*s) | Peak Height (mAU) | Peak Area (%) |
|------|-------------------|----------------------|-------------------|-------------------|---------------|
| 1    | DAD 254, 16 nm    | 36.856               | 9330.18750        | 65.16678          | 49.7995       |
| 2    | DAD 254, 16 nm    | 53.729               | 9405.30176        | 36.44764          | 50.2005       |

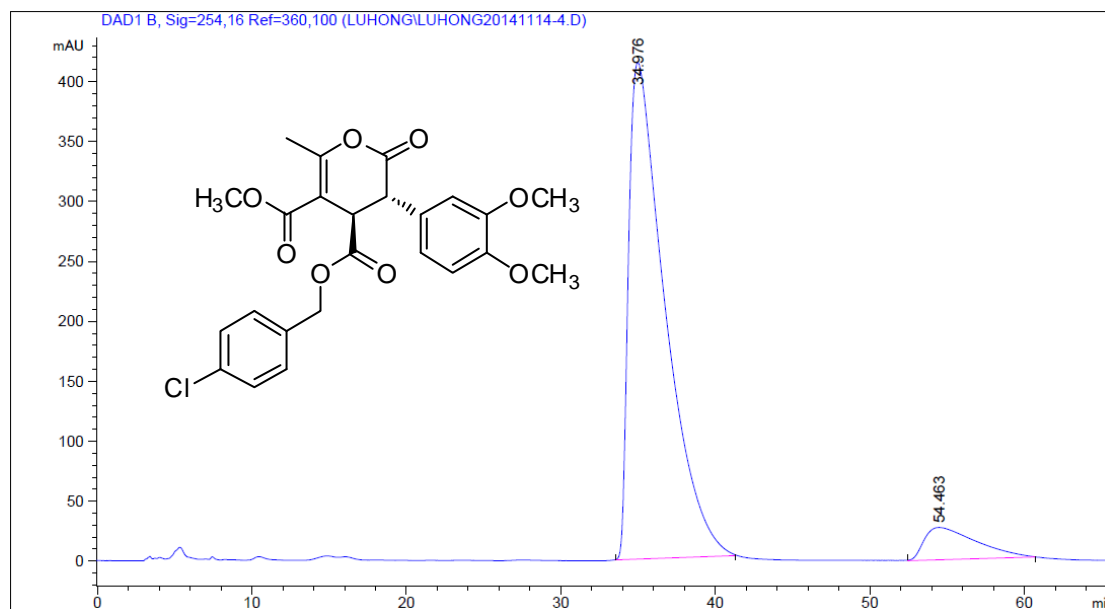

| Peak | Processed Channel | Retention Time (min) | Peak Area (mAU*s) | Peak Height (mAU) | Peak Area (%) |
|------|-------------------|----------------------|-------------------|-------------------|---------------|
| 1    | DAD 254, 16 nm    | 34.976               | 6.77280e4         | 414.29953         | 91.5319       |
| 2    | DAD 254, 16 nm    | 54.463               | 6265.88574        | 27.00175          | 8.4681        |

3w

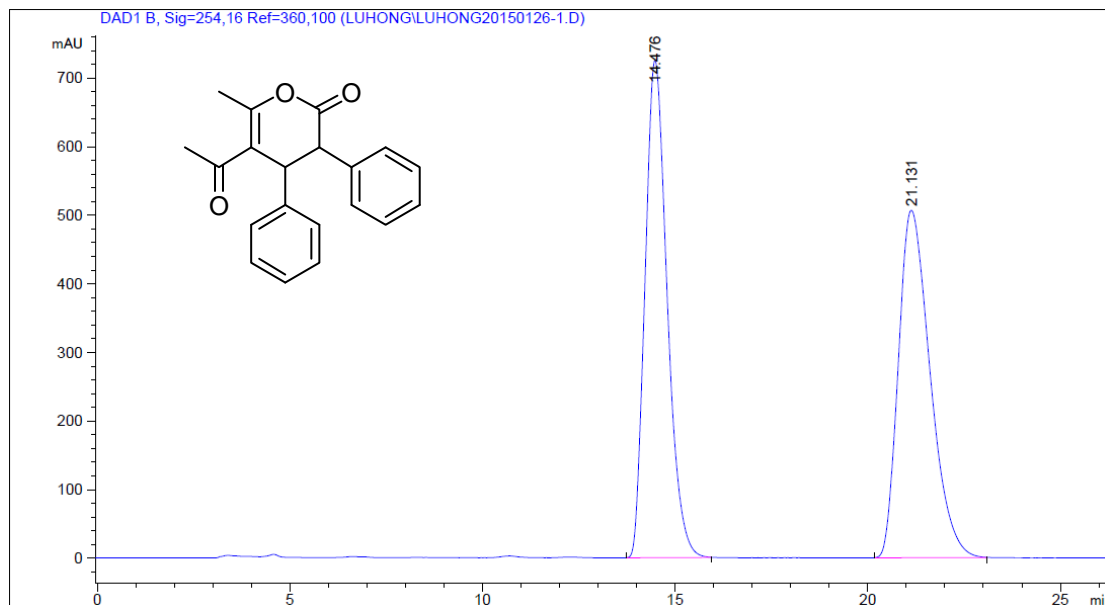

| Peak | Processed Channel | Retention Time (min) | Peak Area (mAU*s) | Peak Height (mAU) | Peak Area (%) |
|------|-------------------|----------------------|-------------------|-------------------|---------------|
| 1    | DAD 254, 16 nm    | 14.476               | 2.88310e4         | 725.20691         | 49.9210       |
| 2    | DAD 254, 16 nm    | 21.131               | 2.89223e4         | 506.57614         | 50.0790       |

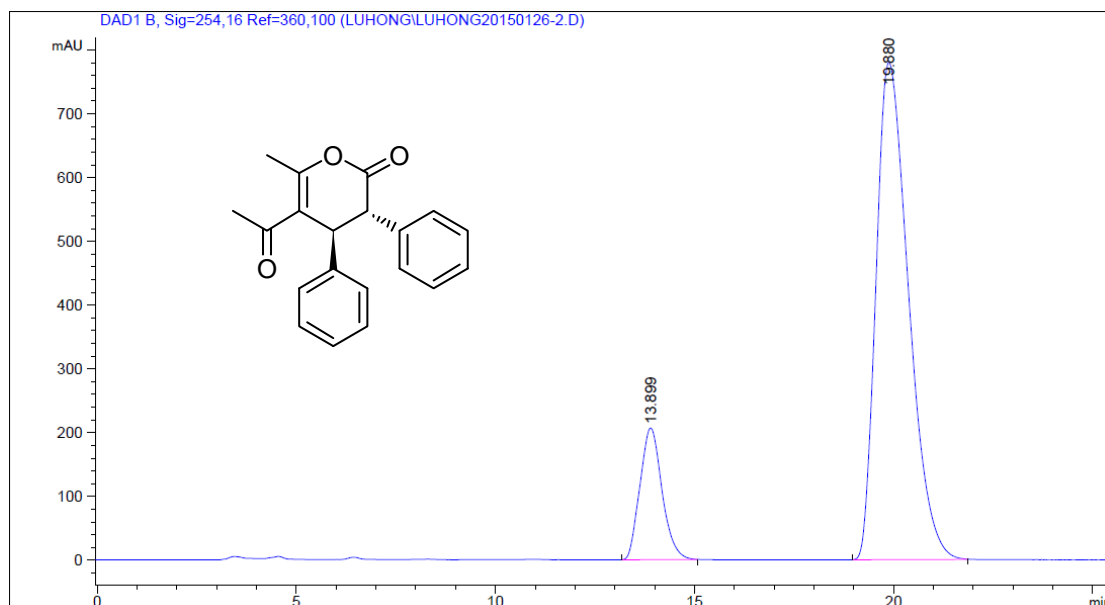

| Peak | Processed Channel | Retention Time (min) | Peak Area (mAU*s) | Peak Height (mAU) | Peak Area (%) |
|------|-------------------|----------------------|-------------------|-------------------|---------------|
| 1    | DAD 254, 16 nm    | 13.899               | 7955.07373        | 206.62357         | 15.2991       |
| 2    | DAD 254, 16 nm    | 19.880               | 4.40420e4         | 779.88367         | 84.7009       |

3x

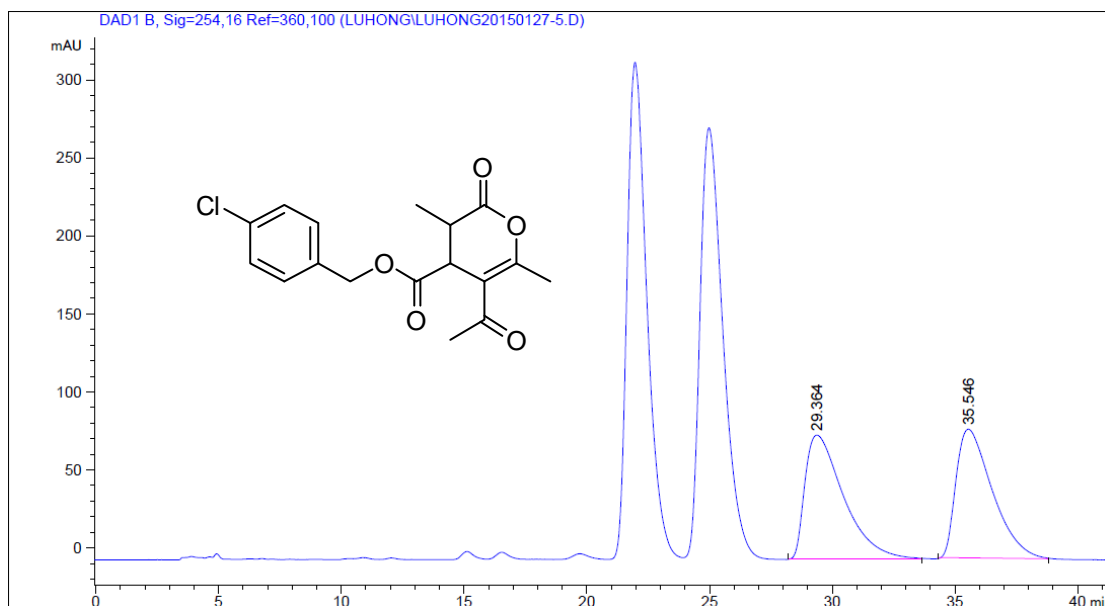

| Peak | Processed Channel | Retention Time (min) | Peak Area (mAU*s) | Peak Height (mAU) | Peak Area (%) |
|------|-------------------|----------------------|-------------------|-------------------|---------------|
| 1    | DAD 254, 16 nm    | 29.364               | 8643.55469        | 79.28326          | 50.5026       |
| 2    | DAD 254, 16 nm    | 35.546               | 8471.50195        | 82.48608          | 49.4974       |

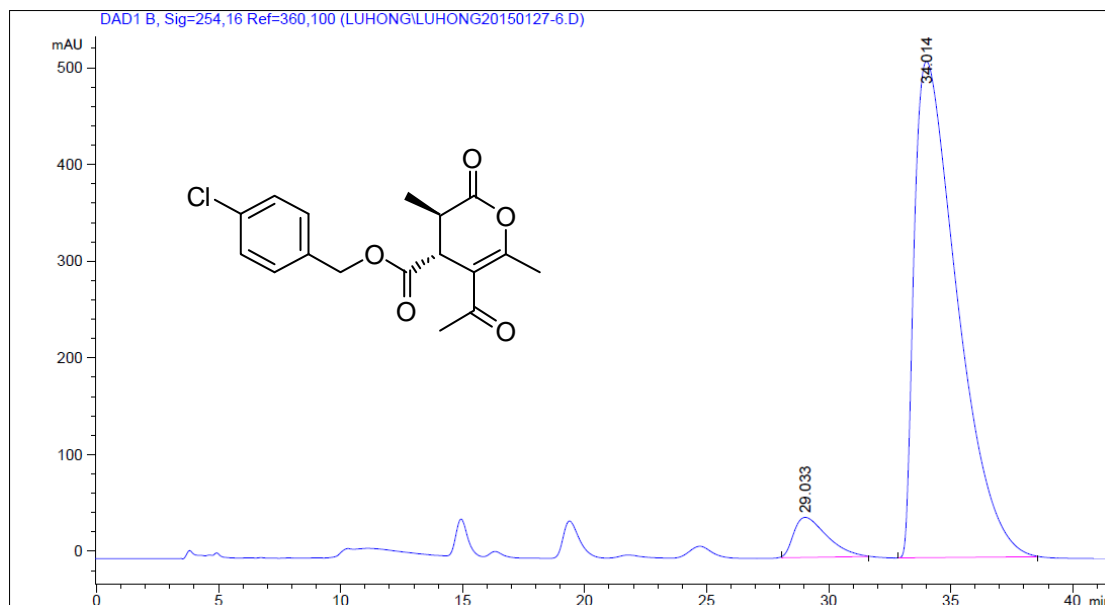

| Peak | Processed Channel | Retention Time (min) | Peak Area (mAU*s) | Peak Height (mAU) | Peak Area (%) |
|------|-------------------|----------------------|-------------------|-------------------|---------------|
| 1    | DAD 254, 16 nm    | 29.033               | 3923.86377        | 41.47171          | 5.8839        |
| 2    | DAD 254, 16 nm    | 34.014               | 6.27641e4         | 513.21808         | 94.1161       |

6a

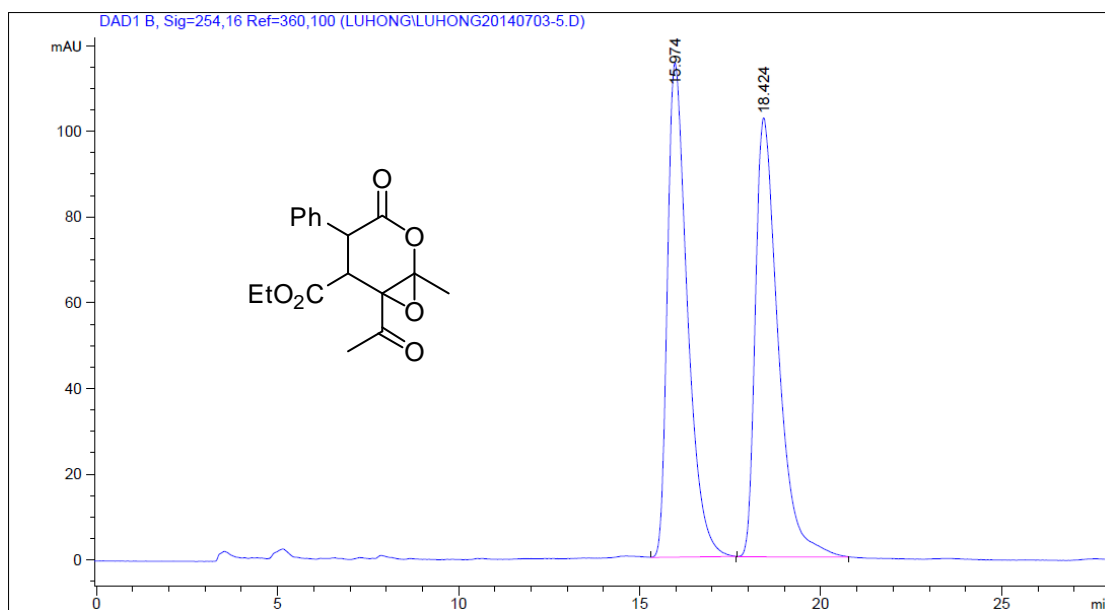

| Peak | Processed Channel | Retention Time (min) | Peak Area (mAU*s) | Peak Height (mAU) | Peak Area (%) |
|------|-------------------|----------------------|-------------------|-------------------|---------------|
| 1    | DAD 254, 16 nm    | 15.974               | 4424.85010        | 115.26480         | 49.6742       |
| 2    | DAD 254, 16 nm    | 18.424               | 4482.89453        | 102.39242         | 50.3258       |

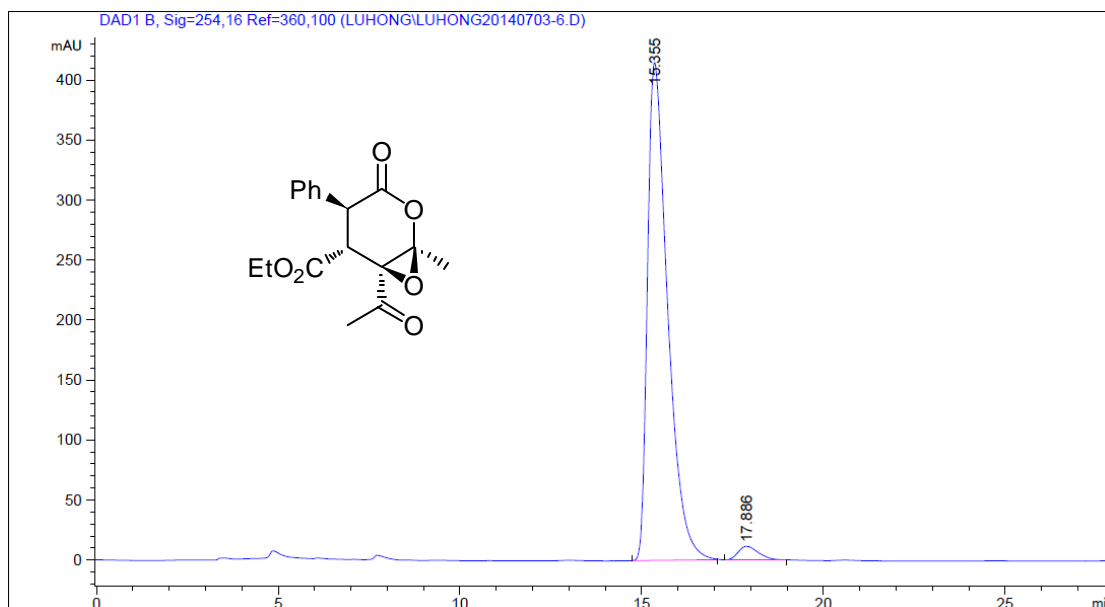

| Peak | Processed Channel | Retention Time (min) | Peak Area (mAU*s) | Peak Height (mAU) | Peak Area (%) |
|------|-------------------|----------------------|-------------------|-------------------|---------------|
| 1    | DAD 254, 16 nm    | 15.355               | 1.59502e4         | 414.93729         | 97.3614       |
| 2    | DAD 254, 16 nm    | 17.886               | 432.26294         | 11.25341          | 2.6386        |
